# Supplementary material for: Enantioselective amination of 4-alkylisoquinoline-1,3(2H,4H)-dione derivatives
Source: Royal Society of Chemistry journal article supplement (doi:10.1039/d0ra07806a), 2020-01-01
Supplement: d0ra07806a1.pdf [file d0ra07806a1.pdf]

## *Supporting Information*

### **Enantioselective Amination of 4-Alkylisoquinoline-1,3(2*H*,4*H*)-dione Derivatives**

Cheng Cheng, Ying-Xian Li, Xue-Ming Jia, Ji-Quan Zhang, Yong-Long Zhao, Wei Feng  
Lei Tang,\* and Yuan-Yong Yang\*

*State Key Laboratory of Functions and Applications of Medicinal Plants, School of Pharmacy,  
Guizhou Provincial Engineering Technology Research Center for Chemical Drug R&D, Guizhou  
Medical University, Guiyang 550004, China.*

*\*Corresponding authors: yangyuanrong@gmc.edu.cn; tlei1974@gmc.edu.cn*

### **Table of Contents**

|                                                        |    |
|--------------------------------------------------------|----|
| 1. General Information                                 | 2  |
| 2. General Procedure for Synthesis of <b>6a-6u</b>     | 3  |
| 3. Procedure for Synthesis of <b>7</b>                 | 3  |
| 4. Substrate Scope for the Amination reaction          | 4  |
| 5. Spectroscopic Data for starting materials           | 5  |
| 6. Spectroscopic Data for Products                     | 12 |
| 7. Crystal data and structure refinement for <b>6I</b> | 28 |
| 8. <sup>1</sup> H and <sup>13</sup> C NMR Spectra      | 29 |
| 9. HPLC spectra                                        | 68 |
| 10. References                                         | 92 |

## 1. General Information

Proton nuclear magnetic resonance ( $^1\text{H}$  NMR) spectra and carbon nuclear magnetic resonance ( $^{13}\text{C}$  NMR) spectra were recorded on INOVA 400 MHz spectrometer (400 MHz and 100 MHz). Chemical shifts for protons are reported in parts per million downfield from tetramethylsilane and are referenced to residual protium in the NMR solvent ( $\text{CDCl}_3$ ;  $\delta$  0.00). Chemical shifts for carbon are reported in parts per million downfield from tetramethylsilane and are referenced to the carbon resonances of the solvent ( $\text{CDCl}_3$ ;  $\delta$  77.0). Data are represented as follows: chemical shift, integration, multiplicity (br = broad, s = singlet, d = doublet, t = triplet, q = quartet, m = multiplet), coupling constants in Hertz (Hz). All high resolution mass spectra were obtained on a Waters G2-XSQToF mass spectrometer. Melting points were determined on a Tektronix X-4 melting point apparatus. Analytical TLC was performed using EM separations percolated silica gel 0.2 mm layer UV 254 fluorescent sheets.

**Starting Materials.** All solvents and inorganic reagents were from commercial sources and used without purification unless otherwise noted. Starting material and catalysts were prepared following the literature procedures.<sup>[1,2]</sup>

## 2. General Procedure for Synthesis of 6a-6u

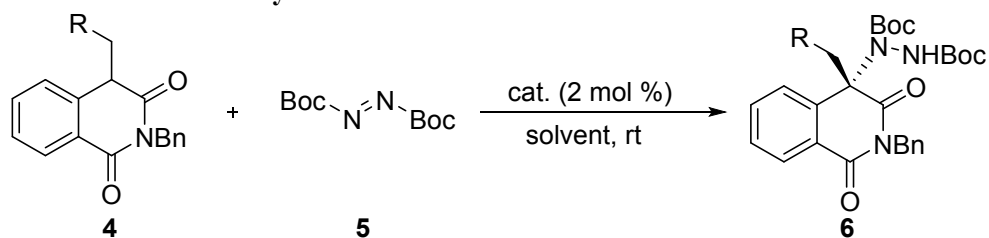

Diterbutyl azodicarboxylate **5** (0.036 mmol, 1.2 equiv.) and cat (2.0 mol%) was added to a miniature reaction bottle and the temperature was maintained at room temperature. After 5 min, **4** (0.03 mmol, 1 equiv.) was added and reacted for 48 h. The reaction was monitored by TLC analysis. Upon completion the solvent was removed by rotary evaporator and the crude product was purified by flash column chromatography (hexane/ethyl acetate = 50:1 to 20:1) to yield the desired product.

## 3. Procedure for Synthesis of 7

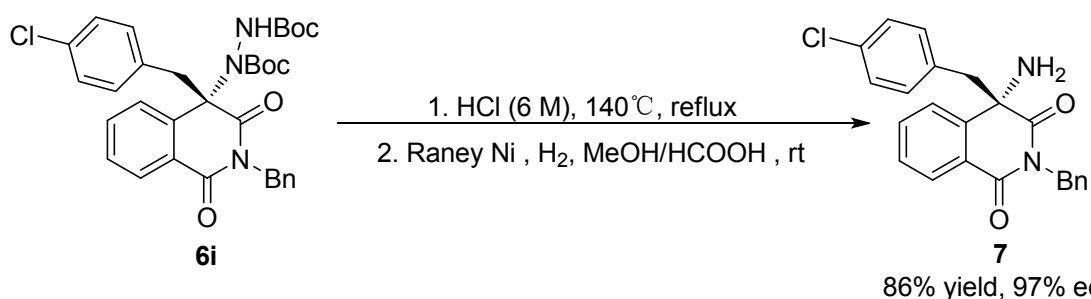

The **6i** (0.03 mmol) was added in hydrochloric acid (1 mL, 6 M) and the mixture was refluxed at 140 °C for 1 hour. The solvent was removed under reduced pressure, followed by cleavage of the hydrazine bond using Raney Ni and H<sub>2</sub> in methanol: Formic acid (9:1, 1 mL) afforded the **7** in 86% yield.

#### 4. Substrate Scope for the Amination reaction

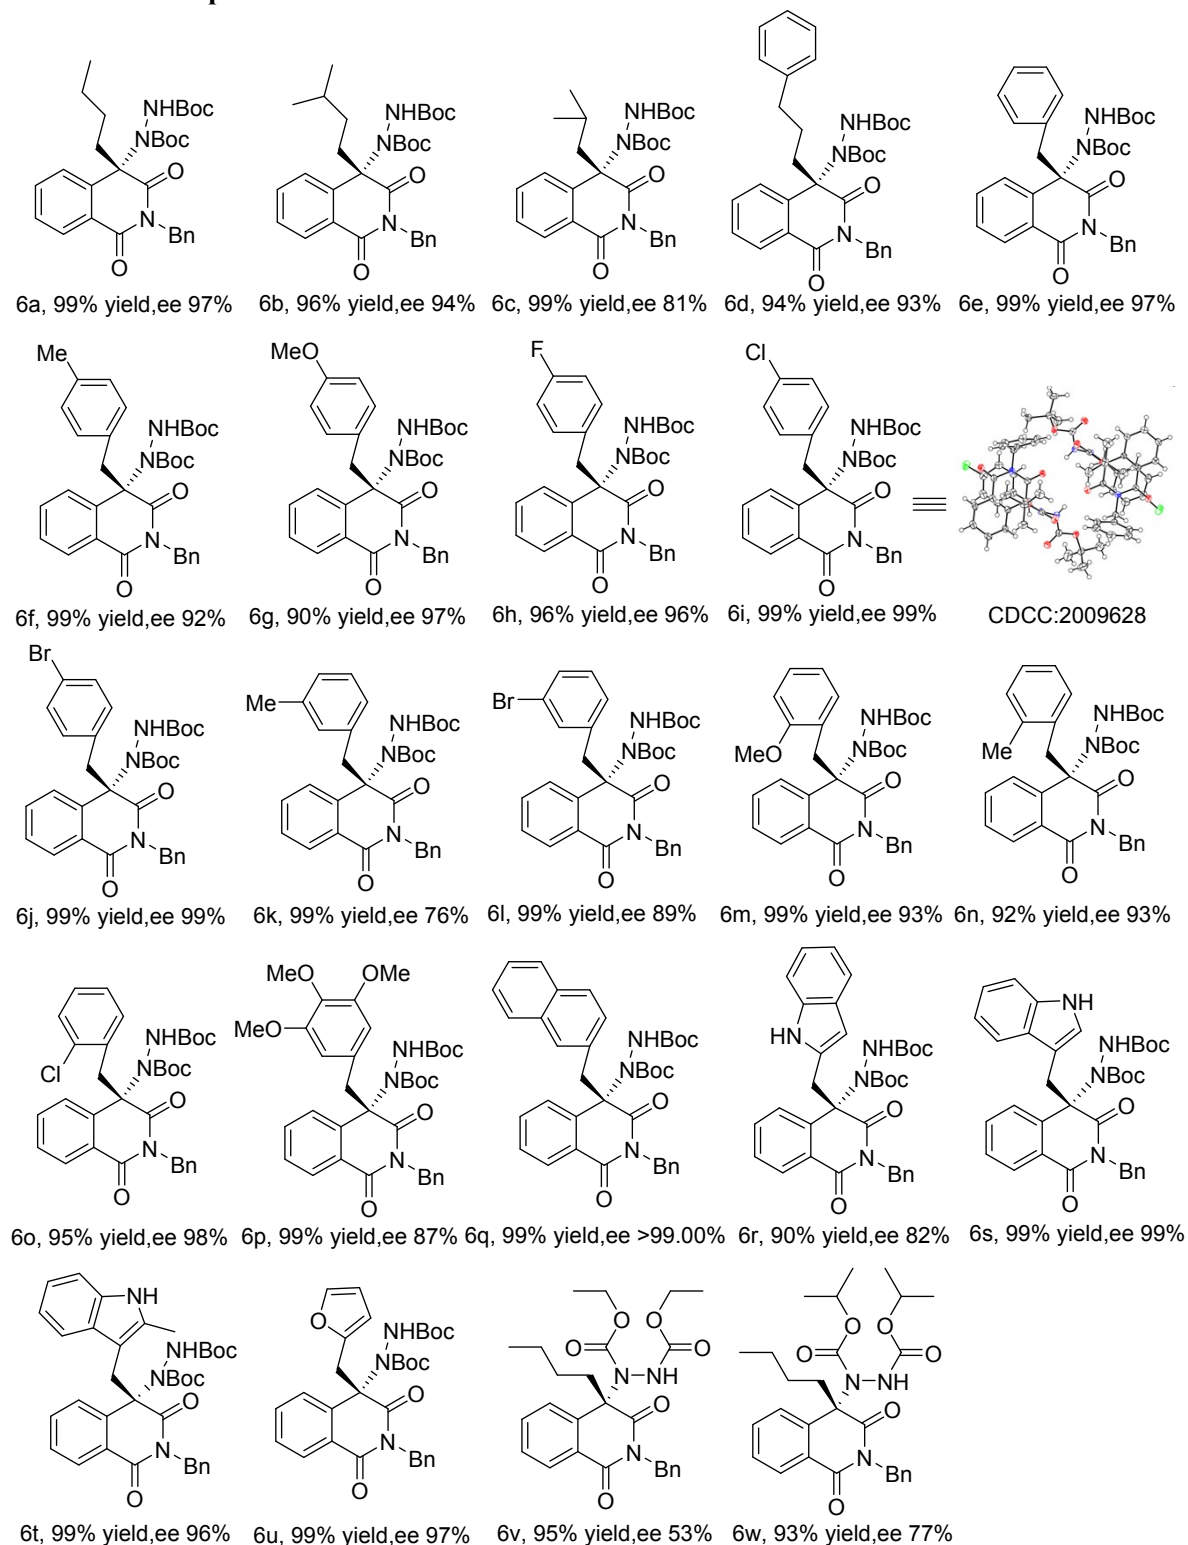

## 5. Spectroscopic Data for starting materials

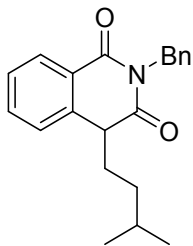

### 2-benzyl-4-isopentylisoquinoline-1,3(2H,4H)-dione (4b):

White oil, 327.4 mg, 51% yield;

$^1\text{H}$  NMR ( $\text{CDCl}_3$ , 400 MHz):  $\delta$  8.16 (dd,  $J = 7.9, 1.3$  Hz, 1H), 7.54 (td,  $J = 7.6, 1.4$  Hz, 1H), 7.42 – 7.35 (m, 3H), 7.25 – 7.15 (m, 4H), 5.17 – 5.07 (m, 2H), 3.88 (t,  $J = 5.5$  Hz, 1H), 2.09 (ddt,  $J = 13.3, 12.1, 5.1$  Hz, 1H), 1.89 – 1.79 (m, 1H), 1.35 – 1.23 (m, 1H), 0.89 – 0.70 (m, 2H), 0.65 (dd,  $J = 8.6, 6.6$  Hz, 6H);

$^{13}\text{C}$  NMR ( $\text{CDCl}_3$ , 100 MHz):  $\delta$  173.7, 164.7, 139.3, 137.1, 133.7, 129.0, 128.3, 127.5, 127.4, 126.7, 125.5, 46.4, 43.2, 35.3, 33.6, 27.7, 22.3, 22.1;

HRMS (ESI):  $\text{C}_{21}\text{H}_{24}\text{NO}_2$  for  $[\text{M}+\text{H}]^+$ , calculated 322.1807, found 322.1808;

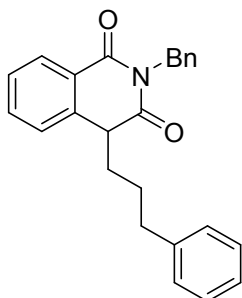

### 2-benzyl-4-(3-phenylpropyl)isoquinoline-1,3(2H,4H)-dione (4d):

White oil, 442.8 mg, 60% yield;

$^1\text{H}$  NMR ( $\text{CDCl}_3$ , 400 MHz):  $\delta$  8.16 (d,  $J = 7.8$  Hz, 1H), 7.56 – 7.49 (m, 1H), 7.39 (dd,  $J = 14.1, 7.1$  Hz, 3H), 7.25 – 7.08 (m, 7H), 6.92 (d,  $J = 7.1$  Hz, 2H), 5.13 (d,  $J = 1.1$  Hz, 2H), 3.91 (t,  $J = 5.6$  Hz, 1H), 2.51 – 2.33 (m, 2H), 2.20 – 2.10 (m, 1H), 1.96 – 1.85 (m, 1H), 1.31 – 1.19 (m, 2H);

$^{13}\text{C}$  NMR ( $\text{CDCl}_3$ , 100 MHz):  $\delta$  173.5, 164.6, 141.2, 139.0, 137.1, 133.7, 129.0, 128.9, 128.4, 128.3, 128.2, 127.6, 127.5, 126.7, 125.9, 125.4, 46.1, 43.3, 36.7, 35.3, 26.5;

HRMS (ESI):  $\text{C}_{25}\text{H}_{24}\text{NO}_2$  for  $[\text{M}+\text{H}]^+$ , calculated 370.1807, found 370.1809;

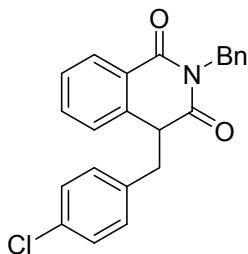

**2-benzyl-4-(4-chlorobenzyl)isoquinoline-1,3(2H,4H)-dione (4i):**

White solid, 427.5 mg, 57% yield. mp: 110.6-111.3 °C;

$^1\text{H}$  NMR ( $\text{CDCl}_3$ , 400 MHz):  $\delta$  8.03 (dd,  $J = 7.9, 1.3$  Hz, 1H), 7.51 (td,  $J = 7.6, 1.4$  Hz, 1H), 7.35 (ddd,  $J = 8.0, 7.5, 0.8$  Hz, 1H), 7.29 – 7.23 (m, 2H), 7.23 – 7.17 (m, 3H), 7.14 (d,  $J = 7.7$  Hz, 1H), 6.89 – 6.71 (m, 2H), 6.43 – 6.29 (m, 2H), 4.94 (q,  $J = 13.7$  Hz, 2H), 4.13 (t,  $J = 5.4$  Hz, 1H), 3.32 (dd,  $J = 13.3, 5.9$  Hz, 1H), 3.14 (dd,  $J = 13.3, 4.9$  Hz, 1H);

$^{13}\text{C}$  NMR ( $\text{CDCl}_3$ , 100 MHz):  $\delta$  172.6, 164.1, 137.7, 136.7, 133.6, 133.5, 132.9, 130.5, 129.1, 129.0, 128.3, 128.3, 127.9, 127.5, 127.1, 125.8, 47.6, 43.3, 42.3;

HRMS (ESI):  $\text{C}_{23}\text{H}_{19}\text{NO}_2\text{Cl}$  for  $[\text{M}+\text{H}]^+$ , calculated 376.1104, found 376.1105;

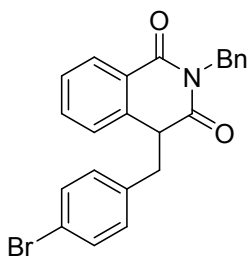

**2-benzyl-4-(4-bromobenzyl)isoquinoline-1,3(2H,4H)-dione (4j):**

White solid, 596.4 mg, 71% yield. mp: 103.2-105.1 °C;

$^1\text{H}$  NMR ( $\text{CDCl}_3$ , 400 MHz):  $\delta$  8.03 (dd,  $J = 7.9, 1.3$  Hz, 1H), 7.50 (td,  $J = 7.6, 1.4$  Hz, 1H), 7.34 (td,  $J = 7.8, 0.7$  Hz, 1H), 7.27 – 7.17 (m, 5H), 7.13 (d,  $J = 7.7$  Hz, 1H), 6.99 – 6.87 (m, 2H), 6.33 – 6.24 (m, 2H), 4.93 (q,  $J = 13.7$  Hz, 2H), 4.12 (t,  $J = 5.4$  Hz, 1H), 3.29 (dd,  $J = 13.3, 5.9$  Hz, 1H), 3.11 (dd,  $J = 13.3, 4.9$  Hz, 1H);

$^{13}\text{C}$  NMR ( $\text{CDCl}_3$ , 100 MHz):  $\delta$  172.5, 164.1, 137.7, 136.7, 134.1, 133.5, 131.2, 130.8, 129.1, 129.0, 128.3, 127.9, 127.5, 127.1, 125.7, 121.1, 47.5, 43.3, 42.4;

HRMS (ESI):  $\text{C}_{23}\text{H}_{19}\text{NO}_2\text{Br}$  for  $[\text{M}+\text{H}]^+$ , calculated 420.0599, found 420.0603;

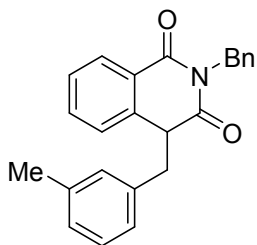

**2-benzyl-4-(3-methylbenzyl)isoquinoline-1,3(2H,4H)-dione (4k):**

White solid, 433.1 mg, 61% yield. mp: 114.1-115.3 °C;

<sup>1</sup>H NMR (CDCl<sub>3</sub>, 400 MHz): δ 8.00 (d, *J* = 7.8 Hz, 1H), 7.46 (td, *J* = 7.6, 1.1 Hz, 1H), 7.38 – 7.25 (m, 3H), 7.21 – 7.12 (m, 3H), 7.05 (d, *J* = 7.7 Hz, 1H), 6.83 (dt, *J* = 14.8, 7.5 Hz, 2H), 6.38 – 6.27 (m, 2H), 4.92 (s, 2H), 4.12 (t, *J* = 5.6 Hz, 1H), 3.20 (ddd, *J* = 18.1, 13.2, 5.6 Hz, 2H), 2.04 (s, 3H);

<sup>13</sup>C NMR (CDCl<sub>3</sub>, 100 MHz): δ 173.0, 164.3, 138.1, 137.6, 136.9, 135.3, 133.2, 130.0, 128.9, 128.7, 128.3, 128.0, 127.8, 127.6, 127.3, 127.3, 126.2, 125.8, 48.2, 43.4, 43.3, 21.2;

HRMS (ESI): C<sub>24</sub>H<sub>22</sub>NO<sub>2</sub> for [M+H]<sup>+</sup>, calculated 356.1651, found 356.1652;

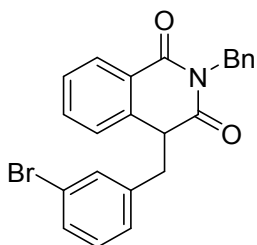

**2-benzyl-4-(3-bromobenzyl)isoquinoline-1,3(2H,4H)-dione (4l):**

White solid, 662.0 mg, 79% yield. mp: 117.7-119.0 °C;

<sup>1</sup>H NMR (CDCl<sub>3</sub>, 400 MHz): δ 8.01 (d, *J* = 7.8 Hz, 1H), 7.52 – 7.45 (m, 1H), 7.34 (t, *J* = 7.6 Hz, 1H), 7.27 (d, *J* = 6.9 Hz, 2H), 7.21 – 7.12 (m, 4H), 7.07 (d, *J* = 7.7 Hz, 1H), 6.73 (dd, *J* = 16.8, 9.0 Hz, 2H), 6.40 (d, *J* = 7.7 Hz, 1H), 4.93 (s, 2H), 4.11 (t, *J* = 5.5 Hz, 1H), 3.25 (dd, *J* = 13.3, 6.1 Hz, 1H), 3.12 (dd, *J* = 13.3, 5.0 Hz, 1H);

<sup>13</sup>C NMR (CDCl<sub>3</sub>, 100 MHz): δ 172.6, 164.1, 137.7, 137.5, 136.8, 133.5, 132.3, 130.2, 129.7, 129.0, 129.0, 128.4, 127.9, 127.8, 127.4, 127.1, 125.7, 122.1, 47.8, 43.4, 42.8;

HRMS (ESI): C<sub>23</sub>H<sub>19</sub>NO<sub>2</sub>Br for [M+H]<sup>+</sup>, calculated 420.0599, found 420.0598;

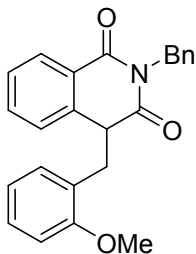

**2-benzyl-4-(2-methoxybenzyl)isoquinoline-1,3(2H,4H)-dione (4m):**

White solid, 526.8 mg, 71% yield. mp: 200.3-201.1 °C;

<sup>1</sup>H NMR (CDCl<sub>3</sub>, 400 MHz): δ 8.02 (dd, *J* = 7.8, 1.4 Hz, 1H), 7.39 – 7.33 (m, 3H), 7.28 (td, *J* = 7.6, 1.1 Hz, 1H), 7.23 – 7.16 (m, 3H), 7.12 – 7.04 (m, 1H), 6.87 (dd, *J* = 7.6, 0.5 Hz, 1H), 6.62 (ddd, *J* = 11.9, 8.4, 4.6 Hz, 2H), 6.49 (dd, *J* = 7.4, 1.7 Hz, 1H), 5.01 (s, 2H), 4.14 (t, *J* = 6.6 Hz, 1H), 3.51 (s, 3H), 3.19 (dd, *J* = 13.0, 6.2 Hz, 1H), 3.07 (dd, *J* = 13.1, 7.0 Hz, 1H);

<sup>13</sup>C NMR (CDCl<sub>3</sub>, 100 MHz): δ 173.4, 164.7, 157.4, 138.7, 137.2, 132.7, 131.3, 129.0, 128.6, 128.5, 128.3, 127.6, 127.4, 125.3, 124.5, 124.0, 120.1, 110.0, 54.9, 47.6, 43.4, 38.9;

HRMS (ESI): C<sub>24</sub>H<sub>22</sub>NO<sub>3</sub> for [M+H]<sup>+</sup>, calculated 372.1600, found 372.1601;

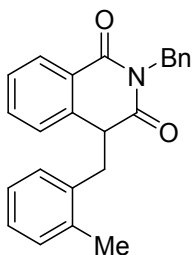

**2-benzyl-4-(2-methylbenzyl)isoquinoline-1,3(2H,4H)-dione (4n):**

White solid, 383.4 mg, 54% yield. mp: 108.5-109.7 °C;

<sup>1</sup>H NMR (CDCl<sub>3</sub>, 400 MHz): δ 8.39 – 7.99 (m, 1H), 7.49 – 7.32 (m, 4H), 7.31 – 7.21 (m, 3H), 7.14 – 7.01 (m, 2H), 6.95 (t, *J* = 7.4 Hz, 1H), 6.77 – 6.50 (m, 2H), 5.15 – 5.04 (m, 2H), 4.09 (dd, *J* = 8.7, 4.9 Hz, 1H), 3.33 (dd, *J* = 13.4, 4.9 Hz, 1H), 3.04 (dd, *J* = 13.4, 8.8 Hz, 1H), 1.95 (s, 3H);

<sup>13</sup>C NMR (CDCl<sub>3</sub>, 100 MHz): δ 173.4, 164.6, 138.0, 137.0, 136.8, 134.4, 132.9, 130.4, 130.4, 129.1, 128.9, 128.4, 127.8, 127.6, 127.4, 127.2, 125.7, 125.3, 48.4, 43.5, 41.2, 19.0;

HRMS (ESI): C<sub>24</sub>H<sub>22</sub>NO<sub>2</sub> for [M+H]<sup>+</sup>, calculated 356.1651, found 356.1653;



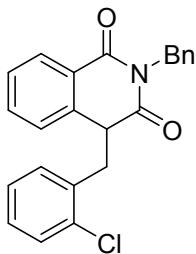

**2-benzyl-4-(2-chlorobenzyl)isoquinoline-1,3(2H,4H)-dione (4o):**

White solid, 517.5 mg, 69% yield. mp: 118.5-119.0 °C;

<sup>1</sup>H NMR (CDCl<sub>3</sub>, 400 MHz): δ 8.10 (dd, *J* = 7.6, 1.6 Hz, 1H), 7.43 – 7.32 (m, 4H), 7.26 – 7.17 (m, 4H), 7.08 (td, *J* = 7.8, 1.6 Hz, 1H), 6.94 – 6.85 (m, 2H), 6.46 (dd, *J* = 7.6, 1.5 Hz, 1H), 5.06 (q, *J* = 13.8 Hz, 2H), 4.18 (t, *J* = 7.1 Hz, 1H), 3.18 (qd, *J* = 13.5, 7.1 Hz, 2H);

<sup>13</sup>C NMR (CDCl<sub>3</sub>, 100 MHz): δ 172.6, 164.6, 137.9, 137.1, 134.4, 134.1, 133.3, 131.9, 129.5, 129.1, 128.6, 128.4, 127.9, 127.5, 127.5, 126.5, 125.2, 47.3, 43.4, 41.8;

HRMS (ESI): C<sub>23</sub>H<sub>19</sub>NO<sub>2</sub>Cl for [M+H]<sup>+</sup>, calculated 376.1104, found 376.1105;

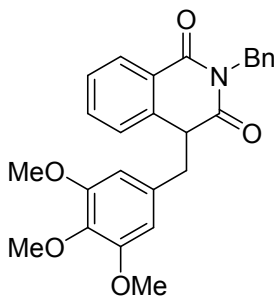

**2-benzyl-4-(3,4,5-trimethylbenzyl)isoquinoline-1,3(2H,4H)-dione (4p):**

Yellow solid, 459.6 mg, 60% yield. mp: 107.6-110.1 °C;

<sup>1</sup>H NMR (CDCl<sub>3</sub>, 400 MHz): δ 8.11 (dd, *J* = 7.9, 1.2 Hz, 1H), 7.56 (td, *J* = 7.6, 1.4 Hz, 1H), 7.43 – 7.38 (m, 1H), 7.25 – 7.14 (m, 6H), 5.81 (s, 2H), 5.03 – 4.95 (m, 2H), 4.21 (t, *J* = 5.4 Hz, 1H), 3.75 (s, 3H), 3.51 (s, 6H), 3.30 – 3.25 (m, 2H);

<sup>13</sup>C NMR (CDCl<sub>3</sub>, 100 MHz): δ 172.9, 164.1, 152.7, 138.1, 137.0, 136.7, 133.3, 130.9, 128.9, 128.3, 127.7, 127.4, 127.3, 126.0, 106.2, 60.8, 58.4, 55.8, 48.1, 43.4;

HRMS (ESI): C<sub>26</sub>H<sub>25</sub>NO<sub>5</sub>Na for [M+Na]<sup>+</sup>, calculated 454.1630, found 454.1629;

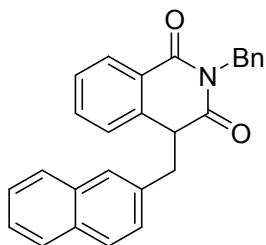

**2-benzyl-4-(naphthalen-2-ylmethyl)isoquinoline-1,3(2H,4H)-dione (4q):**

Yellow solid, 516.1 mg, 66% yield. mp: 155.6-155.8 °C;

<sup>1</sup>H NMR (CDCl<sub>3</sub>, 400 MHz): δ 7.91 (d, *J* = 7.8 Hz, 1H), 7.58 – 7.53 (m, 1H), 7.39 – 7.32 (m, 3H), 7.27 – 7.21 (m, 3H), 7.14 – 7.09 (m, 2H), 7.00 (dt, *J* = 15.5, 6.8 Hz, 5H), 6.59 (dd, *J* = 8.4, 1.5 Hz, 1H), 4.85 (s, 2H), 4.14 (t, *J* = 5.7 Hz, 1H), 3.33 (qd, *J* = 13.3, 5.7 Hz, 2H);

<sup>13</sup>C NMR (CDCl<sub>3</sub>, 100 MHz): δ 172.9, 164.2, 138.0, 136.8, 133.3, 133.1, 133.1, 132.3, 128.9, 128.7, 128.3, 128.3, 127.8, 127.7, 127.6, 127.5, 127.3, 127.1, 126.0, 125.7, 125.6, 48.1, 43.4, 43.4;

HRMS (ESI): C<sub>27</sub>H<sub>22</sub>NO<sub>2</sub> for [M+H]<sup>+</sup>, calculated 392.1651, found 392.1652;

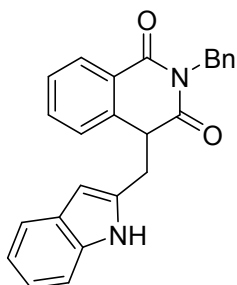

**4-((1H-indol-2-yl)methyl)-2-benzylisoquinoline-1,3(2H,4H)-dione (4r):**

Brown solid, 182.4 mg, 24% yield. mp: 139.7-142.4 °C;

<sup>1</sup>H NMR (CDCl<sub>3</sub>, 400 MHz): δ 8.06 (d, *J* = 7.3 Hz, 1H), 7.74 (s, 1H), 7.50 (td, *J* = 7.6, 1.2 Hz, 1H), 7.33 (t, *J* = 7.6 Hz, 1H), 7.27 (d, *J* = 7.8 Hz, 1H), 7.20 (d, *J* = 7.7 Hz, 1H), 7.17 – 7.05 (m, 5H), 6.97 (d, *J* = 3.8 Hz, 2H), 6.93 – 6.88 (m, 1H), 5.72 (d, *J* = 1.7 Hz, 1H), 5.01 (s, 2H), 4.14 (t, *J* = 5.1 Hz, 1H), 3.51 (dd, *J* = 14.7, 5.4 Hz, 1H), 3.40 (dd, *J* = 14.7, 5.0 Hz, 1H);

<sup>13</sup>C NMR (CDCl<sub>3</sub>, 100 MHz): δ 173.3, 164.1, 137.7, 136.6, 135.9, 133.8, 133.3, 129.2, 128.5, 128.3, 128.1, 128.0, 127.4, 126.8, 125.4, 121.6, 120.1, 119.7, 110.7, 102.3, 46.3, 43.5, 34.3;

HRMS (ESI): C<sub>25</sub>H<sub>21</sub>N<sub>2</sub>O<sub>2</sub> for [M+H]<sup>+</sup>, calculated 381.1603, found 381.1605;

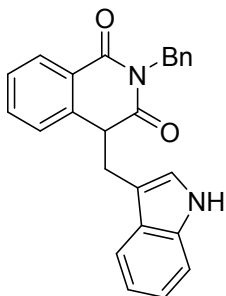

**4-((1H-indol-3-yl)methyl)-2-benzylisoquinoline-1,3(2H,4H)-dione (4s):**

Yellow solid, 281.2 mg, 37% yield. mp: 153.6-154.4 °C;

<sup>1</sup>H NMR (CDCl<sub>3</sub>, 400 MHz): δ 8.03 (d, *J* = 7.8 Hz, 1H), 7.82 (s, 1H), 7.59 (dd, *J* = 10.8, 4.2 Hz, 1H), 7.41 (t, *J* = 7.6 Hz, 1H), 7.32 – 7.28 (m, 2H), 7.28 – 7.21 (m, 5H), 7.20 – 7.11 (m, 2H), 6.99 (t, *J* = 7.5 Hz, 1H), 6.19 (d, *J* = 2.2 Hz, 1H), 4.88 (dd, *J* = 31.3, 13.9 Hz, 2H), 4.35 – 4.27 (m, 1H), 3.66 (dd, *J* = 14.1, 6.1 Hz, 1H), 3.43 (dd, *J* = 14.1, 4.3 Hz, 1H);

<sup>13</sup>C NMR (CDCl<sub>3</sub>, 100 MHz): δ 173.6, 164.4, 138.9, 137.0, 135.6, 133.3, 128.9, 128.6, 128.2, 127.5, 127.3, 127.2, 127.1, 125.9, 123.2, 122.0, 119.5, 118.4, 111.0, 109.4, 47.8, 43.2, 33.7;

HRMS (ESI): C<sub>25</sub>H<sub>21</sub>N<sub>2</sub>O<sub>2</sub> for [M+H]<sup>+</sup>, calculated 381.1603, found 381.1601;

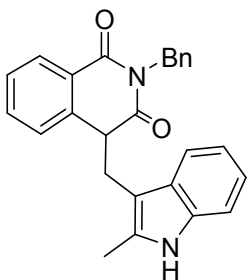

**2-benzyl-4-((2-methyl-1H-indol-3-yl)methyl)isoquinoline-1,3(2H,4H)-dione (4t):**

Yellow solid, 472.8 mg, 60% yield. mp: 175.9-176.2 °C;

<sup>1</sup>H NMR (CDCl<sub>3</sub>, 400 MHz): δ 8.00 (dd, *J* = 7.7, 1.4 Hz, 1H), 7.67 (s, 1H), 7.42 (td, *J* = 7.5, 1.6 Hz, 1H), 7.36 (td, *J* = 7.5, 1.3 Hz, 1H), 7.28 – 7.13 (m, 7H), 7.09 – 7.02 (m, 1H), 7.00 – 6.89 (m, 2H), 4.84 (d, *J* = 14.1 Hz, 1H), 4.66 (d, *J* = 14.1 Hz, 1H), 4.21 (dd, *J* = 7.3, 4.1 Hz, 1H), 3.34 (ddd, *J* = 18.1, 14.0, 5.7 Hz, 2H), 1.49 (s, 3H).

<sup>13</sup>C NMR (CDCl<sub>3</sub>, 100 MHz): δ 174.0, 164.6, 138.9, 137.2, 135.1, 133.5, 133.1, 128.8, 128.7, 128.3, 128.3, 127.7, 127.6, 127.3, 125.9, 121.4, 119.5, 118.0, 110.3, 105.6, 48.4, 43.4, 33.8, 10.7;

HRMS (ESI): C<sub>26</sub>H<sub>23</sub>N<sub>2</sub>O<sub>2</sub> for [M+H]<sup>+</sup>, calculated 395.1760, found 395.1760;

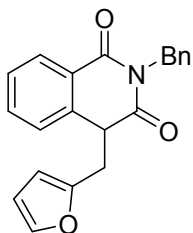

**2-benzyl-4-(furan-2-ylmethyl)isoquinoline-1,3(2H,4H)-dione (4u):**

Yellow solid, 331.0 mg, 50% yield. mp: 86.7-87.0 °C;

<sup>1</sup>H NMR (CDCl<sub>3</sub>, 400 MHz): δ 8.01 (d, *J* = 7.6 Hz, 1H), 7.42 (td, *J* = 7.6, 1.0 Hz, 1H), 7.29 (dd, *J* = 15.3, 7.4 Hz, 3H), 7.19 – 7.11 (m, 3H), 7.00 (d, *J* = 7.7 Hz, 1H), 6.90 (d, *J* = 1.1 Hz, 1H), 5.99 – 5.83 (m, 1H), 5.43 (d, *J* = 3.1 Hz, 1H), 5.00 (q, *J* = 13.8 Hz, 2H), 4.09 (t, *J* = 5.5 Hz, 1H), 3.33 (dd, *J* = 14.7, 6.0 Hz, 1H), 3.20 (dd, *J* = 14.7, 5.2 Hz, 1H);

<sup>13</sup>C NMR (CDCl<sub>3</sub>, 100 MHz): δ 172.6, 164.3, 149.9, 141.8, 137.7, 136.9, 133.5, 129.1, 128.9, 128.7, 128.3, 127.7, 127.4, 126.9, 125.4, 110.1, 108.2, 46.0, 43.5, 35.1;

HRMS (ESI): C<sub>21</sub>H<sub>18</sub>NO<sub>3</sub> for [M+H]<sup>+</sup>, calculated 332.1287, found 332.1290;

**6. Spectroscopic Data for Products**

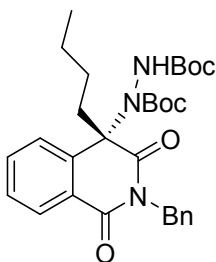

**di-tert-butyl(S)-1-(2-benzyl-4-butyl-1,3-dioxo-1,2,3,4-tetrahydroisoquinolin-4-yl)hydrazine-1,2-dicarboxylate (6a):**

White solid, 15.9 mg, 99% yield. mp: 115.9-118.2 °C;

Optical rotation: [α]<sub>D</sub><sup>26.2</sup> = -11.03 (c 1.7, CHCl<sub>2</sub>);

<sup>1</sup>H NMR (CDCl<sub>3</sub>, 400 MHz): δ 8.23 – 8.14 (m, 2H), 7.63 (t, *J* = 7.2 Hz, 1H), 7.41 (dd, *J* = 19.6, 11.8 Hz, 3H), 7.25 – 7.19 (m, 3H), 6.70 (s, 1H), 5.17 (d, *J* = 13.7 Hz, 1H), 5.11 (d, *J* = 13.6 Hz, 1H), 2.06 (dd, *J* = 36.5, 7.1 Hz, 2H), 1.51 (s, 18H), 1.23 (s, 2H), 1.00 (dd, *J* = 7.3, 3.2 Hz, 2H), 0.59 (t, *J* = 7.3 Hz, 3H);

<sup>13</sup>C NMR (CDCl<sub>3</sub>, 100 MHz): δ 175.7, 167.0, 164.1, 156.5, 143.3, 136.6, 134.4, 129.5, 128.3, 128.2, 127.5, 125.6, 124.5, 82.9, 81.3, 43.7, 29.7, 28.2, 25.1, 22.5, 13.5;

HRMS (ESI): C<sub>30</sub>H<sub>39</sub>N<sub>3</sub>O<sub>6</sub>Na for [M+Na]<sup>+</sup>, calculated 560.2737, found 560.2735;

The enantiomeric excess was determined to be 97.40% by HPLC. [IC column, 230 nm, n-hexane:IPA = 95:5, 0.5 mL/min]: 12.4 min (major), 15.6 min (minor);

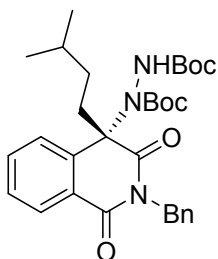

**di-tert-butyl(S)-1-(2-benzyl-4-isopentyl-1,3-dioxo-1,2,3,4-tetrahydroisoquinolin-4-yl)hydrazine-1,2-dicarboxylate (6b):**

White solid, 15.9 mg, 96% yield. mp: 139.6-140.6 °C;

Optical rotation:  $[\alpha]_{26.1}^D = -10.93$  (c 1.2, CHCl<sub>2</sub>);

<sup>1</sup>H NMR (CDCl<sub>3</sub>, 400 MHz):  $\delta$  8.17 (dd,  $J = 14.8, 7.4$  Hz, 2H), 7.63 (t,  $J = 7.2$  Hz, 1H), 7.49 – 7.36 (m, 3H), 7.21 (dt,  $J = 12.7, 3.7$  Hz, 3H), 6.69 (s, 1H), 5.18 (d,  $J = 13.6$  Hz, 1H), 5.08 (d,  $J = 13.6$  Hz, 1H), 2.08 (d,  $J = 11.4$  Hz, 1H), 1.87 – 1.76 (m, 1H), 1.58 (s, 1H), 1.55 (s, 2H), 1.50 (s, 18H), 0.55 (dd,  $J = 6.6, 2.0$  Hz, 6H);

<sup>13</sup>C NMR (CDCl<sub>3</sub>, 100 MHz):  $\delta$  175.7, 164.2, 156.4, 150.0, 136.7, 134.5, 128.4, 128.2, 127.7, 127.6, 127.6, 125.7, 124.6, 82.9, 81.3, 43.7, 31.6, 28.3, 27.9, 27.5, 22.0;

HRMS (ESI): C<sub>31</sub>H<sub>41</sub>N<sub>3</sub>O<sub>6</sub>Na for [M+Na]<sup>+</sup>, calculated 574.2893, found 574.2895;

The enantiomeric excess was determined to be 94.07% by HPLC. [IC column, 230 nm, n-hexane:IPA = 97:3, 0.5 mL/min]: 15.7 min (major), 20.4 min (minor);

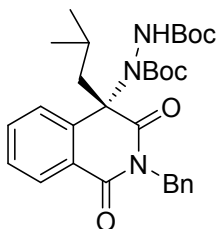

**di-tert-butyl(S)-1-(2-benzyl-4-isobutyl-1,3-dioxo-1,2,3,4-tetrahydroisoquinolin-4-yl)hydrazine-1,2-dicarboxylate (6c):**

White solid, 15.9 mg, 99% yield. mp: 139.9-141.1 °C;

Optical rotation:  $[\alpha]_{25.7}^D = -21.93$  (c 1.7, CHCl<sub>2</sub>);

<sup>1</sup>H NMR (CDCl<sub>3</sub>, 400 MHz):  $\delta$  8.23 (d,  $J = 7.7$  Hz, 1H), 8.17 (dd,  $J = 7.9, 0.9$  Hz, 1H), 7.66 – 7.59 (m, 1H), 7.49 – 7.37 (m, 3H), 7.33 – 7.09 (m, 4H), 6.71 (s, 1H), 5.12 (s, 2H), 2.00 (dd,  $J =$

13.6, 5.1 Hz, 1H), 1.84 (dd,  $J = 13.6, 4.4$  Hz, 1H), 1.52 (s, 18H), 0.44 (d,  $J = 6.6$  Hz, 3H), 0.39 (d,  $J = 6.7$  Hz, 3H);

$^{13}\text{C}$  NMR ( $\text{CDCl}_3$ , 100 MHz):  $\delta$  175.6, 164.1, 156.4, 143.3, 136.5, 134.3, 133.4, 128.4, 128.3, 127.6, 127.5, 126.0, 124.4, 82.9, 81.3, 49.9, 44.0, 28.3, 23.9, 22.9;

HRMS (ESI):  $\text{C}_{30}\text{H}_{39}\text{N}_3\text{O}_6\text{Na}$  for  $[\text{M}+\text{Na}]^+$ , calculated 560.2737, found 560.2736;

The enantiomeric excess was determined to be 80.55% by HPLC. [IC column, 230 nm, n-hexane:IPA = 97:3, 0.5 mL/min]: 13.8 min (major), 19.6 min (minor);

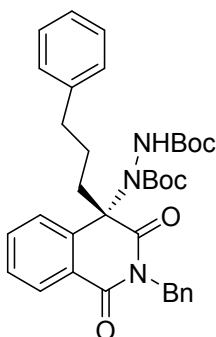

**di-tert-butyl(S)-1-(2-benzyl-1,3-dioxo-4-(3-phenylpropyl)-1,2,3,4-tetrahydroisoquinolin-4-yl)hydrazine-1,2-dicarboxylate(6d):**

White oil, 16.9 mg, 94% yield;

Optical rotation:  $[\alpha]_{26.2}^{\text{D}} = -17.88$  (c 0.9,  $\text{CHCl}_2$ );

$^1\text{H}$  NMR ( $\text{CDCl}_3$ , 400 MHz):  $\delta$  8.03 (d,  $J = 7.9$  Hz, 1H), 7.51 (s, 1H), 7.29 (dd,  $J = 17.6, 9.9$  Hz, 3H), 7.15 – 7.08 (m, 4H), 7.04 – 6.97 (m, 3H), 6.65 (d,  $J = 6.7$  Hz, 2H), 6.58 (s, 1H), 5.01 (dd,  $J = 37.3, 13.6$  Hz, 2H), 3.03 – 1.98 (m, 4H), 1.97 – 1.64 (m, 2H), 1.39 (s, 18H);

$^{13}\text{C}$  NMR ( $\text{CDCl}_3$ , 100 MHz):  $\delta$  175.5, 164.1, 154.1, 140.7, 136.6, 134.5, 129.5, 128.6, 128.4, 128.2, 128.1, 127.7, 125.9, 125.7, 124.5, 82.9, 81.4, 43.7, 35.4, 29.7, 28.3, 24.5;

HRMS (ESI):  $\text{C}_{35}\text{H}_{41}\text{N}_3\text{O}_6\text{Na}$  for  $[\text{M}+\text{Na}]^+$ , calculated 622.2893, found 622.2892;

The enantiomeric excess was determined to be 93.23% by HPLC. [IC column, 230 nm, n-hexane:IPA = 97:3, 1.0 mL/min]: 9.9 min (major), 15.8 min (minor);

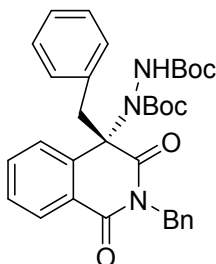

**(di-tert-butyl(S)-1-(2,4-dibenzyl-1,3-dioxo-1,2,3,4-tetrahydroisoquinolin-4-yl)hydrazine-1,2-dicarboxylate (6e):**

White solid, 17.0 mg, 99% yield. mp: 167.8-168.6 °C;

Optical rotation:  $[\alpha]_{25.6}^D = -15.24$  (c 1.8, CHCl<sub>2</sub>);

<sup>1</sup>H NMR (CDCl<sub>3</sub>, 400 MHz): δ 8.39 (d, *J* = 6.7 Hz, 1H), 7.77 (d, *J* = 7.7 Hz, 1H), 7.65 (t, *J* = 7.4 Hz, 1H), 7.39 – 7.24 (m, 3H), 7.15 (dd, *J* = 12.8, 5.3 Hz, 3H), 6.98 (dd, *J* = 12.6, 5.3 Hz, 1H), 6.79 (dd, *J* = 19.4, 11.8 Hz, 3H), 6.17 (d, *J* = 7.4 Hz, 2H), 4.85 (d, *J* = 13.5 Hz, 1H), 4.68 (d, *J* = 13.5 Hz, 1H), 3.58 (d, *J* = 12.0 Hz, 1H), 3.01 (d, *J* = 12.1 Hz, 1H), 1.48 (s, 18H);

<sup>13</sup>C NMR (CDCl<sub>3</sub>, 100 MHz): δ 174.9, 163.0, 156.7, 142.6, 137.5, 136.3, 134.2, 132.1, 130.0, 128.2, 127.7, 127.5, 125.8, 125.3, 124.3, 123.5, 83.1, 81.5, 47.4, 43.7, 28.3;

HRMS (ESI): C<sub>33</sub>H<sub>37</sub>N<sub>3</sub>O<sub>6</sub>Na for [M+Na]<sup>+</sup>, calculated 594.2580, found 594.2581;

The enantiomeric excess was determined to be 97.45% by HPLC. [IC column, 230 nm, n-hexane:IPA = 98:2, 0.3 mL/min]: 40.8 min (major), 48.0 min (minor);

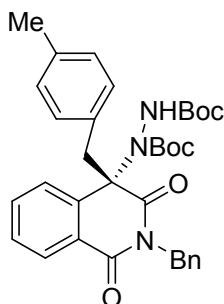

**di-tert-butyl(S)-1-(2-benzyl-4-(4-methylbenzyl)-1,3-dioxo-1,2,3,4-tetrahydroisoquinolin-4-yl)hydrazine-1,2-dicarboxylate (6f):**

Yellow solid, 17.4 mg, 99% yield. mp: 98.5-100.2 °C;

Optical rotation:  $[\alpha]_{25.1}^D = -7.91$  (c 1.6, CHCl<sub>2</sub>);

<sup>1</sup>H NMR (CDCl<sub>3</sub>, 400 MHz): δ 8.45 (d, *J* = 7.1 Hz, 1H), 7.90 – 7.83 (m, 1H), 7.71 (t, *J* = 7.1 Hz, 1H), 7.38 (dd, *J* = 14.8, 7.0 Hz, 3H), 7.23 (dd, *J* = 13.0, 5.5 Hz, 3H), 6.87 (s, 1H), 6.65 (d, *J* = 7.8 Hz, 2H), 6.13 (d, *J* = 7.9 Hz, 2H), 4.93 (d, *J* = 13.6 Hz, 1H), 4.77 (d, *J* = 13.6 Hz, 1H), 3.62 (d, *J* = 12.1 Hz, 1H), 3.05 (d, *J* = 12.2 Hz, 1H), 2.16 (s, 3H), 1.55 (s, 18H);

<sup>13</sup>C NMR (CDCl<sub>3</sub>, 100 MHz): δ 175.1, 163.1, 156.7, 142.8, 137.1, 136.4, 134.2, 129.8, 128.9, 128.5, 128.3, 127.7, 127.7, 127.7, 127.5, 125.8, 125.4, 83.1, 81.5, 47.1, 43.7, 28.3, 21.1;

HRMS (ESI): C<sub>34</sub>H<sub>39</sub>N<sub>3</sub>O<sub>6</sub>Na for [M+Na]<sup>+</sup>, calculated 608.2737, found 608.2736;

The enantiomeric excess was determined to be 91.50% by HPLC. [IA column, 230 nm, n-hexane:IPA = 90:10, 0.5 mL/min]: 22.6 min (major), 34.1 min (minor);

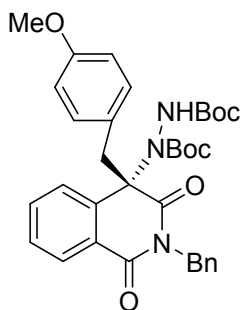

**di-tert-butyl(S)-1-(2-benzyl-4-(4-methoxybenzyl)-1,3-dioxo-1,2,3,4-tetrahydroisoquinolin-4-yl)hydrazine-1,2-dicarboxylate (6g):**

White solid, 16.2 mg, 90% yield. mp: 157.0-158.8 °C;

Optical rotation:  $[\alpha]_{25.5}^D = -2.82$  (c 1.4, CHCl<sub>2</sub>);

<sup>1</sup>H NMR (CDCl<sub>3</sub>, 400 MHz): δ 8.44 (d, *J* = 7.3 Hz, 1H), 7.90 – 7.85 (m, 1H), 7.71 (t, *J* = 7.3 Hz, 1H), 7.38 (dd, *J* = 18.8, 11.1 Hz, 3H), 7.25 – 7.20 (m, 3H), 6.88 (s, 1H), 6.34 (d, *J* = 8.6 Hz, 2H), 6.12 (d, *J* = 8.6 Hz, 2H), 4.93 (d, *J* = 13.5 Hz, 1H), 4.79 (d, *J* = 13.5 Hz, 1H), 3.64 (s, 3H), 3.02 (d, *J* = 12.4 Hz, 1H), 2.82 (dd, *J* = 38.9, 15.6 Hz, 1H), 1.54 (s, 18H);

<sup>13</sup>C NMR (CDCl<sub>3</sub>, 100 MHz): δ 175.1, 169.8, 163.1, 158.8, 142.8, 136.4, 134.2, 131.0, 129.5, 128.2, 127.7, 127.6, 127.5, 125.8, 125.3, 123.8, 113.2, 83.1, 81.5, 55.0, 43.7, 30.5, 28.3;

HRMS (ESI): C<sub>34</sub>H<sub>39</sub>N<sub>3</sub>O<sub>7</sub>Na for [M+Na]<sup>+</sup>, calculated 624.2686, found 624.2686;

The enantiomeric excess was determined to be 97.16% by HPLC. [OD-H column, 230 nm, n-hexane:IPA = 99:1, 0.5 mL/min]: 38.5 min (major), 55.2 min (minor);

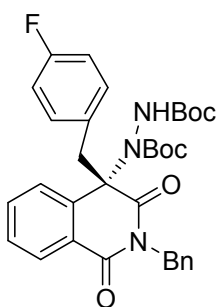

**di-tert-butyl(S)-1-(2-benzyl-4-(4-fluorobenzyl)-1,3-dioxo-1,2,3,4-tetrahydroisoquinolin-4-yl)hydrazine-1,2-dicarboxylate (6h):**

White solid, 17.0 mg, 96% yield. mp: 93.4-97.1 °C;

Optical rotation:  $[\alpha]_{25.4}^D = -10.00$  (c 1.6, CHCl<sub>2</sub>);

<sup>1</sup>H NMR (CDCl<sub>3</sub>, 400 MHz): δ 8.43 (d, *J* = 7.0 Hz, 1H), 7.87 (d, *J* = 7.1 Hz, 1H), 7.70 (t, *J* = 7.2 Hz, 1H), 7.38 (dd, *J* = 15.6, 7.8 Hz, 3H), 7.21 (dt, *J* = 7.6, 3.4 Hz, 3H), 6.84 (s, 1H), 6.46 (t, *J* =



8.6 Hz, 2H), 6.13 (dd,  $J = 8.4, 5.4$  Hz, 2H), 4.93 (d,  $J = 13.5$  Hz, 1H), 4.78 (d,  $J = 13.5$  Hz, 1H), 3.59 (d,  $J = 12.3$  Hz, 1H), 3.02 (d,  $J = 12.4$  Hz, 1H), 1.52 (s, 18H);

$^{13}\text{C}$  NMR ( $\text{CDCl}_3$ , 100 MHz):  $\delta$  174.9, 163.3, 163.0, 160.8, 142.5, 136.2, 134.4, 131.5 (d,  $J = 8.2$  Hz, 1H), 128.3, 127.9, 127.7, 125.8, 125.3, 114.9, 114.7, 83.2, 81.7, 46.6, 43.7, 28.3;

HRMS (ESI):  $\text{C}_{33}\text{H}_{36}\text{N}_3\text{O}_6\text{FNa}$  for  $[\text{M}+\text{Na}]^+$ , calculated 612.2486, found 612.2487;

The enantiomeric excess was determined to be 95.67% by HPLC. [OD-H column, 230 nm, n-hexane:IPA = 99:1, 0.5 mL/min]: 23.1 min (major), 32.4 min (minor);

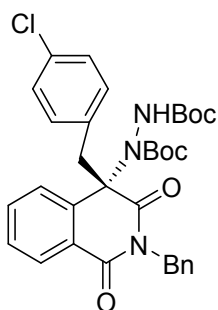

**di-tert-butyl(S)-1-(2-benzyl-4-(4-chlorobenzyl)-1,3-dioxo-1,2,3,4-tetrahydroisoquinolin-4-yl)hydrazine-1,2-dicarboxylate(6i):**

White solid, 18.0 mg, 99% yield. mp: 90.4-91.7 °C;

Optical rotation:  $[\alpha]_{25.8}^{\text{D}} = 1.93$  (c 1.7,  $\text{CHCl}_2$ );

$^1\text{H}$  NMR ( $\text{CDCl}_3$ , 400 MHz):  $\delta$  8.43 (d,  $J = 7.2$  Hz, 1H), 7.98 – 7.79 (m, 1H), 7.70 (t,  $J = 7.2$  Hz, 1H), 7.49 – 7.30 (m, 3H), 7.25 – 7.18 (m, 3H), 6.87 (s, 1H), 6.72 (d,  $J = 8.3$  Hz, 2H), 6.08 (d,  $J = 8.4$  Hz, 2H), 4.86 (dd,  $J = 63.1, 13.5$  Hz, 2H), 3.64 (dt,  $J = 36.6, 9.6$  Hz, 1H), 2.99 (t,  $J = 13.9$  Hz, 1H), 1.52 (s, 18H);

$^{13}\text{C}$  NMR ( $\text{CDCl}_3$ , 100 MHz):  $\delta$  174.7, 163.0, 156.7, 142.4, 136.2, 134.4, 133.4, 131.2, 130.6, 128.3, 127.9, 127.9, 127.6, 125.8, 125.2, 83.2, 81.7, 46.7, 43.6, 28.3;

HRMS (ESI):  $\text{C}_{33}\text{H}_{36}\text{N}_3\text{O}_6\text{ClNa}$  for  $[\text{M}+\text{Na}]^+$ , calculated 628.2190, found 628.2191;

The enantiomeric excess was determined to be 99.46% by HPLC. [OD-H column, 230 nm, n-hexane:IPA = 99:1, 0.3 mL/min]: 54.6 min (major), 68.4 min (minor);

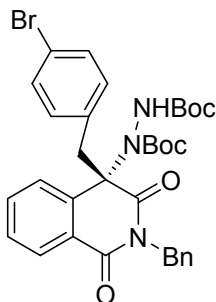

**di-tert-butyl(S)-1-(2-benzyl-4-(4-bromobenzyl)-1,3-dioxo-1,2,3,4-tetrahydroisoquinolin-4-yl)hydrazine-1,2-dicarboxylate (6j):**

White solid, 19.3 mg, 99% yield. mp: 141.0-142.3 °C;

Optical rotation:  $[\alpha]_{25.9}^D = 3.45$  (c 2.5, CHCl<sub>2</sub>);

<sup>1</sup>H NMR (CDCl<sub>3</sub>, 400 MHz): δ 8.43 (d, *J* = 7.2 Hz, 1H), 7.89 (d, *J* = 7.2 Hz, 1H), 7.70 (t, *J* = 7.2 Hz, 1H), 7.45 – 7.34 (m, 3H), 7.26 – 7.20 (m, 3H), 6.94 – 6.78 (m, 3H), 6.02 (d, *J* = 8.3 Hz, 2H), 4.94 (d, *J* = 13.5 Hz, 1H), 4.78 (d, *J* = 13.5 Hz, 1H), 3.56 (d, *J* = 12.2 Hz, 1H), 3.00 (d, *J* = 12.3 Hz, 1H), 1.52 (s, 18H);

<sup>13</sup>C NMR (CDCl<sub>3</sub>, 100 MHz): δ 174.7, 163.0, 156.7, 142.3, 136.2, 134.4, 133.4, 131.5, 131.1, 130.9, 130.1, 128.3, 127.9, 127.6, 125.8, 125.3, 121.6, 83.3, 81.7, 46.7, 43.6, 28.3;

HRMS (ESI): C<sub>33</sub>H<sub>36</sub>N<sub>3</sub>O<sub>6</sub>BrNa for [M+Na]<sup>+</sup>, calculated 672.1685, found 672.1687;

The enantiomeric excess was determined to be 98.96% by HPLC. [OD-H column, 230 nm, n-hexane:IPA = 99:1, 0.3 mL/min]: 57.6 min (major), 74.2 min (minor);

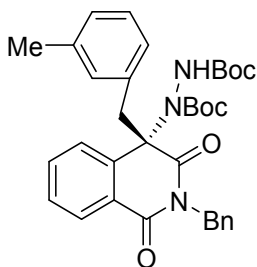

**di-tert-butyl(S)-1-(2-benzyl-4-(3-methylbenzyl)-1,3-dioxo-1,2,3,4-tetrahydroisoquinolin-4-yl)hydrazine-1,2-dicarboxylate (6k):**

White solid, 17.4 mg, 99% yield. mp: 87.9-90.3 °C;

Optical rotation:  $[\alpha]_{26.0}^D = -12.17$  (c 0.6, CHCl<sub>2</sub>);

<sup>1</sup>H NMR (CDCl<sub>3</sub>, 400 MHz): δ 8.48 (d, *J* = 7.2 Hz, 1H), 7.86 (d, *J* = 7.3 Hz, 1H), 7.73 (t, *J* = 7.2 Hz, 1H), 7.52 – 7.33 (m, 3H), 7.26 – 7.16 (m, 3H), 6.90 (s, 2H), 6.78 (t, *J* = 7.6 Hz, 1H), 6.12 (d, *J* = 7.6 Hz, 1H), 6.07 (s, 1H), 4.91 (d, *J* = 13.5 Hz, 1H), 4.75 (d, *J* = 13.5 Hz, 1H), 3.64 (d, *J* =

12.0 Hz, 1H), 3.07 (d,  $J = 12.1$  Hz, 1H), 2.04 (s, 3H), 1.56 (s, 18H);

$^{13}\text{C}$  NMR ( $\text{CDCl}_3$ , 100 MHz):  $\delta$  175.0, 163.0, 156.7, 142.8, 137.3, 136.4, 134.2, 132.1, 130.8, 128.3, 128.2, 127.6, 127.6, 127.5, 127.0, 125.7, 125.4, 124.0, 83.1, 81.5, 47.4, 43.7, 28.3, 21.0;

HRMS (ESI):  $\text{C}_{34}\text{H}_{39}\text{N}_3\text{O}_6\text{Na}$  for  $[\text{M}+\text{Na}]^+$ , calculated 608.2737, found 608.2736;

The enantiomeric excess was determined to be 75.98% by HPLC. [IC column, 230 nm, n-hexane:IPA = 97:3, 0.1 mL/min]: 98.6 min (major), 112.8 min (minor);

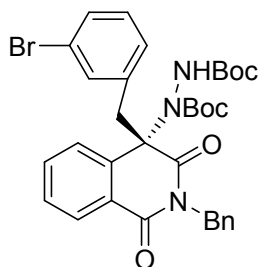

**di-tert-butyl(S)-1-(2-benzyl-4-(3-bromobenzyl)-1,3-dioxo-1,2,3,4-tetrahydroisoquinolin-4-yl)hydrazine-1,2-dicarboxylate (6l):**

White solid, 19.3 mg, 99% yield. mp: 96.7-97.7 °C;

Optical rotation:  $[\alpha]_{25.5}^{\text{D}} = -15.53$  (c 1.8,  $\text{CHCl}_2$ );

$^1\text{H}$  NMR ( $\text{CDCl}_3$ , 400 MHz):  $\delta$  8.46 (d,  $J = 6.9$  Hz, 1H), 7.90 (d,  $J = 7.8$  Hz, 1H), 7.75 (t,  $J = 7.6$  Hz, 1H), 7.42 (t,  $J = 7.5$  Hz, 3H), 7.26 – 7.19 (m, 4H), 6.87 (s, 1H), 6.70 (t,  $J = 7.8$  Hz, 1H), 6.45 (s, 1H), 6.19 (d,  $J = 7.6$  Hz, 1H), 4.95 (d,  $J = 13.6$  Hz, 1H), 4.82 (d,  $J = 13.6$  Hz, 1H), 3.63 (d,  $J = 11.9$  Hz, 1H), 3.05 (d,  $J = 12.2$  Hz, 1H), 1.56 (s, 18H);

$^{13}\text{C}$  NMR ( $\text{CDCl}_3$ , 100 MHz):  $\delta$  174.7, 162.8, 156.7, 142.3, 136.3, 134.6, 134.4, 133.1, 130.6, 129.2, 128.5, 128.3, 128.0, 127.8, 127.7, 127.6, 125.6, 125.2, 121.7, 83.3, 81.7, 47.1, 43.8, 28.3;

HRMS (ESI):  $\text{C}_{33}\text{H}_{36}\text{N}_3\text{O}_6\text{BrNa}$  for  $[\text{M}+\text{Na}]^+$ , calculated 672.1685, found 672.1688;

The enantiomeric excess was determined to be 88.55% by HPLC. [IC column, 230 nm, n-hexane:IPA = 97:3, 0.1 mL/min]: 101.3 min (major), 116.3 min (minor);

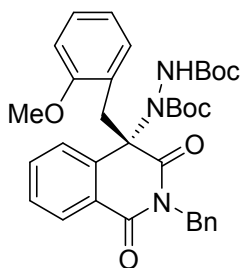

**di-tert-butyl(S)-1-(2-benzyl-4-(2-methoxybenzyl)-1,3-dioxo-1,2,3,4-tetrahydroisoquinolin-4-**

**yl)hydrazine-1,2-dicarboxylate (6m):**

White solid, 17.8 mg, 99% yield. mp: 93.9-95.0 °C;

Optical rotation:  $[\alpha]_{25.2}^D = -25.95$  (c 1.5, CHCl<sub>2</sub>);

<sup>1</sup>H NMR (CDCl<sub>3</sub>, 400 MHz): δ 8.37 (d, *J* = 7.0 Hz, 1H), 7.71 (d, *J* = 7.8 Hz, 1H), 7.59 (t, *J* = 7.5 Hz, 1H), 7.27 (dd, *J* = 33.1, 25.7 Hz, 3H), 7.18 – 7.10 (m, 3H), 7.04 – 6.99 (m, 1H), 6.87 (s, 1H), 6.52 (d, *J* = 8.2 Hz, 1H), 6.41 (t, *J* = 7.4 Hz, 1H), 6.08 (d, *J* = 6.9 Hz, 1H), 4.87 (d, *J* = 11.4 Hz, 1H), 4.72 (d, *J* = 13.5 Hz, 1H), 3.70 (d, *J* = 11.9 Hz, 1H), 3.38 (s, 3H), 3.07 (d, *J* = 12.2 Hz, 1H), 1.49 (s, 18H);

<sup>13</sup>C NMR (CDCl<sub>3</sub>, 100 MHz): δ 175.0, 163.2, 157.6, 156.8, 142.9, 136.6, 133.6, 132.1, 130.2, 129.2, 129.1, 128.3, 128.2, 127.3, 127.3, 126.1, 124.8, 120.7, 119.7, 109.6, 82.9, 81.4, 54.8, 44.0, 29.7, 28.3;

HRMS (ESI): C<sub>34</sub>H<sub>39</sub>N<sub>3</sub>O<sub>7</sub>Na for [M+Na]<sup>+</sup>, calculated 624.2686, found 624.2687;

The enantiomeric excess was determined to be 92.88% by HPLC. [OD-H column, 230 nm, n-hexane:IPA = 97:3, 0.5 mL/min]: 18.6 min (major), 33.9 min (minor);

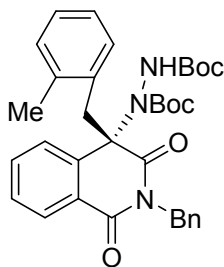

**di-tert-butyl(S)-1-(2-benzyl-4-(2-methylbenzyl)-1,3-dioxo-1,2,3,4-tetrahydroisoquinolin-4-yl)hydrazine-1,2-dicarboxylate (6n):**

White solid, 16.1mg, 92% yield. mp: 180.6-181.8 °C;

Optical rotation:  $[\alpha]_{25.5}^D = -36.42$  (c 1.8, CHCl<sub>2</sub>);

<sup>1</sup>H NMR (CDCl<sub>3</sub>, 400 MHz): δ 8.56 (d, *J* = 7.1 Hz, 1H), 7.88 (d, *J* = 7.8 Hz, 1H), 7.69 (t, *J* = 7.5 Hz, 1H), 7.40 (t, *J* = 7.5 Hz, 3H), 7.24 – 7.15 (m, 3H), 7.01 (t, *J* = 7.4 Hz, 1H), 6.95 (s, 1H), 6.87 (d, *J* = 7.6 Hz, 1H), 6.75 (t, *J* = 7.5 Hz, 1H), 6.23 (d, *J* = 7.2 Hz, 1H), 4.93 (d, *J* = 12.9 Hz, 1H), 4.75 (d, *J* = 13.6 Hz, 1H), 3.83 – 3.70 (m, 1H), 3.16 (d, *J* = 12.5 Hz, 1H), 1.59 (d, *J* = 15.4 Hz, 21H);

<sup>13</sup>C NMR (CDCl<sub>3</sub>, 100 MHz): δ 175.1, 171.1, 163.0, 142.6, 138.0, 136.3, 134.1, 133.2, 133.2, 131.1, 130.4, 130.3, 128.2, 127.7, 127.6, 127.5, 126.3, 125.2, 125.0, 83.1, 81.5, 43.9, 28.3, 18.6, 14.2;

HRMS (ESI): C<sub>34</sub>H<sub>39</sub>N<sub>3</sub>O<sub>6</sub>Na for [M+Na]<sup>+</sup>, calculated 608.2737, found 608.2736;

The enantiomeric excess was determined to be 92.67% by HPLC. [IA column, 230 nm, n-hexane:IPA = 95:5, 0.5 mL/min]: 39.3 min (major), 44.1 min (minor);

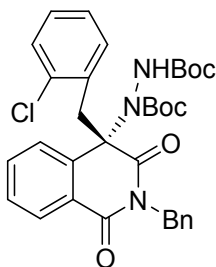

**di-tert-butyl(S)-1-(2-benzyl-4-(2-chlorobenzyl)-1,3-dioxo-1,2,3,4-tetrahydroisoquinolin-4-yl)hydrazine-1,2-dicarboxylate (6o):**

White solid, 11.5 mg, 95% yield. mp: 186.6-187.6 °C;

Optical rotation:  $[\alpha]_{25.4}^D = -31.43$  (c 1.4, CHCl<sub>2</sub>);

<sup>1</sup>H NMR (CDCl<sub>3</sub>, 400 MHz): δ 8.40 (d, *J* = 7.0 Hz, 1H), 7.73 (d, *J* = 7.3 Hz, 1H), 7.60 (t, *J* = 7.2 Hz, 1H), 7.29 (d, *J* = 7.9 Hz, 2H), 7.11 (ddd, *J* = 27.1, 15.6, 8.1 Hz, 5H), 6.94 (td, *J* = 7.9, 1.5 Hz, 1H), 6.87 (s, 1H), 6.62 (t, *J* = 7.4 Hz, 1H), 5.98 (d, *J* = 7.5 Hz, 1H), 4.96 (d, *J* = 13.4 Hz, 1H), 4.77 (d, *J* = 13.7 Hz, 1H), 3.90 (d, *J* = 12.6 Hz, 1H), 3.12 (d, *J* = 12.7 Hz, 1H), 1.48 (s, 18H);

<sup>13</sup>C NMR (CDCl<sub>3</sub>, 100 MHz): δ 174.4, 163.0, 156.8, 136.5, 135.6, 134.1, 132.5, 130.5, 129.3, 129.0, 128.2, 127.8, 126.1, 125.9, 125.1, 83.2, 81.6, 44.4, 28.3, 27.2;

HRMS (ESI): C<sub>33</sub>H<sub>36</sub>N<sub>3</sub>O<sub>6</sub>ClNa for [M+Na]<sup>+</sup>, calculated 628.2190, found 628.2191;

The enantiomeric excess was determined to be 98.04% by HPLC. [OD-H column, 230 nm, n-hexane:IPA = 97:3, 0.5 mL/min]: 14.1 min (major), 18.7 min (minor);

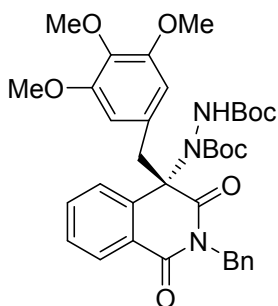

**di-tert-butyl(S)-1-(2-benzyl-1,3-dioxo-4-(3,4,5-trimethoxybenzyl)-1,2,3,4-tetrahydroisoquinolin-4-yl)hydrazine-1,2-dicarboxylate (6p):**

Yellow solid, 19.6 mg, 99% yield. mp: 103.7-105.3 °C;

Optical rotation:  $[\alpha]_{26.0}^D = -15.32$  (c 1.9, CHCl<sub>2</sub>);

$^1\text{H}$  NMR ( $\text{CDCl}_3$ , 400 MHz):  $\delta$  8.50 (d,  $J = 7.6$  Hz, 1H), 7.96 – 7.89 (m, 1H), 7.74 (dd,  $J = 11.1$ , 4.1 Hz, 1H), 7.45 – 7.12 (m, 7H), 6.90 (s, 1H), 5.56 (s, 2H), 4.91 (d,  $J = 13.4$  Hz, 1H), 4.79 (d,  $J = 13.5$  Hz, 1H), 3.74 (s, 3H), 3.64 (d,  $J = 12.2$  Hz, 1H), 3.48 (s, 6H), 3.07 (d,  $J = 12.3$  Hz, 1H), 1.56 (s, 18H);

$^{13}\text{C}$  NMR ( $\text{CDCl}_3$ , 100 MHz):  $\delta$  174.9, 162.7, 156.7, 152.4, 142.9, 137.6, 136.2, 134.2, 128.3, 127.8, 127.6, 127.6, 127.5, 125.9, 125.7, 107.2, 83.2, 81.6, 60.9, 55.8, 47.5, 43.8, 28.3;

HRMS (ESI):  $\text{C}_{36}\text{H}_{44}\text{N}_3\text{O}_9$  for  $[\text{M}+\text{H}]^+$ , calculated 662.3078, found 662.3077;

The enantiomeric excess was determined to be 86.97% by HPLC. [IA column, 230 nm, n-hexane:IPA = 80:20, 1.0 mL/min]: 11.9min (major), 25.5 min (minor);

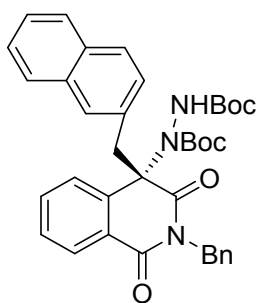

**di-tert-butyl(S)-1-(2-benzyl-4-(naphthalen-2-ylmethyl)-1,3-dioxo-1,2,3,4-tetrahydroisoquinolin-4-yl)hydrazine-1,2-dicarboxylate (6q):**

Yellow solid, 18.4 mg, 99% yield. mp: 104.8-105.2  $^\circ\text{C}$ ;

Optical rotation:  $[\alpha]_{25.7}^{\text{D}} = 11.76$  (c 0.7,  $\text{CHCl}_2$ );

$^1\text{H}$  NMR ( $\text{CDCl}_3$ , 400 MHz):  $\delta$  8.56 (d,  $J = 7.2$  Hz, 1H), 7.78 (t,  $J = 8.6$  Hz, 2H), 7.67 (d,  $J = 7.9$  Hz, 1H), 7.47 – 7.29 (m, 7H), 7.23 – 7.16 (m, 3H), 6.98 (s, 1H), 6.80 (s, 1H), 6.36 (dd,  $J = 8.4$ , 1.2 Hz, 1H), 4.93 (d,  $J = 13.6$  Hz, 1H), 4.66 (d,  $J = 13.6$  Hz, 1H), 3.85 (d,  $J = 12.1$  Hz, 1H), 3.28 (d,  $J = 12.2$  Hz, 1H), 1.58 (s, 18H);

$^{13}\text{C}$  NMR ( $\text{CDCl}_3$ , 100 MHz):  $\delta$  175.0, 171.1, 162.8, 142.7, 136.3, 134.3, 132.7, 132.3, 129.7, 129.3, 128.2, 127.7, 127.5, 127.5, 127.3, 126.0, 126.0, 125.9, 125.2, 83.2, 81.6, 43.7, 29.7, 28.3;

HRMS (ESI):  $\text{C}_{37}\text{H}_{39}\text{N}_3\text{O}_6\text{Na}$  for  $[\text{M}+\text{Na}]^+$ , calculated 644.2737, found 644.2739;

The enantiomeric excess was determined to be >99.00% by HPLC. [IA column, 230 nm, n-hexane:IPA = 97:3, 0.5 mL/min]: 128.6 min (major);

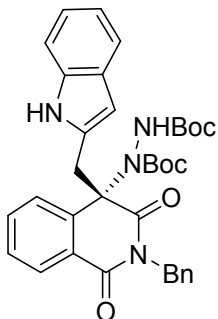

**di-tert-butyl(S)-1-(4-((1H-indol-2-yl)methyl)-2-benzyl-1,3-dioxo-1,2,3,4-tetrahydroisoquinolin-4-yl)hydrazine-1,2-dicarboxylate (6r):**

Yellow oil, 16.5 mg, 90% yield;

Optical rotation:  $[\alpha]_{25.8}^D = 3.70$  (c 1.1, CHCl<sub>2</sub>);

<sup>1</sup>H NMR (CDCl<sub>3</sub>, 400 MHz):  $\delta$  8.39 (d, *J* = 7.6 Hz, 1H), 7.94 (d, *J* = 7.8 Hz, 1H), 7.73 (t, *J* = 7.6 Hz, 1H), 7.42 (dd, *J* = 16.2, 7.8 Hz, 3H), 7.27 (d, *J* = 9.4 Hz, 5H), 6.97 (dq, *J* = 13.6, 7.7 Hz, 5H), 5.04 (d, *J* = 13.6 Hz, 1H), 4.87 (d, *J* = 13.6 Hz, 1H), 3.74 – 3.68 (m, 1H), 3.34 (d, *J* = 13.7 Hz, 1H), 1.45 (s, 18H);

<sup>13</sup>C NMR (CDCl<sub>3</sub>, 100 MHz):  $\delta$  175.0, 162.9, 156.9, 136.3, 135.9, 134.3, 129.6, 129.1, 128.4, 128.4, 128.0, 127.6, 125.3, 124.9, 121.9, 120.2, 119.7, 110.4, 104.1, 83.4, 81.9, 43.8, 29.7, 28.3;

HRMS (ESI): C<sub>35</sub>H<sub>39</sub>N<sub>4</sub>O<sub>6</sub> for [M+H]<sup>+</sup>, calculated 611.2870, found 611.2871;

The enantiomeric excess was determined to be 81.97% by HPLC. [OD-H column, 230 nm, n-hexane:IPA = 97:3, 0.3 mL/min]: 71.4 min (major), 89.4 min (minor);

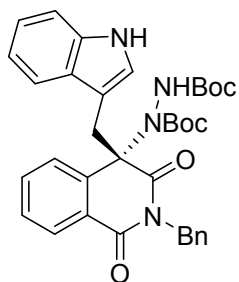

**di-tert-butyl(S)-1-(4-((1H-indol-3-yl)methyl)-2-benzyl-1,3-dioxo-1,2,3,4-tetrahydroisoquinolin-4-yl)hydrazine-1,2-dicarboxylate (6s):**

Yellow oil, 18.1 mg, 99% yield;

Optical rotation:  $[\alpha]_{25.8}^D = 35.76$  (c 0.9, CHCl<sub>2</sub>);

<sup>1</sup>H NMR (CDCl<sub>3</sub>, 400 MHz):  $\delta$  8.47 (d, *J* = 7.3 Hz, 1H), 7.79 (s, 1H), 7.72 (d, *J* = 7.8 Hz, 1H), 7.65 (t, *J* = 7.5 Hz, 1H), 7.29 (d, *J* = 7.5 Hz, 1H), 7.19 (s, 1H), 7.16 – 7.07 (m, 5H), 7.01 (t, *J* = 7.5 Hz, 2H), 6.94 (s, 1H), 6.88 (t, *J* = 7.4 Hz, 1H), 5.72 (s, 1H), 4.57 (d, *J* = 13.7 Hz, 1H), 4.20 (d,

$J = 13.7$  Hz, 1H), 3.92 (d,  $J = 13.0$  Hz, 1H), 3.16 (d,  $J = 13.2$  Hz, 1H), 1.51 (s, 18H);

$^{13}\text{C}$  NMR ( $\text{CDCl}_3$ , 100 MHz):  $\delta$  171.2, 163.2, 156.7, 143.5, 140.8, 136.6, 135.3, 134.1, 130.1, 130.1, 129.9, 129.8, 128.1, 127.5, 127.3, 125.6, 124.3, 122.0, 119.6, 117.9, 111.1, 106.2, 83.0, 81.5, 43.7, 37.5, 28.3;

HRMS (ESI):  $\text{C}_{35}\text{H}_{38}\text{N}_4\text{O}_6\text{Na}$  for  $[\text{M}+\text{Na}]^+$ , calculated 633.2689, found 633.2689;

The enantiomeric excess was determined to be 99.34% by HPLC. [IA column, 230 nm, n-hexane:IPA = 95:5, 1.0 mL/min]: 35.1 min (major), 47.5 min (minor);

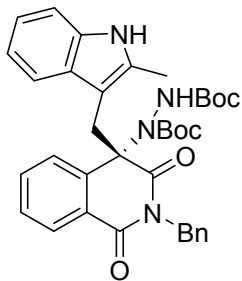

**di-tert-butyl(S)-1-(2-benzyl-4-((2-methyl-1H-indol-3-yl)methyl)-1,3-dioxo-1,2,3,4-tetrahydroisoquinolin-4-yl)hydrazine-1,2-dicarboxylate (6t):**

Yellow solid, 18.5 mg, 99% yield. mp: 80.3-81.8 °C;

Optical rotation:  $[\alpha]_{25.0}^D = -13.33$  (c 0.8,  $\text{CHCl}_2$ );

$^1\text{H}$  NMR ( $\text{CDCl}_3$ , 400 MHz):  $\delta$  8.56 (s, 1H), 7.88 (s, 1H), 7.80 (s, 1H), 7.67 (s, 1H), 7.42 (d,  $J = 16.5$  Hz, 2H), 7.10 (s, 9H), 4.42 (d,  $J = 11.7$  Hz, 1H), 4.13 (dd,  $J = 7.3, 3.0$  Hz, 1H), 3.86 (d,  $J = 13.2$  Hz, 1H), 3.06 (d,  $J = 11.4$  Hz, 1H), 1.35 (d,  $J = 191.9$  Hz, 21H);

$^{13}\text{C}$  NMR ( $\text{CDCl}_3$ , 100 MHz):  $\delta$  175.3, 157.2, 154.2, 143.6, 136.8, 135.4, 134.9, 134.1, 130.1, 128.8, 128.2, 127.6, 126.3, 126.0, 125.4, 121.6, 119.5, 117.8, 110.5, 102.2, 83.1, 81.7, 44.0, 28.4, 27.0, 9.8;

HRMS (ESI):  $\text{C}_{36}\text{H}_{40}\text{N}_4\text{O}_6\text{Na}$  for  $[\text{M}+\text{Na}]^+$ , calculated 647.2846, found 647.2846;

The enantiomeric excess was determined to be 95.55% by HPLC. [IC column, 230 nm, n-hexane:IPA = 97:3, 0.5 mL/min]: 67.0 min (major), 84.3 min (minor);

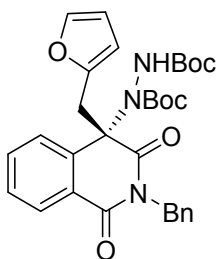

**di-tert-butyl(S)-1-(2-benzyl-4-(furan-2-ylmethyl)-1,3-dioxo-1,2,3,4-tetrahydroisoquinolin-4-**



**yl)hydrazine-1,2-dicarboxylate (6u):**

White solid, 16.7 mg, 99% yield. mp: 81.8-82.1 °C;

Optical rotation:  $[\alpha]_{25.7}^D = -4.96$  (c 1.1, CHCl<sub>2</sub>);

<sup>1</sup>H NMR (CDCl<sub>3</sub>, 400 MHz):  $\delta$  8.24 (d,  $J = 7.1$  Hz, 1H), 7.87 (d,  $J = 7.8$  Hz, 1H), 7.58 (t,  $J = 7.5$  Hz, 1H), 7.37 (s, 2H), 7.28 (t,  $J = 7.5$  Hz, 1H), 7.18 – 7.10 (m, 3H), 6.77 (d,  $J = 10.9$  Hz, 2H), 5.85 (s, 1H), 5.10 (d,  $J = 2.7$  Hz, 1H), 4.89 (t,  $J = 9.9$  Hz, 2H), 3.61 (dd,  $J = 10.5, 2.9$  Hz, 1H), 3.07 (d,  $J = 13.8$  Hz, 1H), 2.03 – 0.77 (m, 18H);

<sup>13</sup>C NMR (CDCl<sub>3</sub>, 100 MHz):  $\delta$  174.7, 163.3, 156.6, 146.8, 142.3, 136.5, 136.0, 134.3, 128.2, 127.8, 127.7, 127.5, 125.4, 124.8, 119.5, 110.3, 109.9, 83.2, 81.6, 44.0, 40.2, 28.2;

HRMS (ESI): C<sub>31</sub>H<sub>35</sub>N<sub>3</sub>O<sub>7</sub>Na for [M+Na]<sup>+</sup>, calculated 584.2373, found 584.2371;

The enantiomeric excess was determined to be 96.95% by HPLC. [IC column, 230 nm, n-hexane:IPA = 97:3, 0.5 mL/min]: 20.2 min (major), 26.9 min (minor);

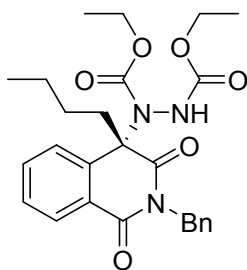

**diethyl (S)-1-(2-benzyl-4-butyl-1,3-dioxo-1,2,3,4-tetrahydroisoquinolin-4-yl)hydrazine-1,2-dicarboxylate (6v):**

White oil, 13.7 mg, 95% yield;

Optical rotation:  $[\alpha]_{20.3}^D = -3.98$  (c 1.7, CHCl<sub>3</sub>);

<sup>1</sup>H NMR (CDCl<sub>3</sub>, 400 MHz):  $\delta$  8.24 – 8.18 (m, 2H), 7.65 (dd,  $J = 11.1, 4.2$  Hz, 1H), 7.44 (dd,  $J = 6.8, 4.1$  Hz, 3H), 7.29 – 7.27 (m, 1H), 7.26 – 7.19 (m, 2H), 6.95 (s, 1H), 5.25 (d,  $J = 13.8$  Hz, 1H), 5.12 (d,  $J = 13.8$  Hz, 1H), 4.29 (dddd,  $J = 17.7, 10.6, 7.1, 3.5$  Hz, 2H), 3.91 (s, 2H), 2.19 (dd,  $J = 12.1, 8.8$  Hz, 1H), 1.82 (td,  $J = 12.6, 4.1$  Hz, 1H), 1.55 – 1.12 (m, 5H), 1.11 – 0.70 (m, 5H), 0.58 (t,  $J = 7.3$  Hz, 3H);

<sup>13</sup>C NMR (CDCl<sub>3</sub>, 100 MHz):  $\delta$  175.4, 164.0, 157.2, 155.6, 142.5, 136.6, 134.6, 128.8, 128.3, 127.8, 127.5, 125.4, 124.7, 68.5, 63.1, 62.3, 43.7, 24.9, 22.4, 14.5, 13.5;

HRMS (ESI): C<sub>26</sub>H<sub>32</sub>N<sub>3</sub>O<sub>6</sub> for [M+H]<sup>+</sup>, calculated 482.2291, found 482.2292;

The enantiomeric excess was determined to be 53.35% by HPLC. [IB column, 230 nm, n-hexane:IPA = 95:5, 0.5 mL/min]: 16.67, min (major), 25.9 min (minor);

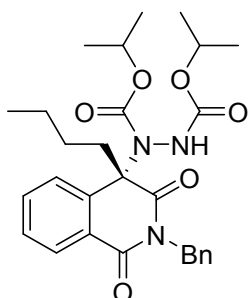

**diisopropyl (S)-1-(2-benzyl-4-butyl-1,3-dioxo-1,2,3,4-tetrahydroisoquinolin-4-yl)hydrazine-1,2-dicarboxylate (6w):**

White oil, 14.2 mg, 93% yield;

Optical rotation:  $[\alpha]_{21.6}^D = 3.09$  (c 1.3,  $\text{CHCl}_3$ );

$^1\text{H NMR}$  ( $\text{CDCl}_3$ , 400 MHz):  $\delta$  8.22 (t,  $J = 7.8$  Hz, 2H), 7.66 (t,  $J = 7.4$  Hz, 1H), 7.48 – 7.42 (m, 3H), 7.30 – 7.27 (m, 2H), 7.25 – 7.20 (m, 1H), 6.84 (s, 1H), 5.23 (d,  $J = 13.7$  Hz, 1H), 5.13 (d,  $J = 13.8$  Hz, 1H), 5.06 (dt,  $J = 12.4, 6.2$  Hz, 1H), 4.61 (s, 1H), 1.95 (ddd,  $J = 34.1, 21.4, 10.3$  Hz, 2H), 1.44 – 1.25 (m, 8H), 1.19 – 0.70 (m, 8H), 0.59 (t,  $J = 7.3$  Hz, 3H);

$^{13}\text{C NMR}$  ( $\text{CDCl}_3$ , 100 MHz):  $\delta$  175.4, 164.1, 157.1, 155.1, 142.8, 136.6, 134.5, 133.8, 128.3, 128.3, 127.7, 127.5, 125.5, 124.6, 71.2, 70.1, 43.7, 24.9, 22.4, 22.0, 21.9, 13.5;

HRMS (ESI):  $\text{C}_{28}\text{H}_{36}\text{N}_3\text{O}_6$  for  $[\text{M}+\text{H}]^+$ , calculated 510.2604, found 510.2603;

The enantiomeric excess was determined to be 76.84% by HPLC. [IA column, 230 nm, n-hexane:IPA = 85:15, 1.0 mL/min]: 7.3 min (major), 12.4 min (minor);

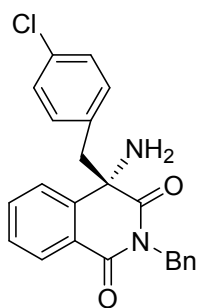

**(R)-N-benzyl-1-(4-chlorobenzyl)-3-oxoisindoline-1-carboxamide (7):**

Yellow oil, 10.1 mg, 86% yield;

Optical rotation:  $[\alpha]_{25.6}^D = -6.27$  (c 0.5,  $\text{CHCl}_2$ );

$^1\text{H NMR}$  ( $\text{CDCl}_3$ , 400 MHz):  $\delta$  8.03 (dd,  $J = 7.9, 1.1$  Hz, 1H), 7.83 – 7.75 (m, 1H), 7.62 (td,  $J = 7.7, 1.4$  Hz, 1H), 7.42 (td,  $J = 7.8, 1.2$  Hz, 1H), 7.31 (dd,  $J = 7.7, 1.8$  Hz, 2H), 7.25 – 7.18 (m, 4H), 6.85 – 6.70 (m, 2H), 6.31 – 6.09 (m, 2H), 4.97 (d,  $J = 13.7$  Hz, 1H), 4.84 (d,  $J = 13.7$  Hz, 1H), 3.05 (d,  $J = 12.8$  Hz, 1H), 2.91 (d,  $J = 12.8$  Hz, 1H);

$^{13}\text{C}$  NMR ( $\text{CDCl}_3$ , 100 MHz):  $\delta$  176.9, 163.4, 140.9, 136.5, 134.1, 133.2, 132.1, 130.9, 129.5, 128.5, 128.4, 128.1, 127.7, 126.1, 125.5, 61.3, 52.1, 43.8;

HRMS (ESI):  $\text{C}_{23}\text{H}_{20}\text{N}_2\text{O}_2\text{Cl}$  for  $[\text{M}+\text{H}]^+$ , calculated 391.1213, found 391.1214;

The enantiomeric excess was determined to be 97.36% by HPLC. [IB column, 230 nm, n-hexane:IPA = 95:5, 1.0 mL/min]: 18.4 min (major), 20.6 min (minor);

## 7. Crystal data and structure refinement for 6I.

|                                             |                                                                 |
|---------------------------------------------|-----------------------------------------------------------------|
| Identification code                         | 6I                                                              |
| Empirical formula                           | C <sub>33</sub> H <sub>36</sub> ClN <sub>3</sub> O <sub>6</sub> |
| Formula weight                              | 606.10                                                          |
| Temperature/K                               | 293(2)                                                          |
| Crystal system                              | monoclinic                                                      |
| Space group                                 | P2 <sub>1</sub>                                                 |
| a/Å                                         | 10.7532(4)                                                      |
| b/Å                                         | 22.6105(9)                                                      |
| c/Å                                         | 13.3665(6)                                                      |
| α/°                                         | 90                                                              |
| β/°                                         | 93.588(4)                                                       |
| γ/°                                         | 90                                                              |
| Volume/Å <sup>3</sup>                       | 3243.5(2)                                                       |
| Z                                           | 4                                                               |
| ρ <sub>calc</sub> /cm <sup>3</sup>          | 1.241                                                           |
| μ/mm <sup>-1</sup>                          | 1.427                                                           |
| F(000)                                      | 1280.0                                                          |
| Crystal size/mm <sup>3</sup>                | 0.13 × 0.12 × 0.11                                              |
| Radiation                                   | CuKα (λ = 1.54184)                                              |
| 2θ range for data collection/°              | 6.626 to 147.29                                                 |
| Index ranges                                | -13 ≤ h ≤ 13, -27 ≤ k ≤ 27, -1 ≤ l ≤ 16                         |
| Reflections collected                       | 10317                                                           |
| Independent reflections                     | 10317 [R <sub>int</sub> = ?, R <sub>sigma</sub> = 0.0491]       |
| Data/restraints/parameters                  | 10317/8/788                                                     |
| Goodness-of-fit on F <sup>2</sup>           | 1.061                                                           |
| Final R indexes [I ≥ 2σ (I)]                | R <sub>1</sub> = 0.0750, wR <sub>2</sub> = 0.2168               |
| Final R indexes [all data]                  | R <sub>1</sub> = 0.0785, wR <sub>2</sub> = 0.2191               |
| Largest diff. peak/hole / e Å <sup>-3</sup> | 1.09/-0.56                                                      |
| Flack/Hooft parameter                       | 0.028(11)/0.037(9)                                              |

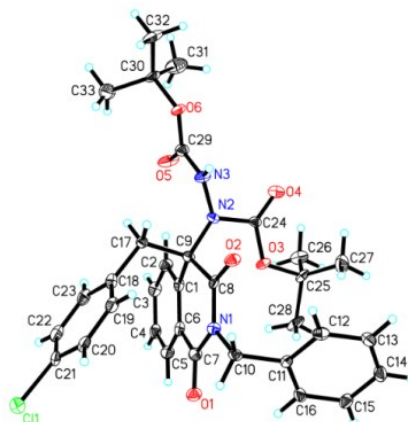

### Crystal structure determination of [6I]

**Crystal Data** for C<sub>33</sub>H<sub>36</sub>ClN<sub>3</sub>O<sub>6</sub> (*M* = 606.10 g/mol): monoclinic, space group P2<sub>1</sub> (no. 4), *a* = 10.7532(4) Å, *b* = 22.6105(9) Å, *c* = 13.3665(6) Å, β = 93.588(4)°, *V* = 3243.5(2) Å<sup>3</sup>, *Z* = 4, *T* = 293(2) K, μ(CuKα) = 1.427 mm<sup>-1</sup>, *D*<sub>calc</sub> = 1.241 g/cm<sup>3</sup>, 10317 reflections measured (6.626° ≤ 2θ ≤ 147.29°), 10317 unique (*R*<sub>int</sub> = 0.0313, *R*<sub>sigma</sub> = 0.0491) which were used in all calculations. The final *R*<sub>1</sub> was 0.0750 (*I* > 2σ(*I*)) and *wR*<sub>2</sub> was 0.2191 (all data).

## 8. $^1\text{H}$ and $^{13}\text{C}$ NMR Spectra

### 2-benzyl-4-isopentylisoquinoline-1,3(2H,4H)-dione (4b):

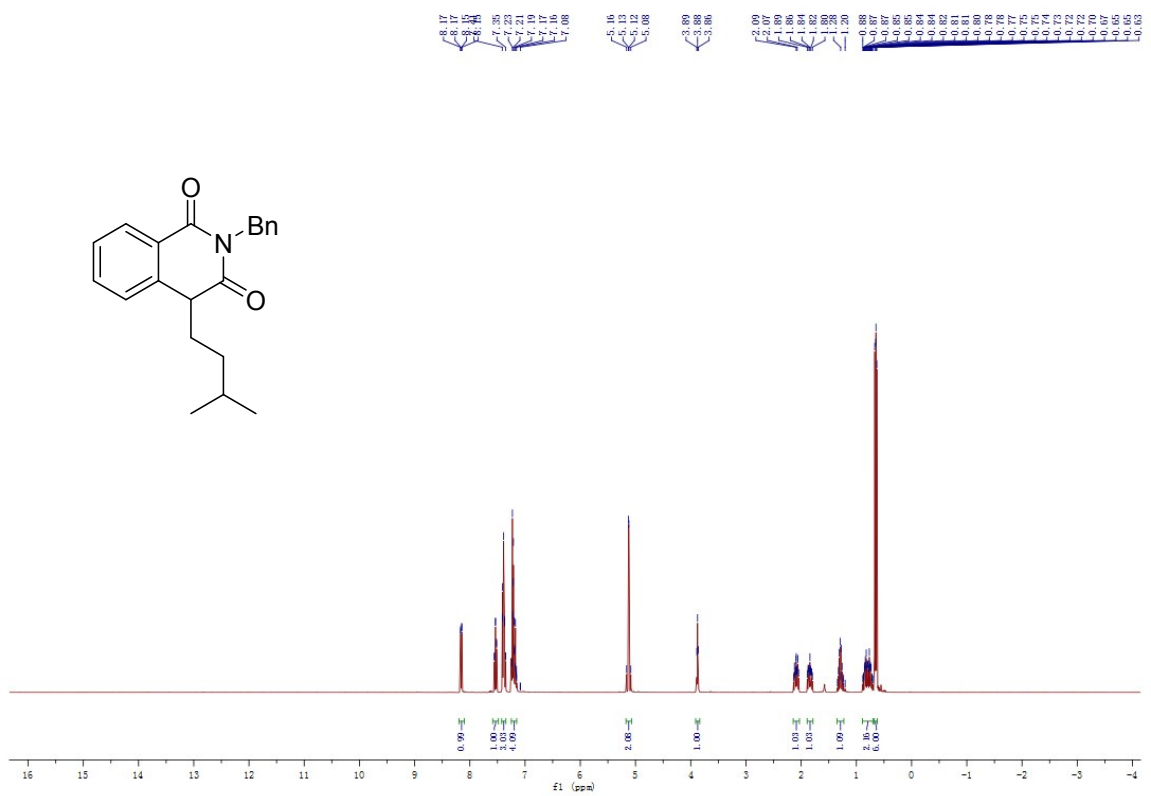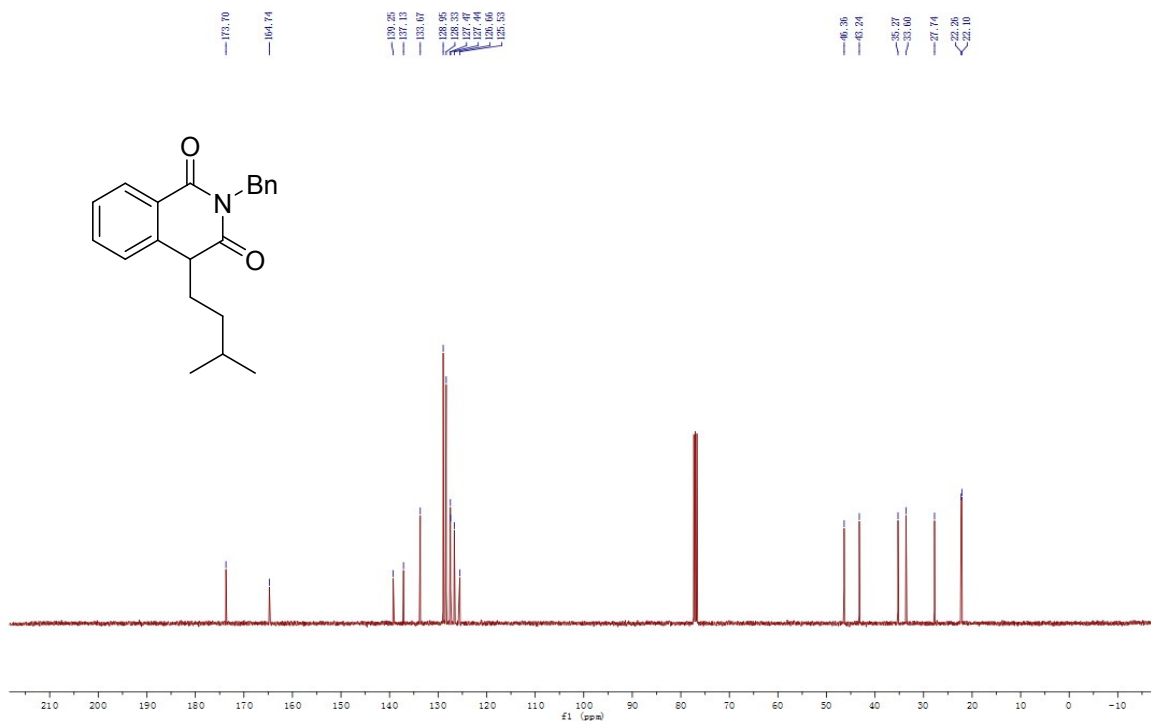

### 2-benzyl-4-(3-phenylpropyl)isoquinoline-1,3(2H,4H)-dione (4d):

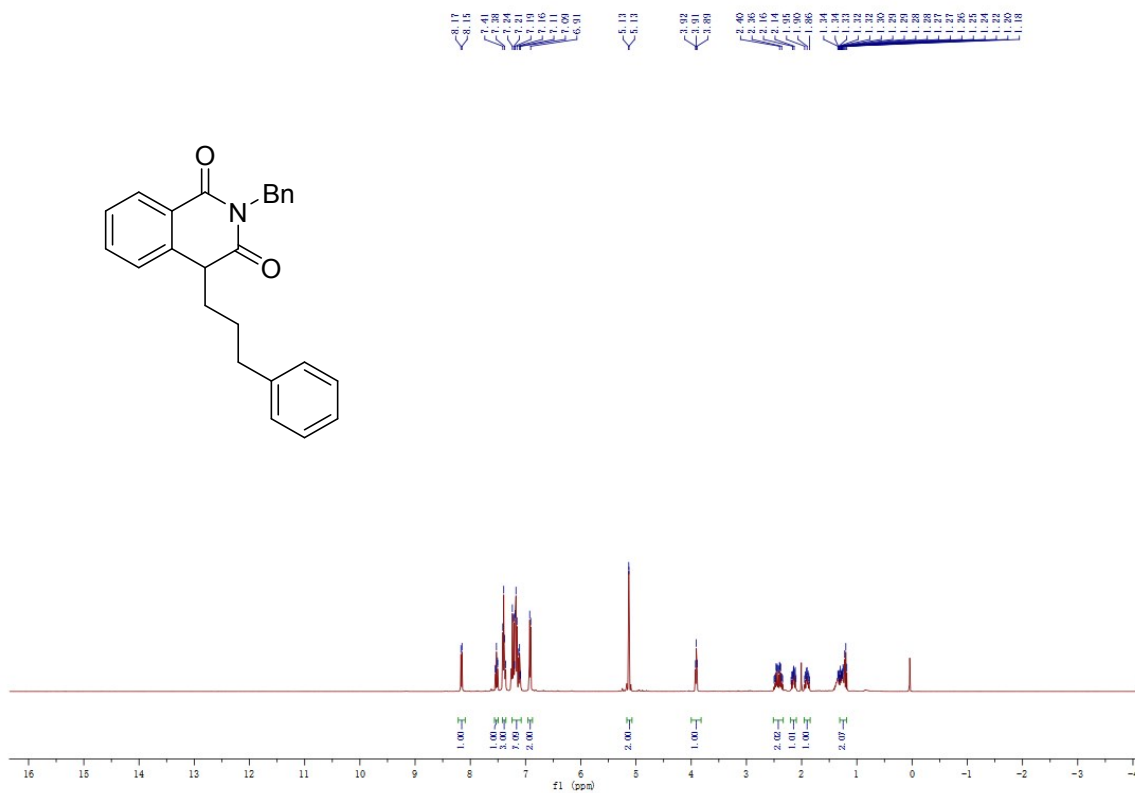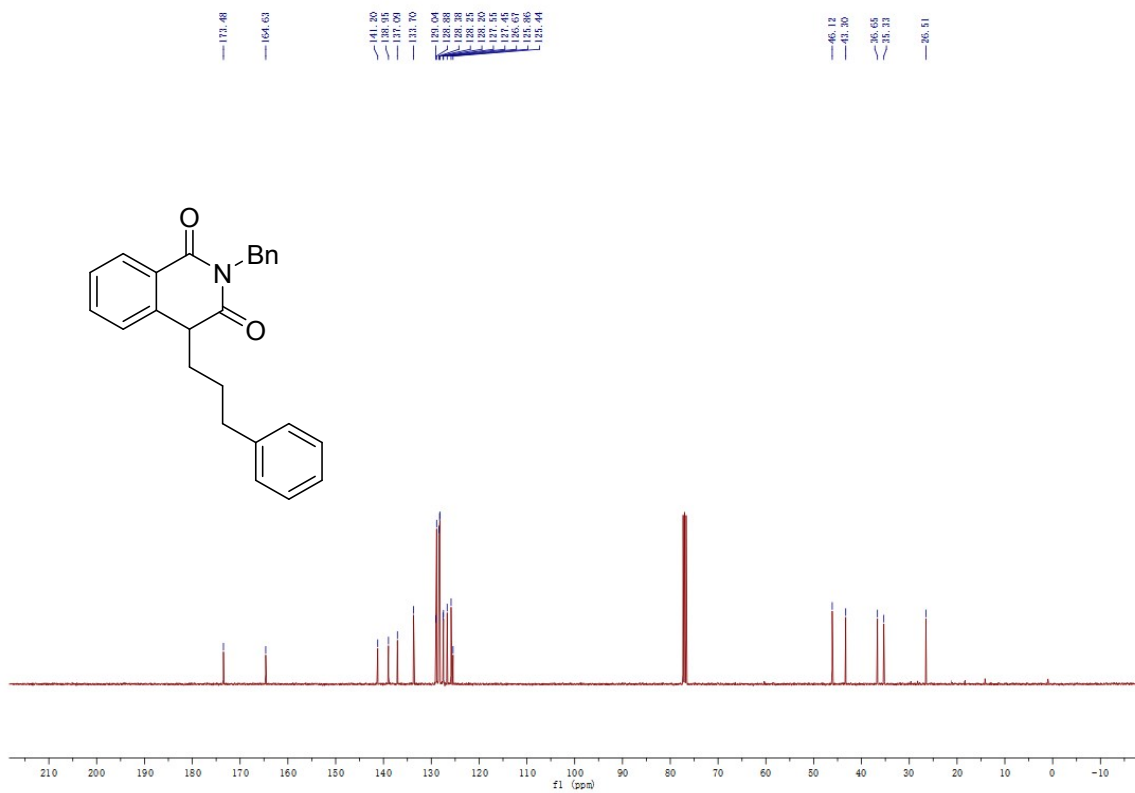

**2-benzyl-4-(4-chlorobenzyl)isoquinoline-1,3(2H,4H)-dione (4i):**

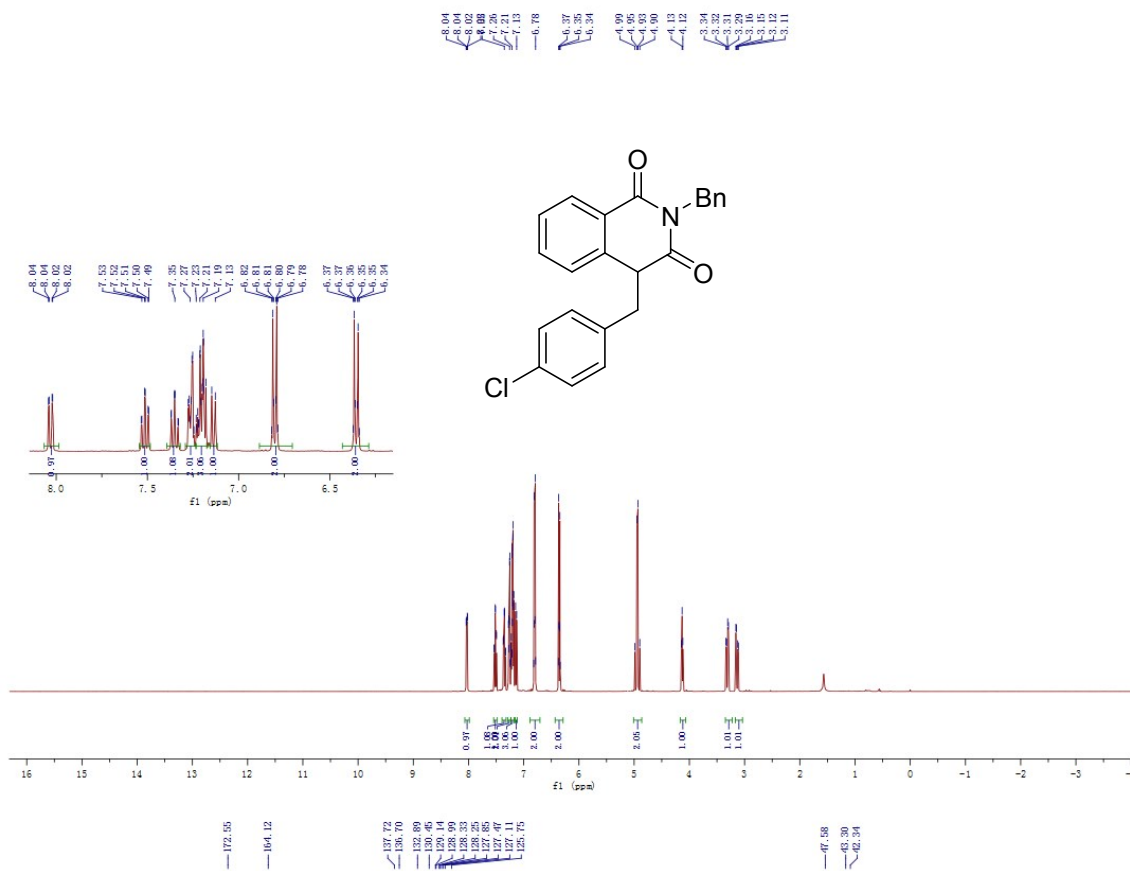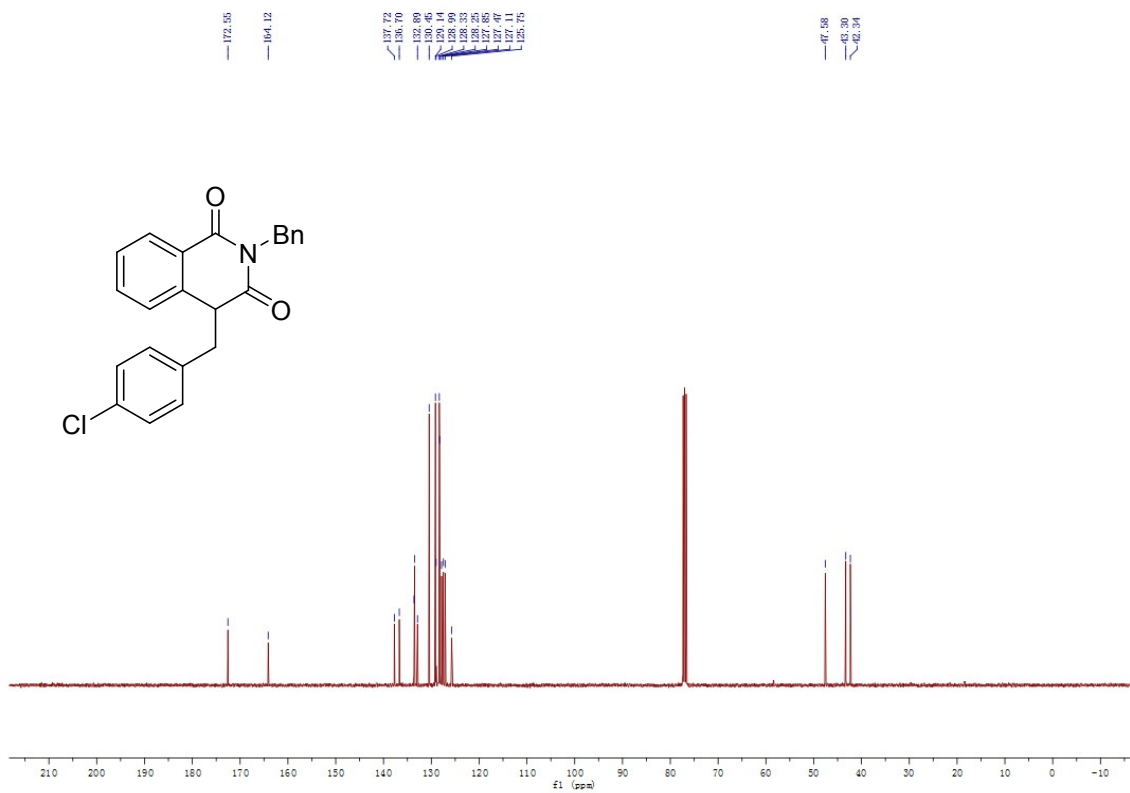

**2-benzyl-4-(4-bromobenzyl)isoquinoline-1,3(2H,4H)-dione (4j):**

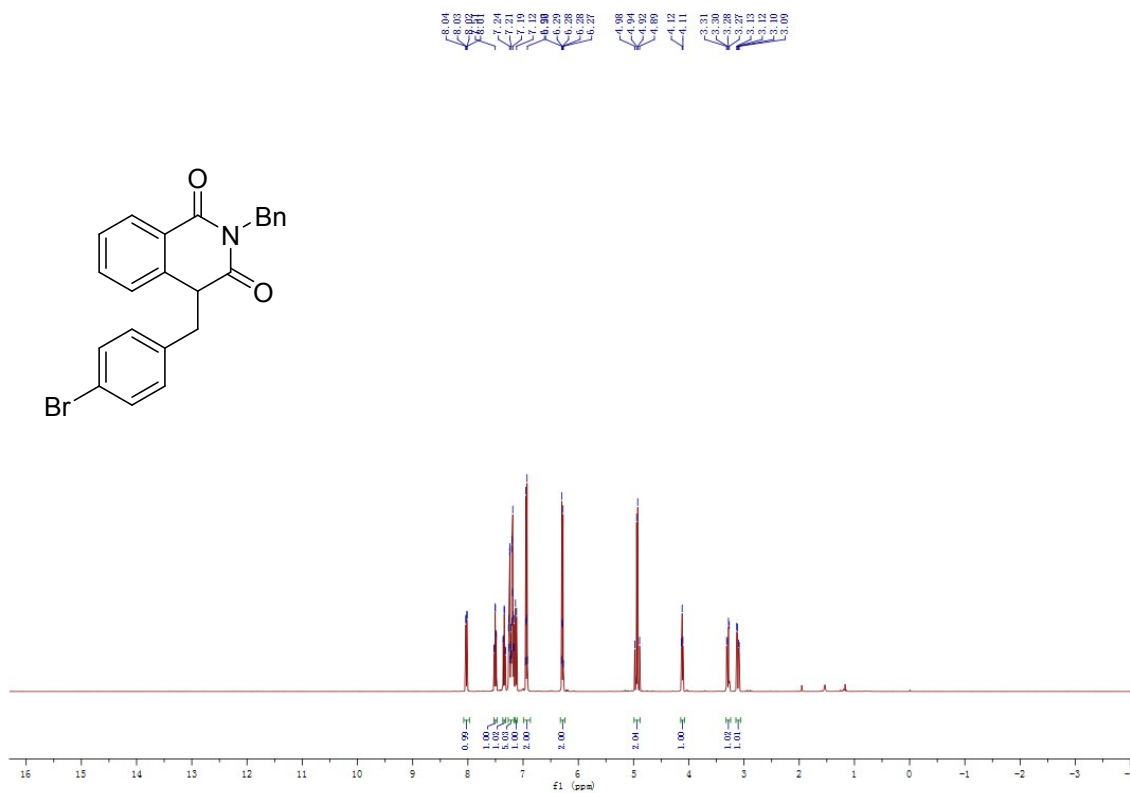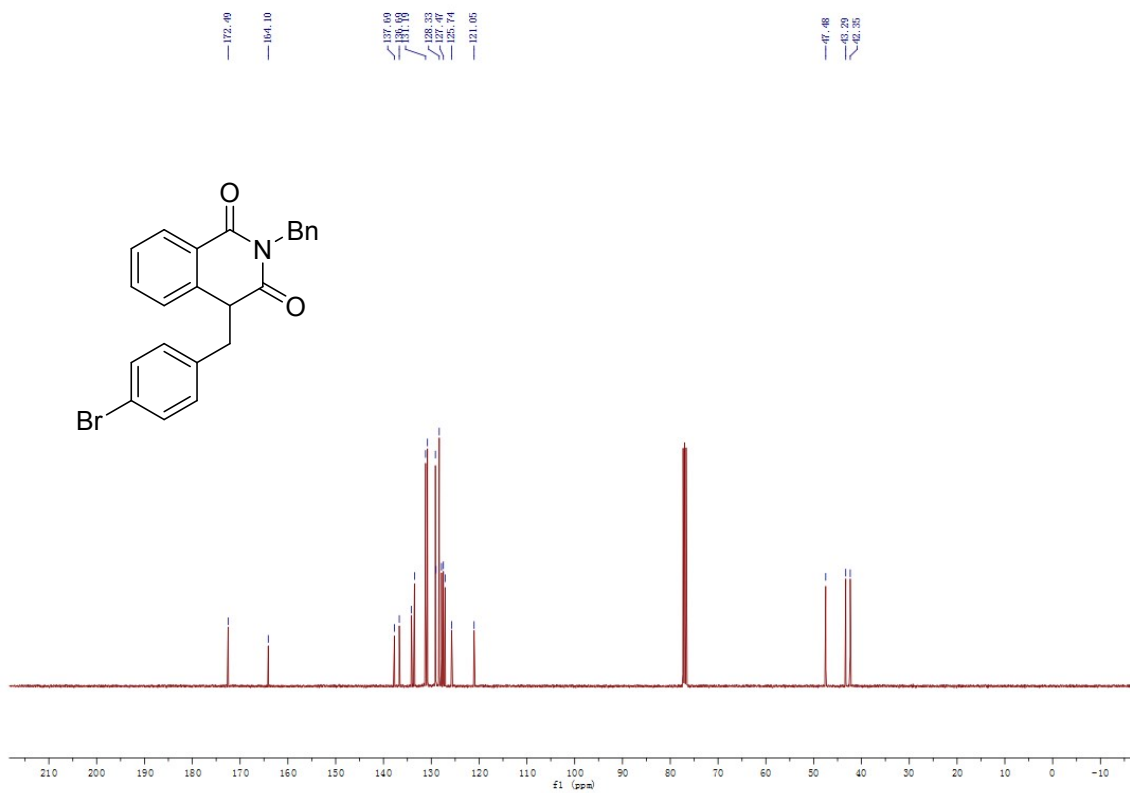



**2-benzyl-4-(3-methylbenzyl)isoquinoline-1,3(2H,4H)-dione (4k):**

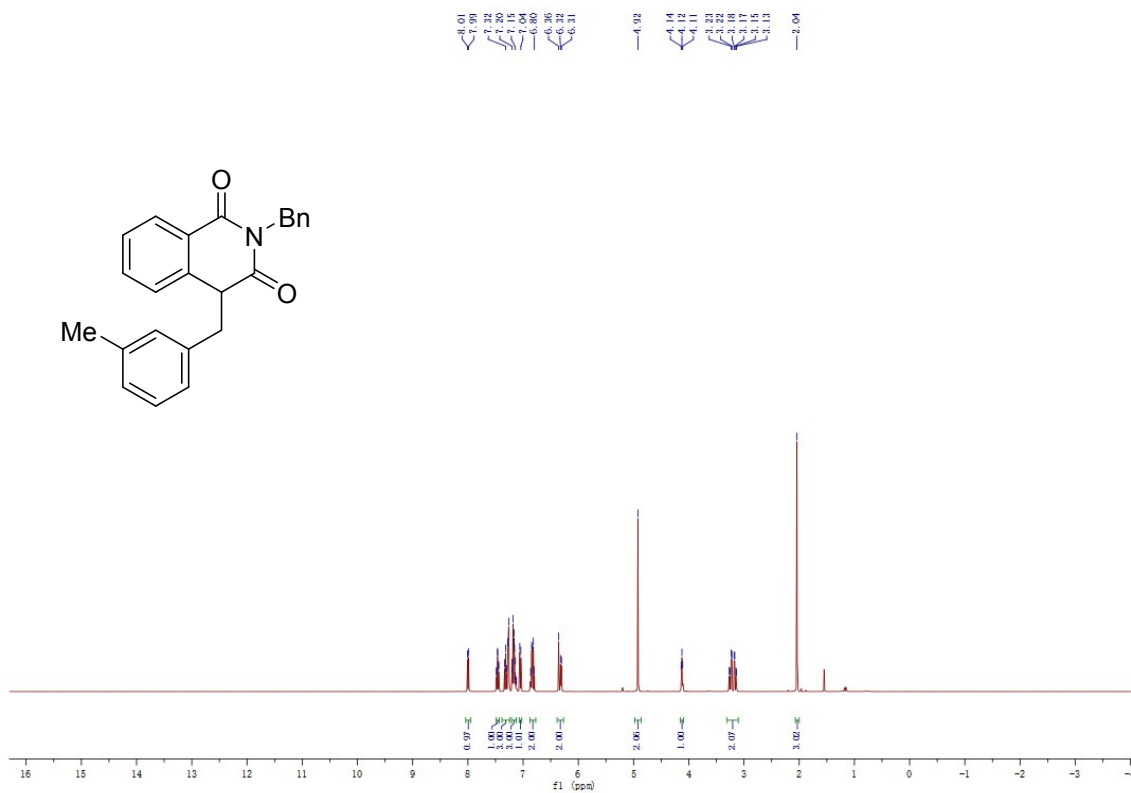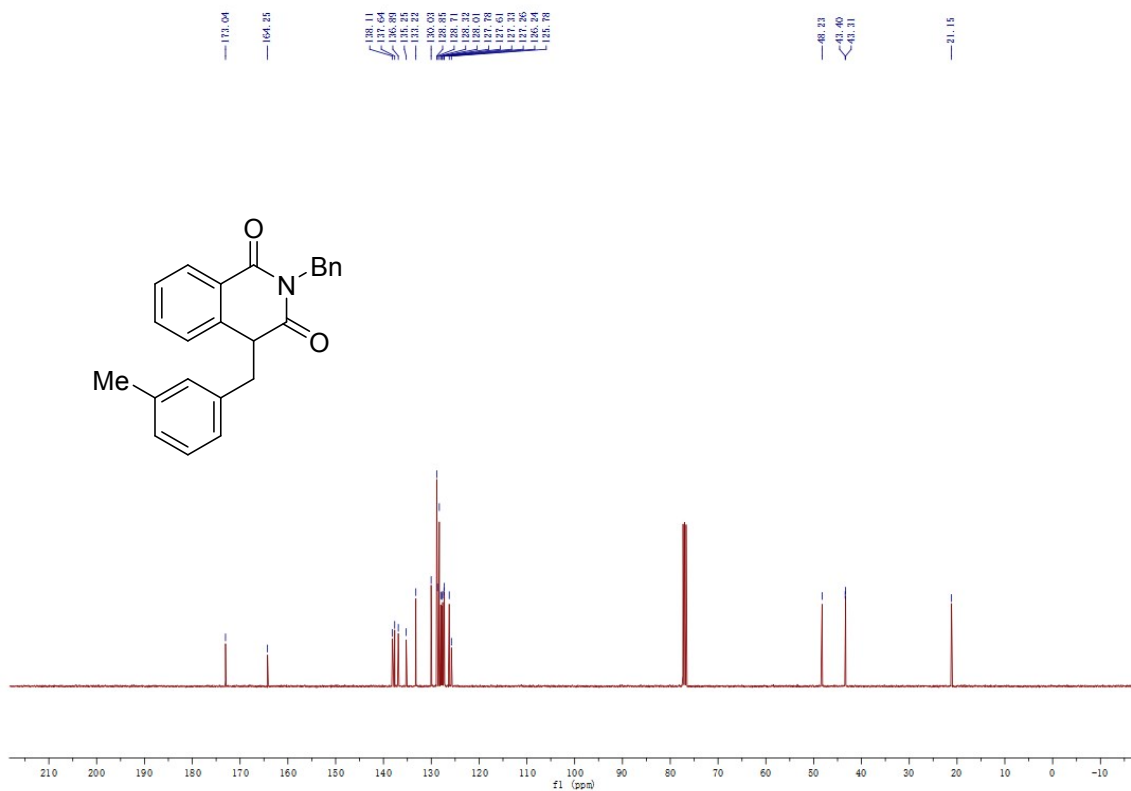

**2-benzyl-4-(3-bromobenzyl)isoquinoline-1,3(2H,4H)-dione (4l):**

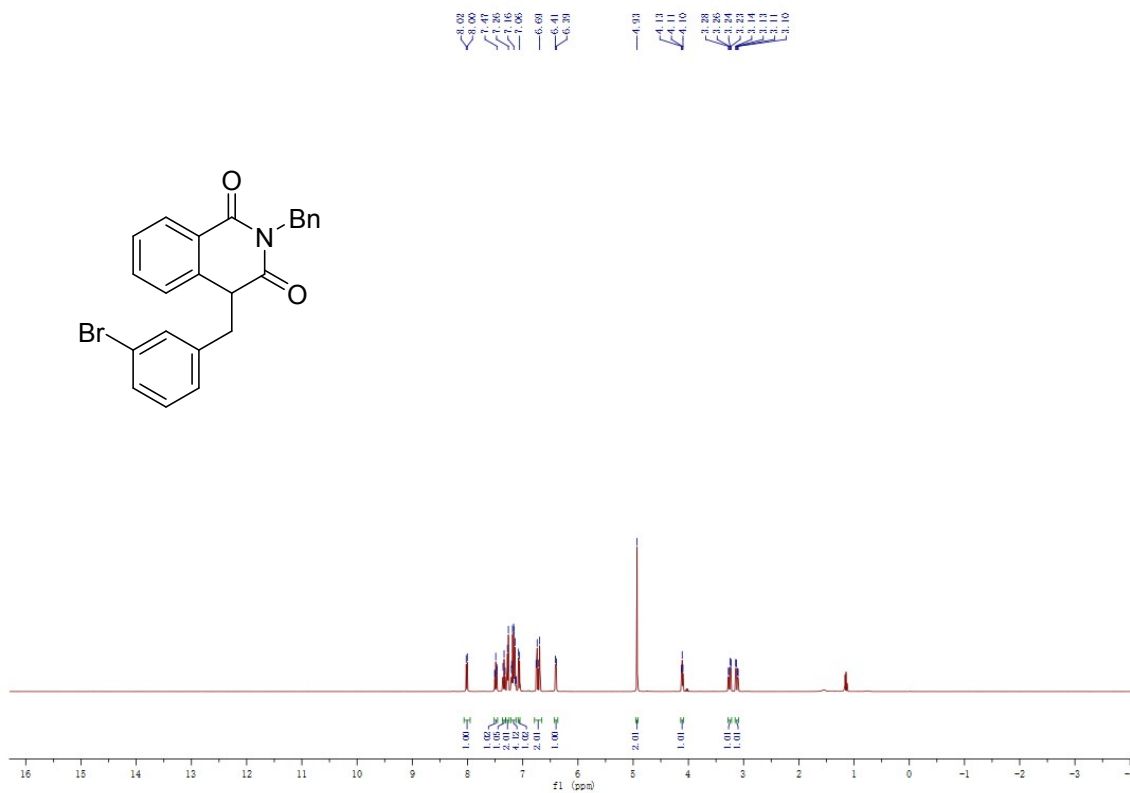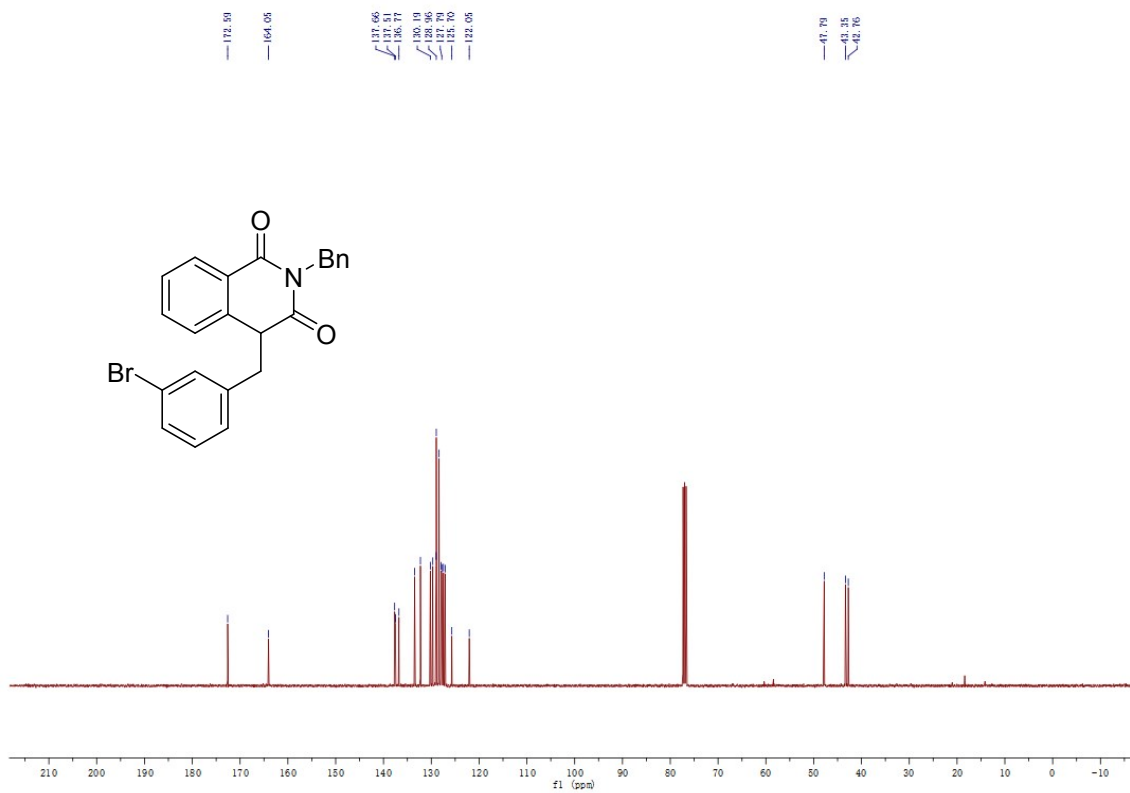

**2-benzyl-4-(2-methoxybenzyl)isoquinoline-1,3(2H,4H)-dione (4m):**

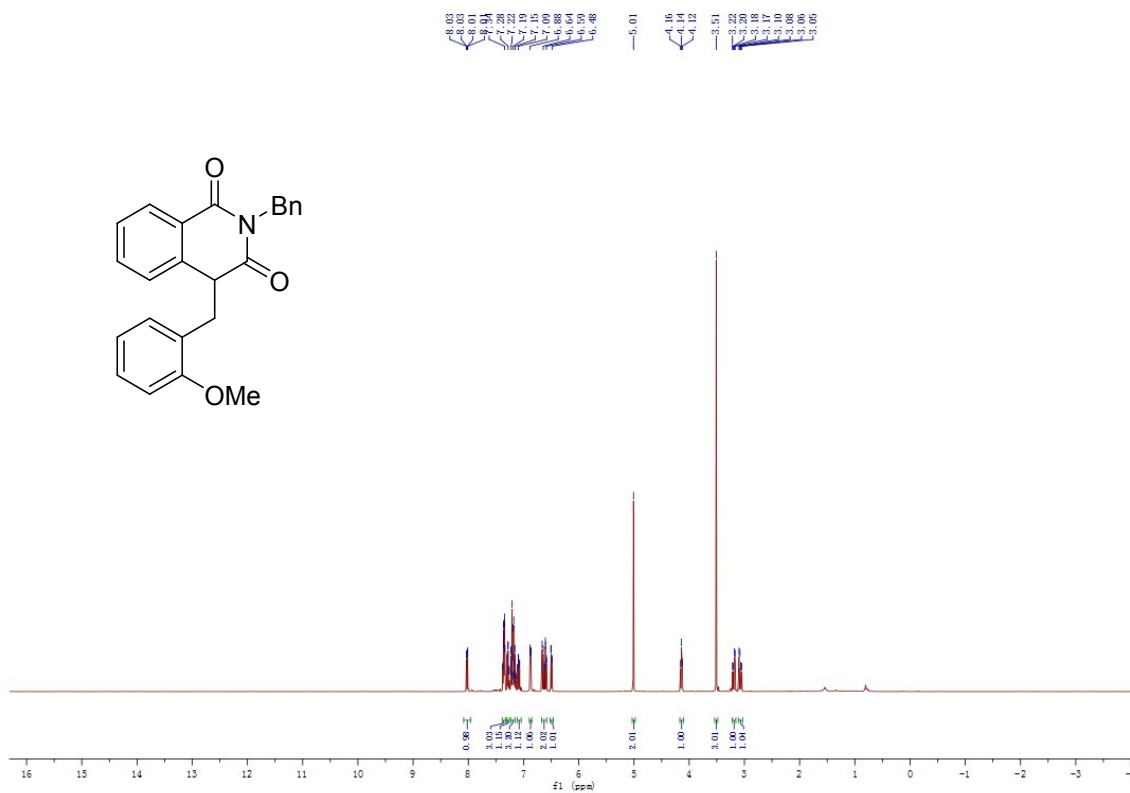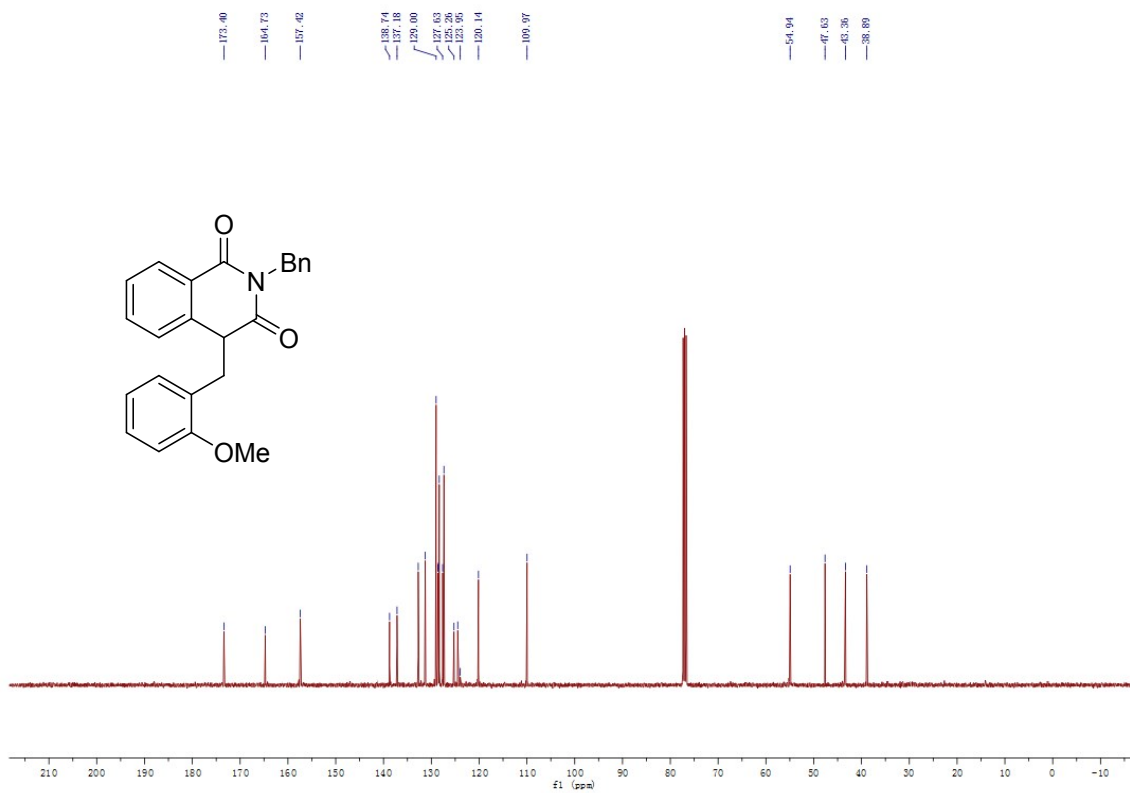



**2-benzyl-4-(2-chlorobenzyl)isoquinoline-1,3(2H,4H)-dione (4o):**

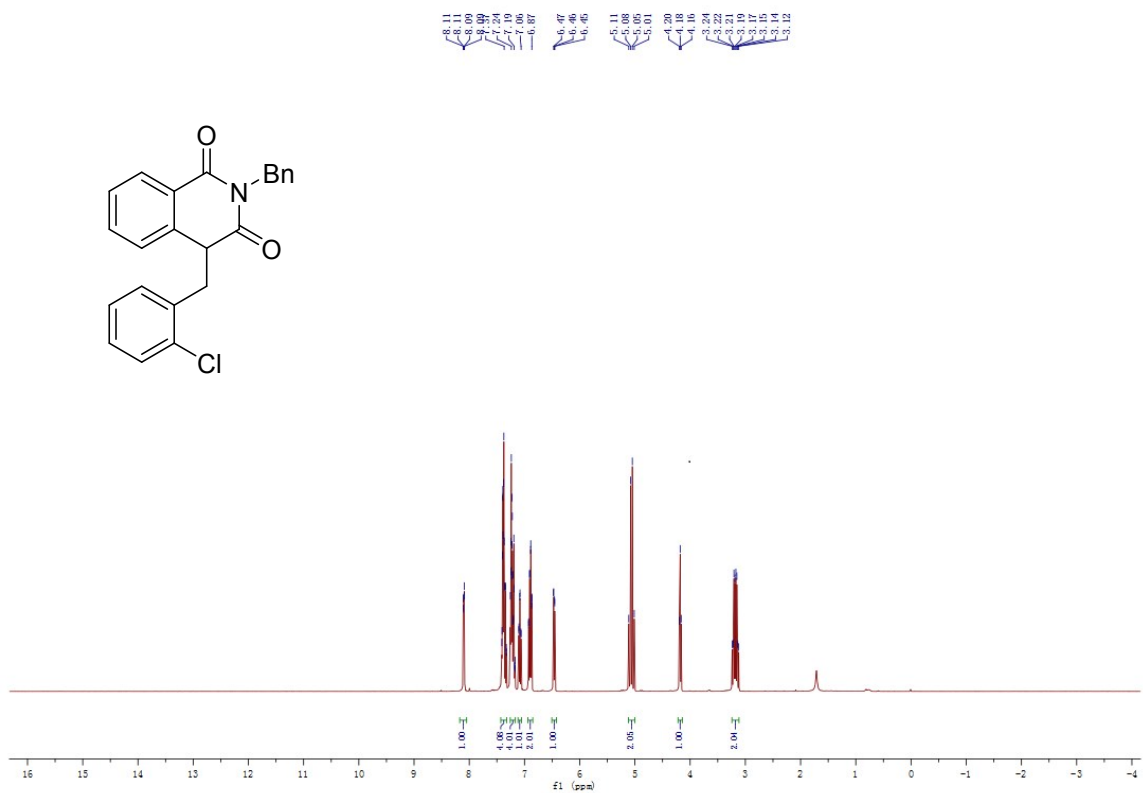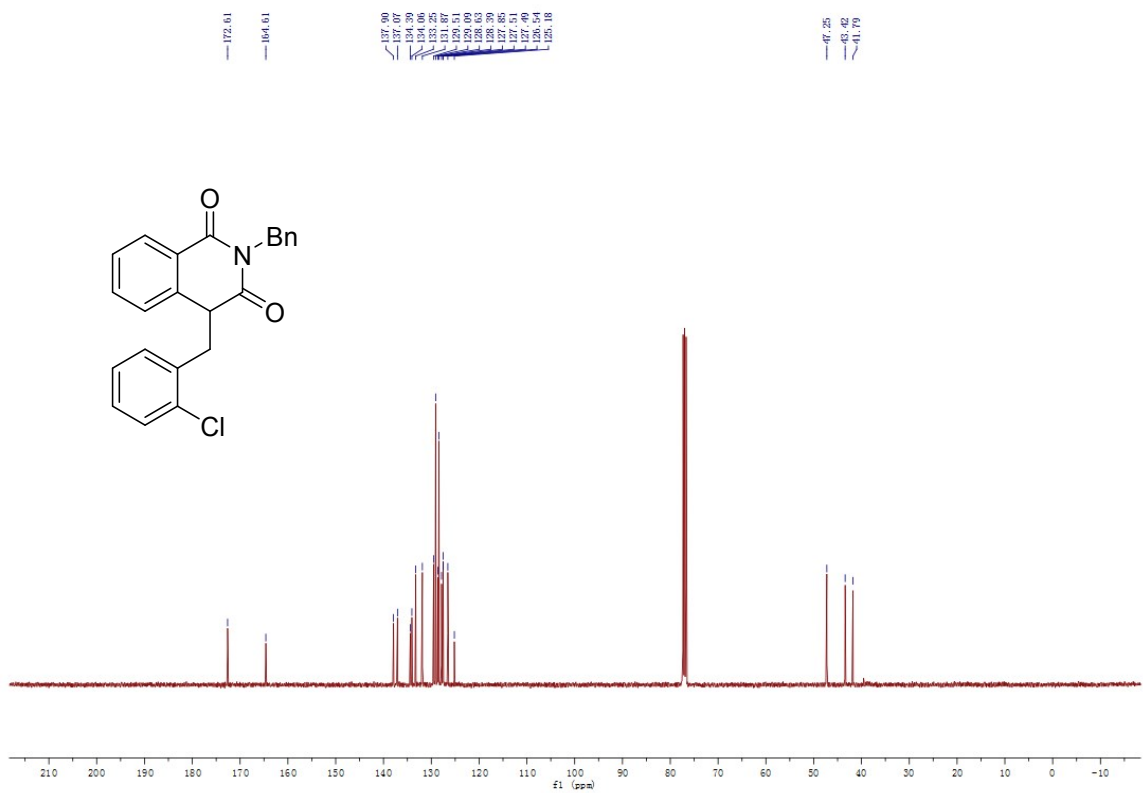

**2-benzyl-4-(3,4,5-trimethylbenzyl)isoquinoline-1,3(2H,4H)-dione (4p):**

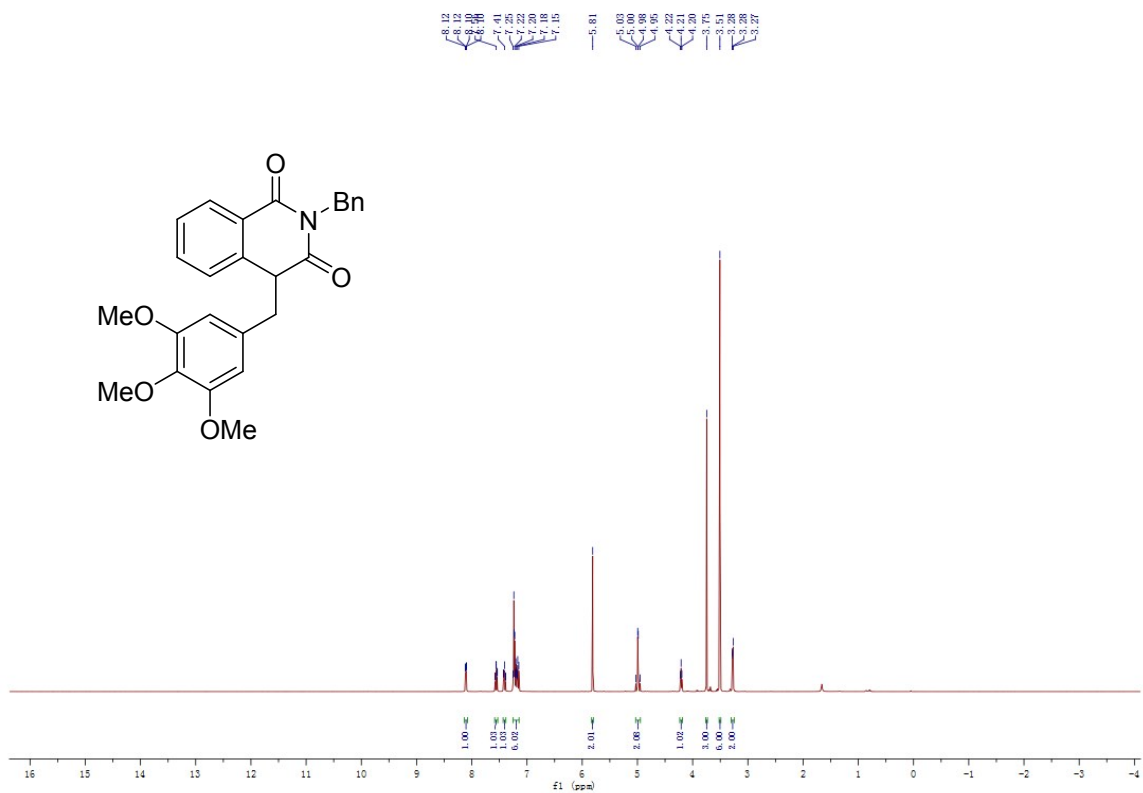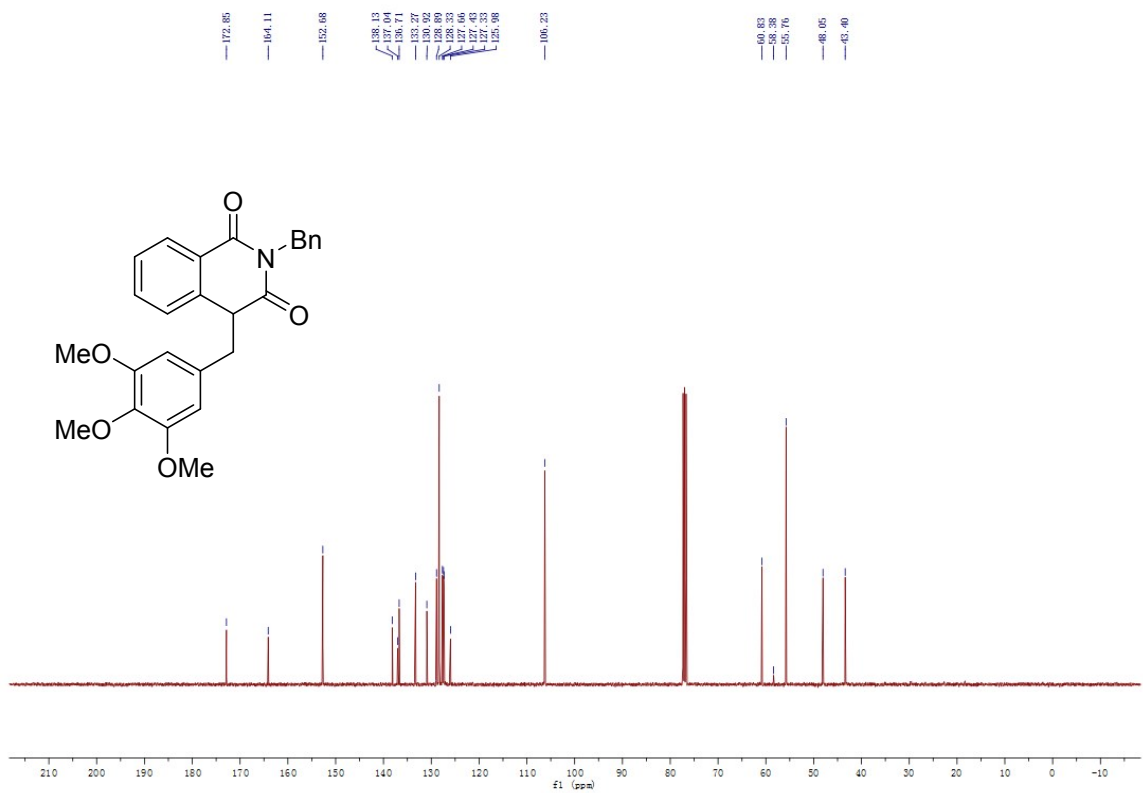

**2-benzyl-4-(naphthalen-2-ylmethyl)isoquinoline-1,3(2H,4H)-dione (4q):**

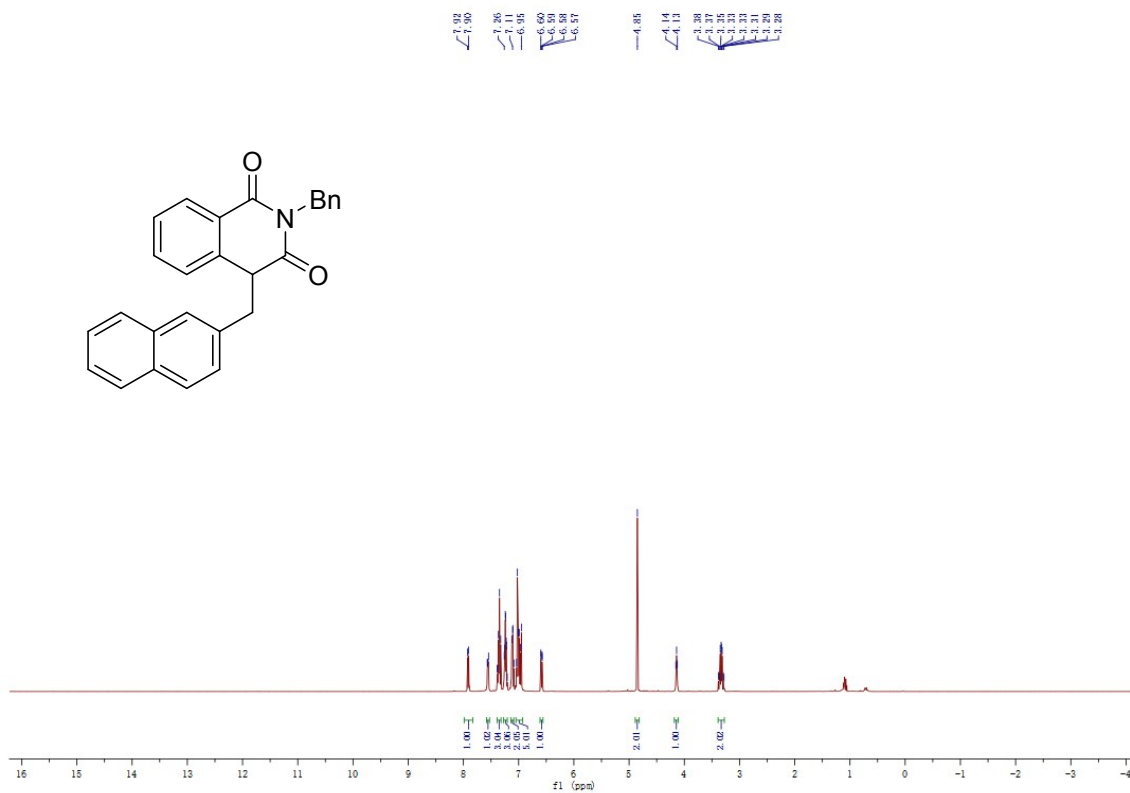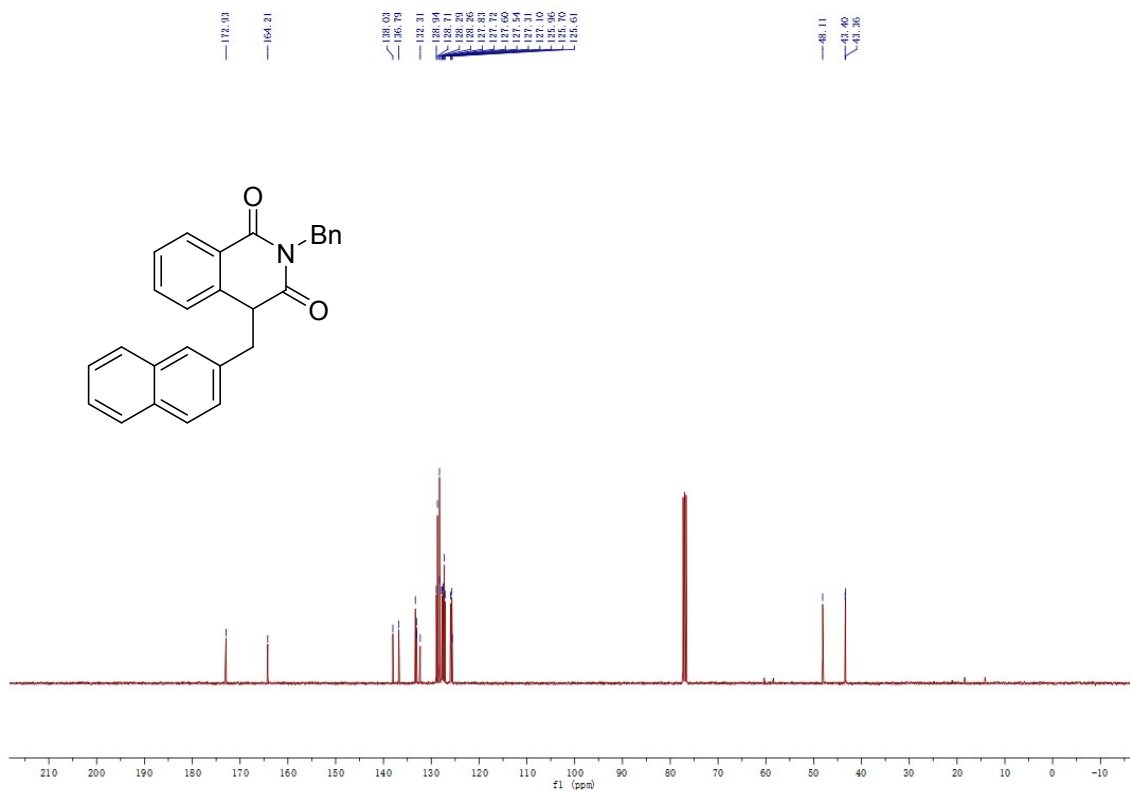

4-((1H-indol-2-yl)methyl)-2-benzylisoquinoline-1,3(2H,4H)-dione (4r):

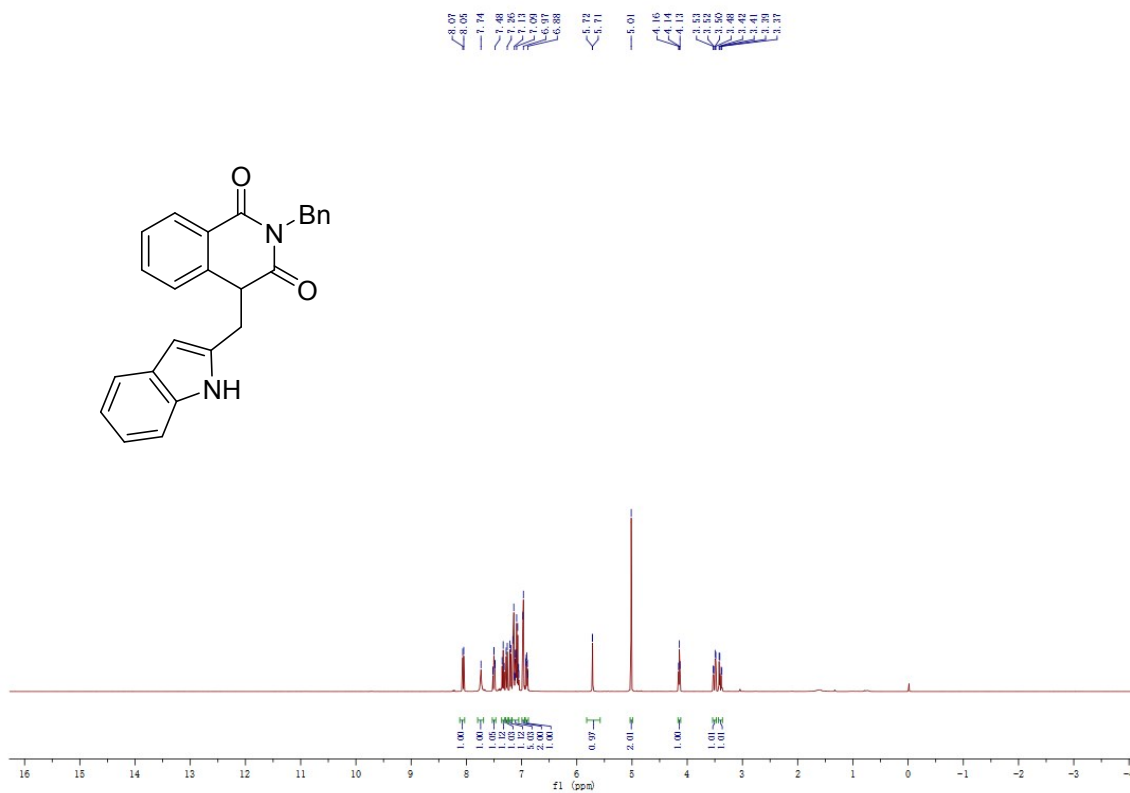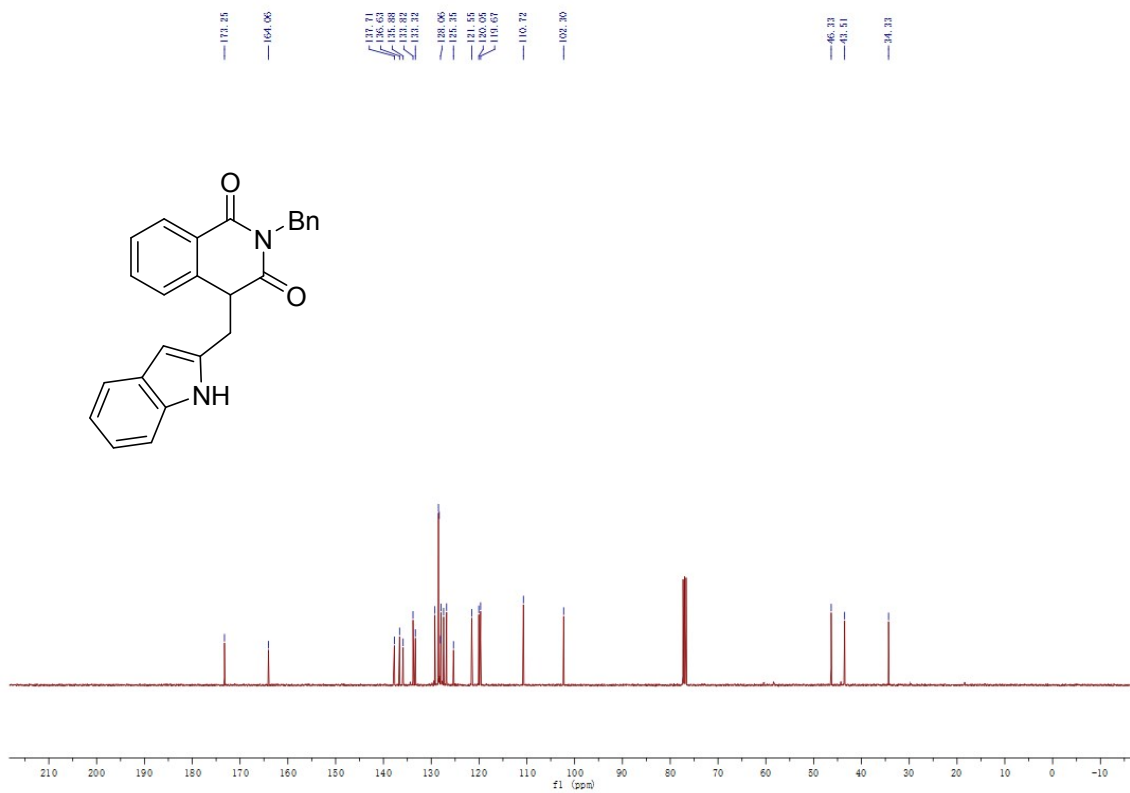



4-((1H-indol-3-yl)methyl)-2-benzylisoquinoline-1,3(2H,4H)-dione (4s):

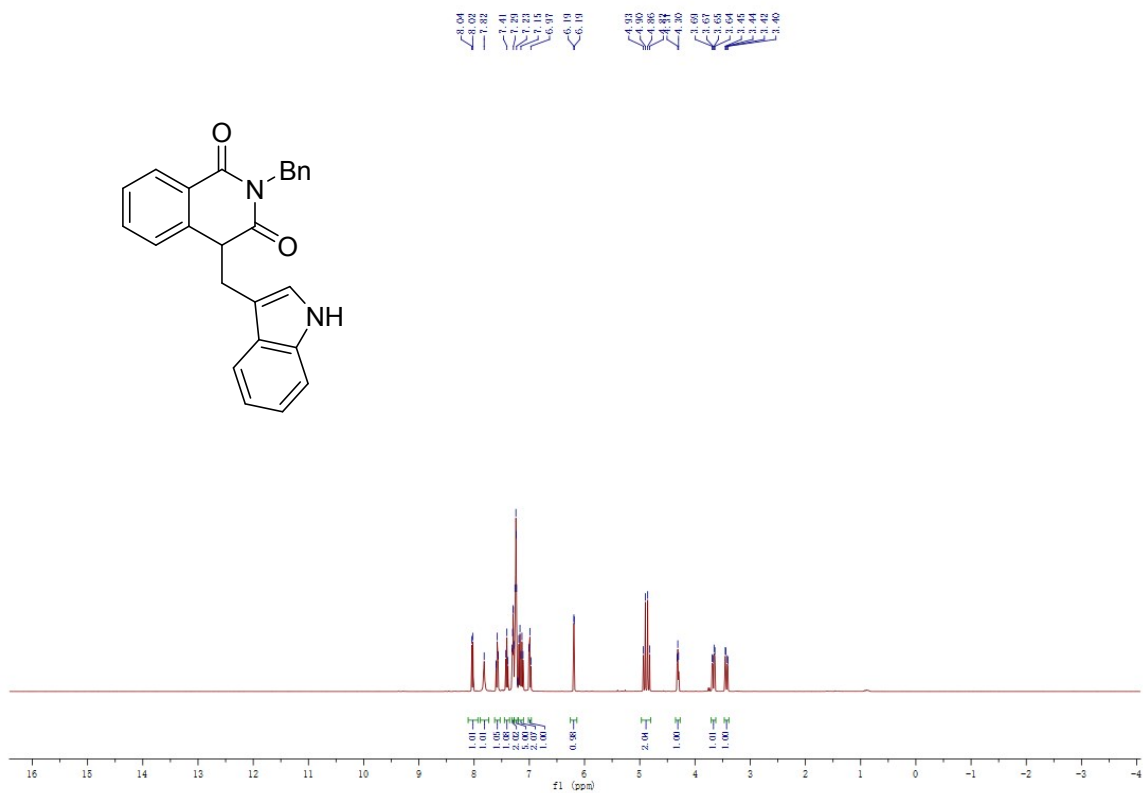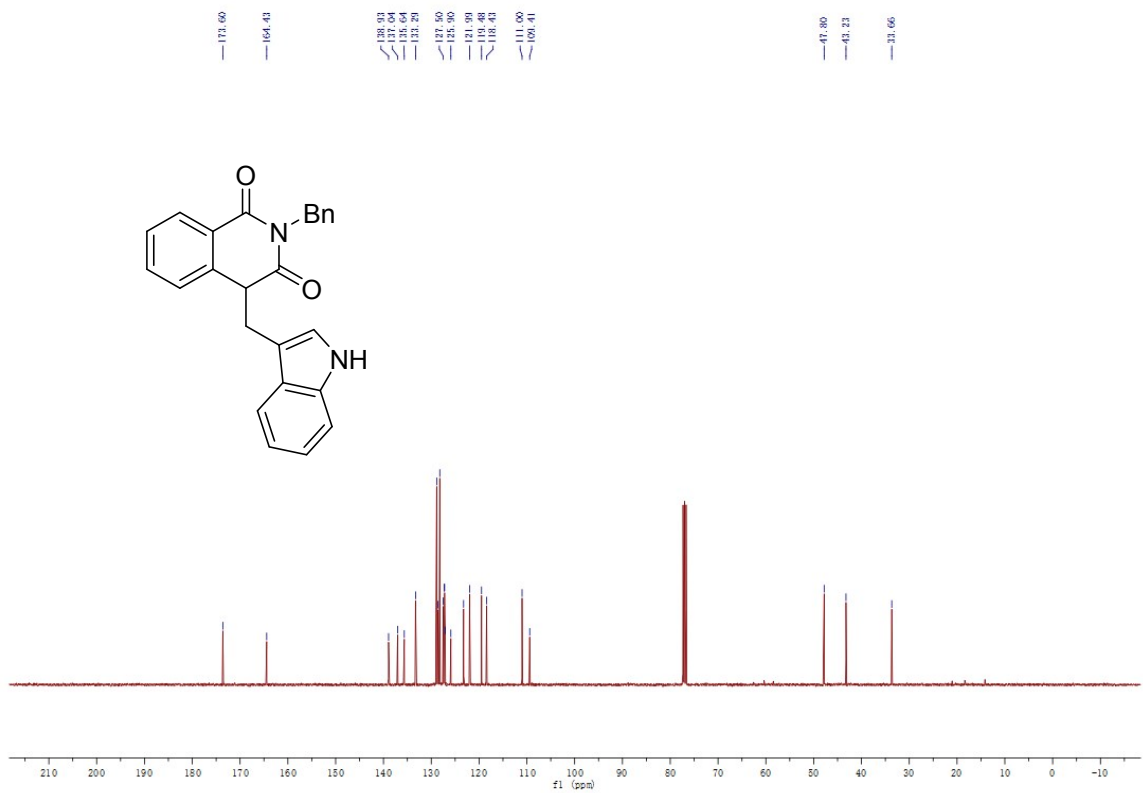

**2-benzyl-4-((2-methyl-1H-indol-3-yl)methyl)isoquinoline-1,3(2H,4H)-dione (4t):**

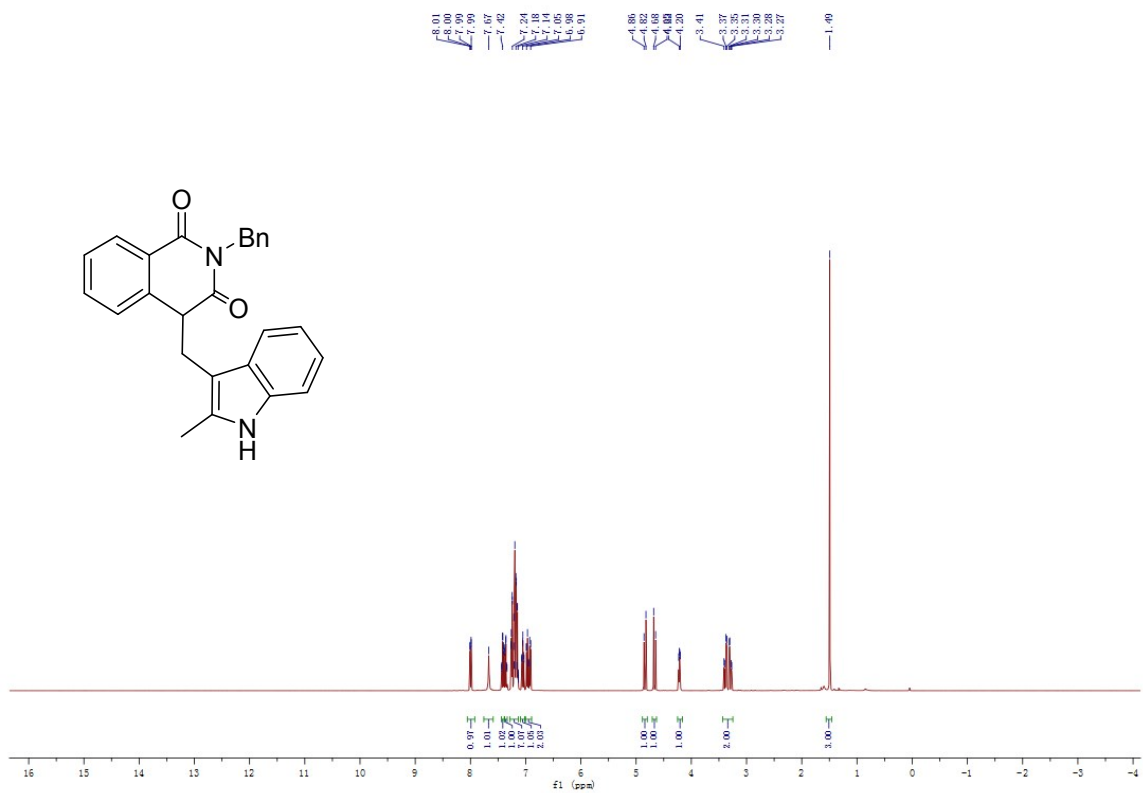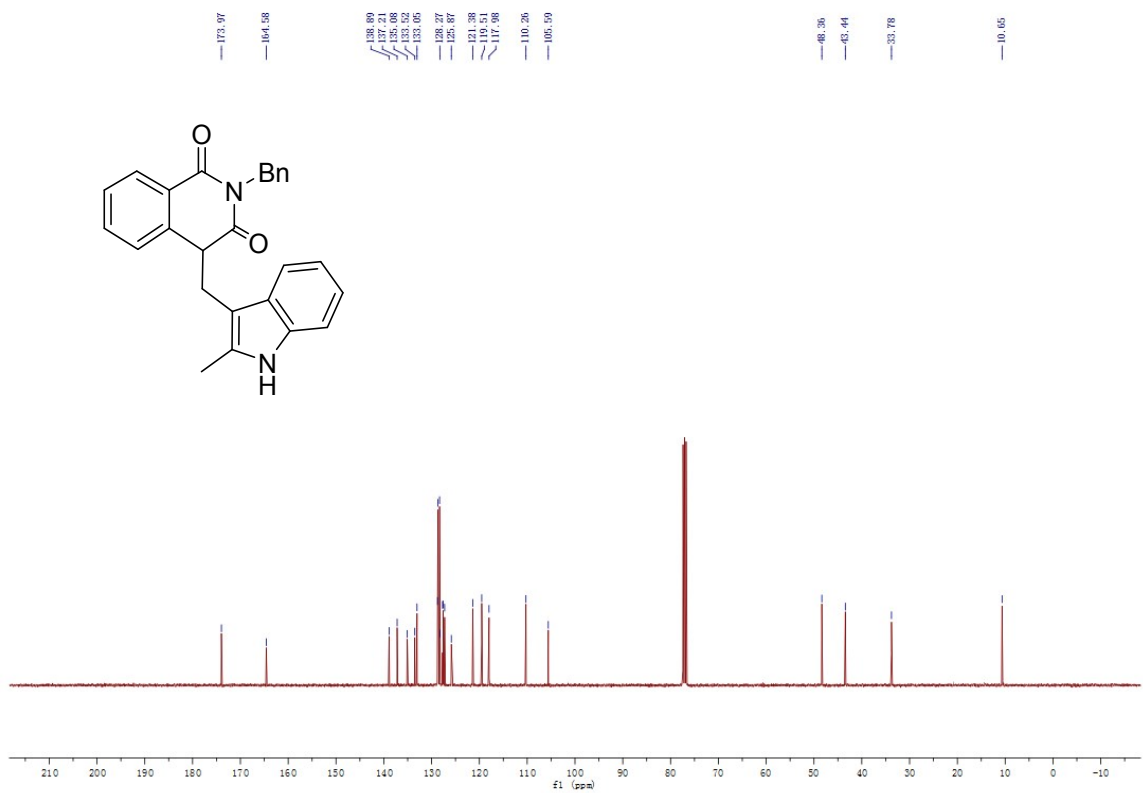

**2-benzyl-4-(furan-2-ylmethyl)isoquinoline-1,3(2H,4H)-dione (4u):**

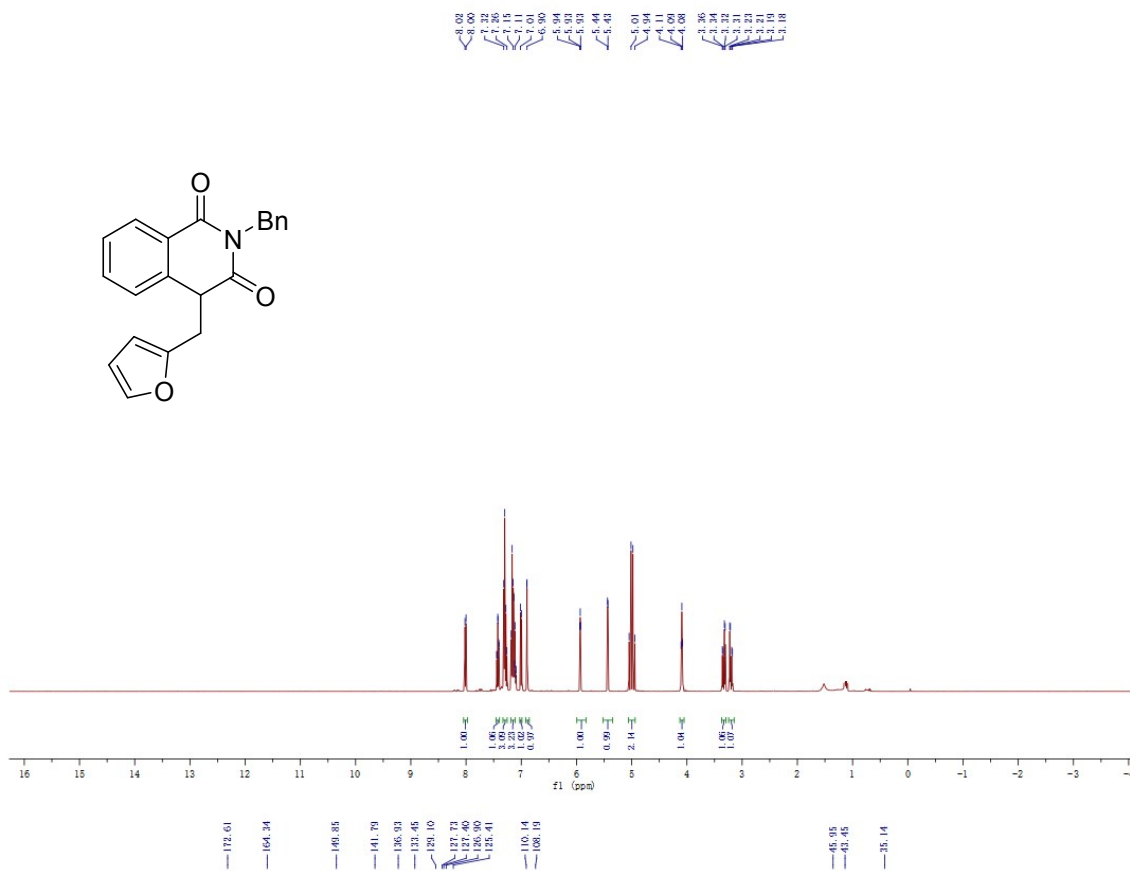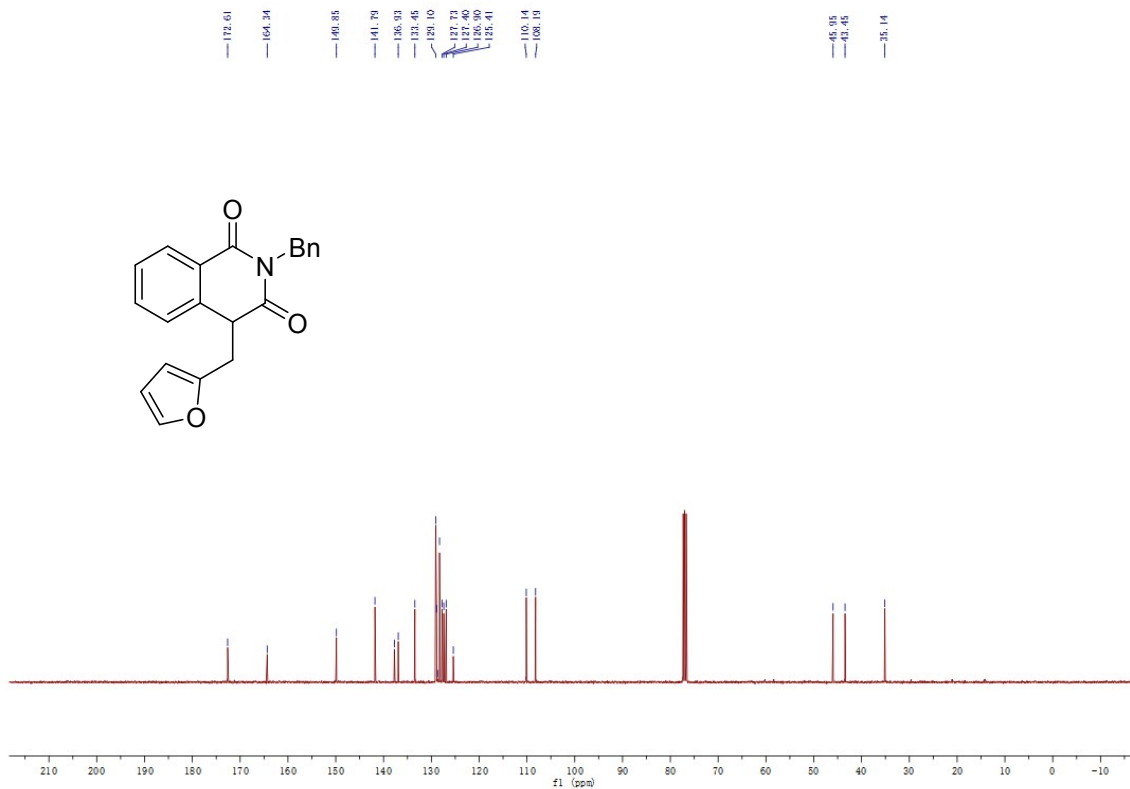

**di-tert-butyl(S)-1-(2-benzyl-4-butyl-1,3-dioxo-1,2,3,4-tetrahydroisoquinolin-4-yl)hydrazine-1,2-dicarboxylate (6a):**

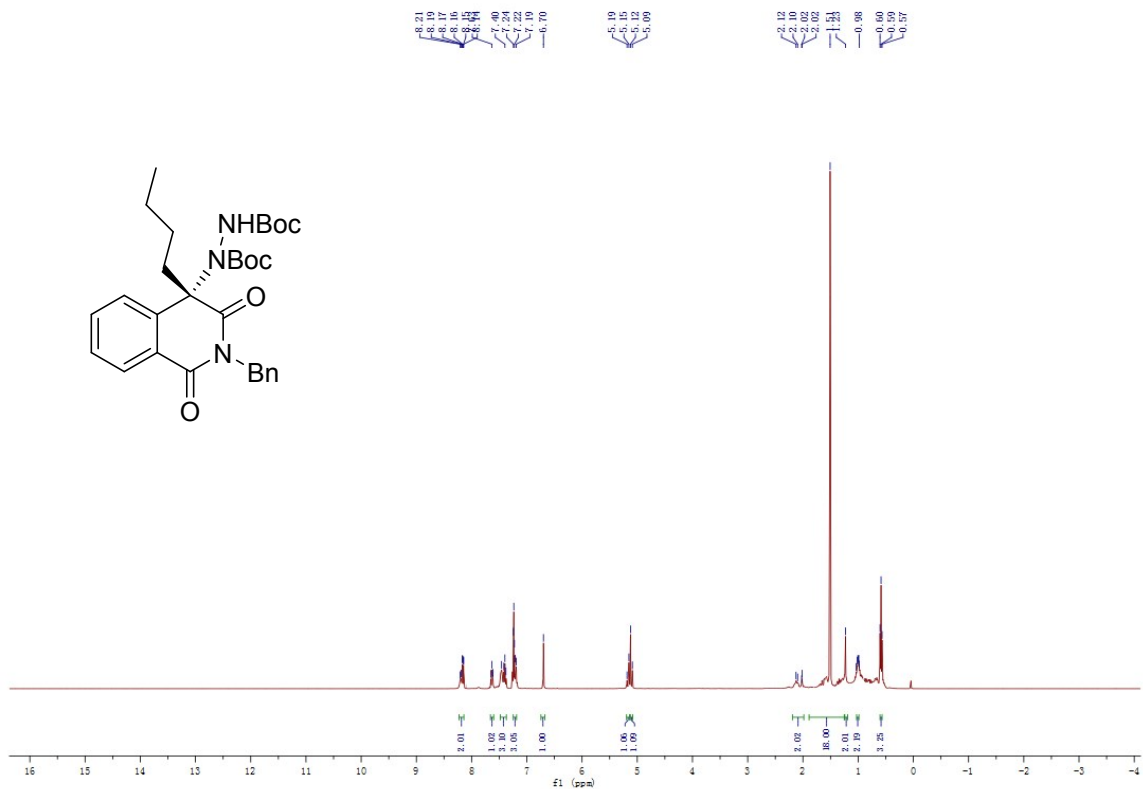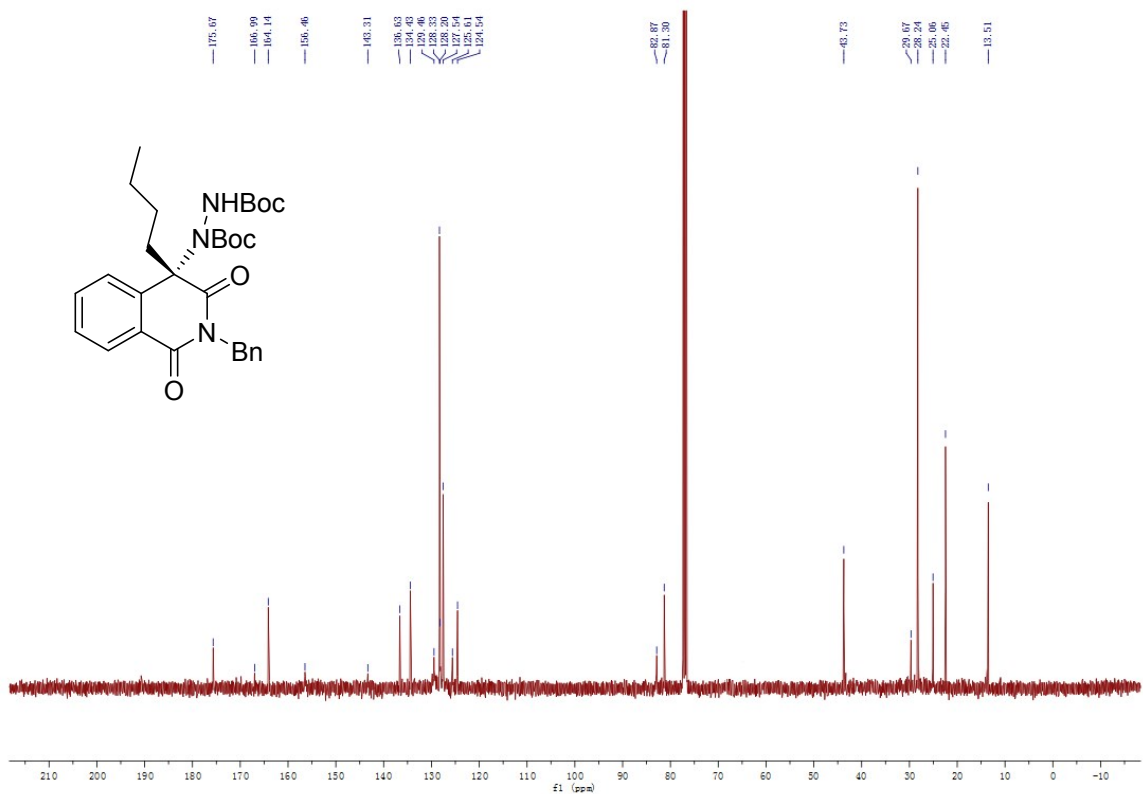

**di-tert-butyl(S)-1-(2-benzyl-4-isopentyl-1,3-dioxo-1,2,3,4-tetrahydroisoquinolin-4-yl)hydrazine-1,2-dicarboxylate (6b):**

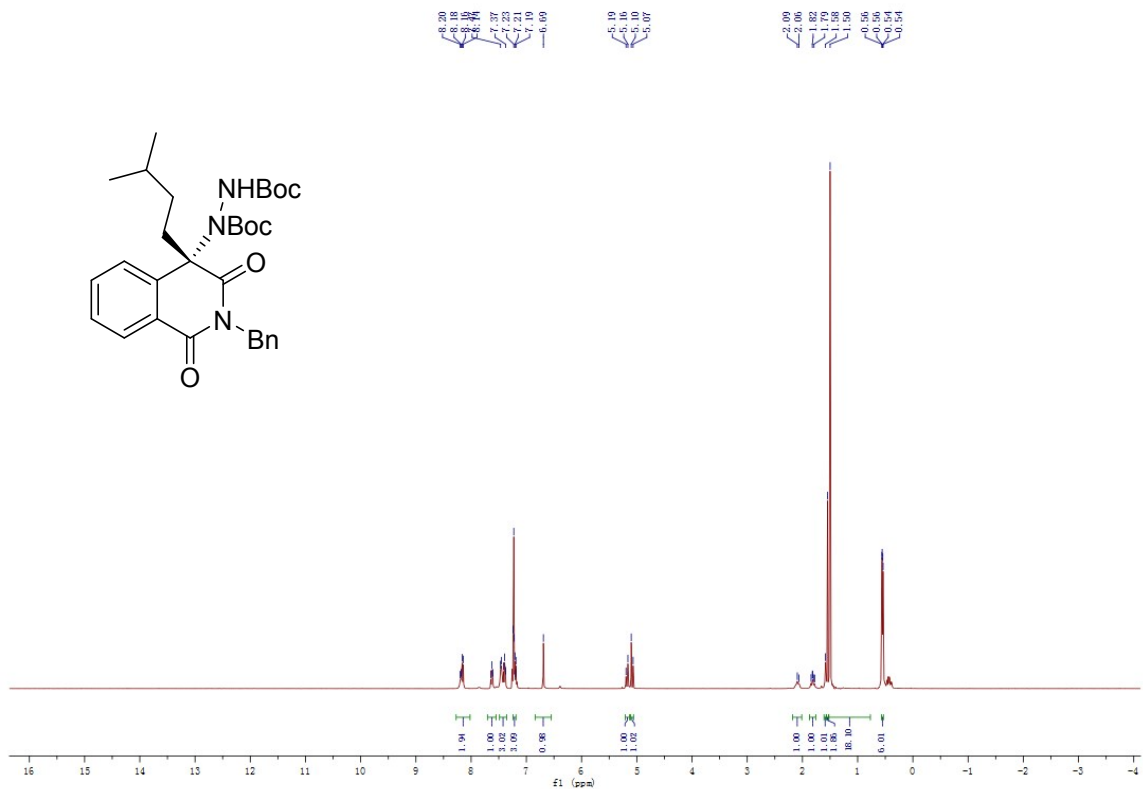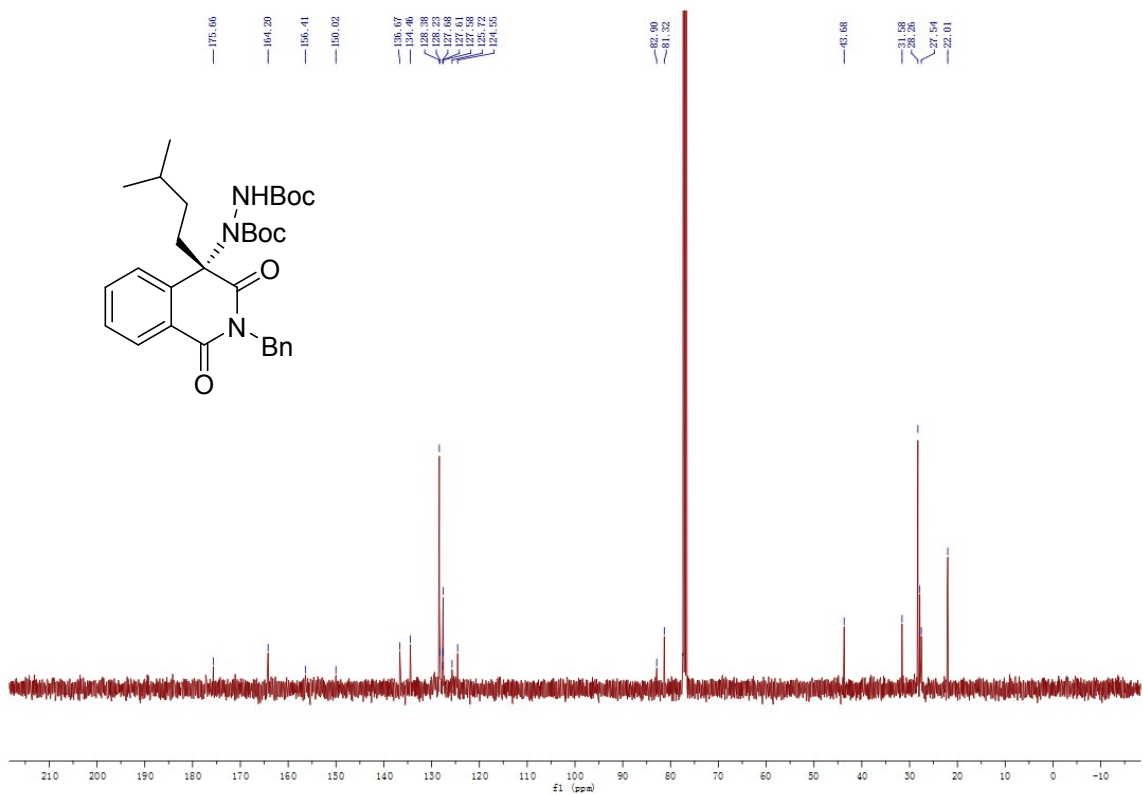

**di-tert-butyl(S)-1-(2-benzyl-4-isobutyl-1,3-dioxo-1,2,3,4-tetrahydroisoquinolin-4-yl)hydrazine-1,2-dicarboxylate (6c):**

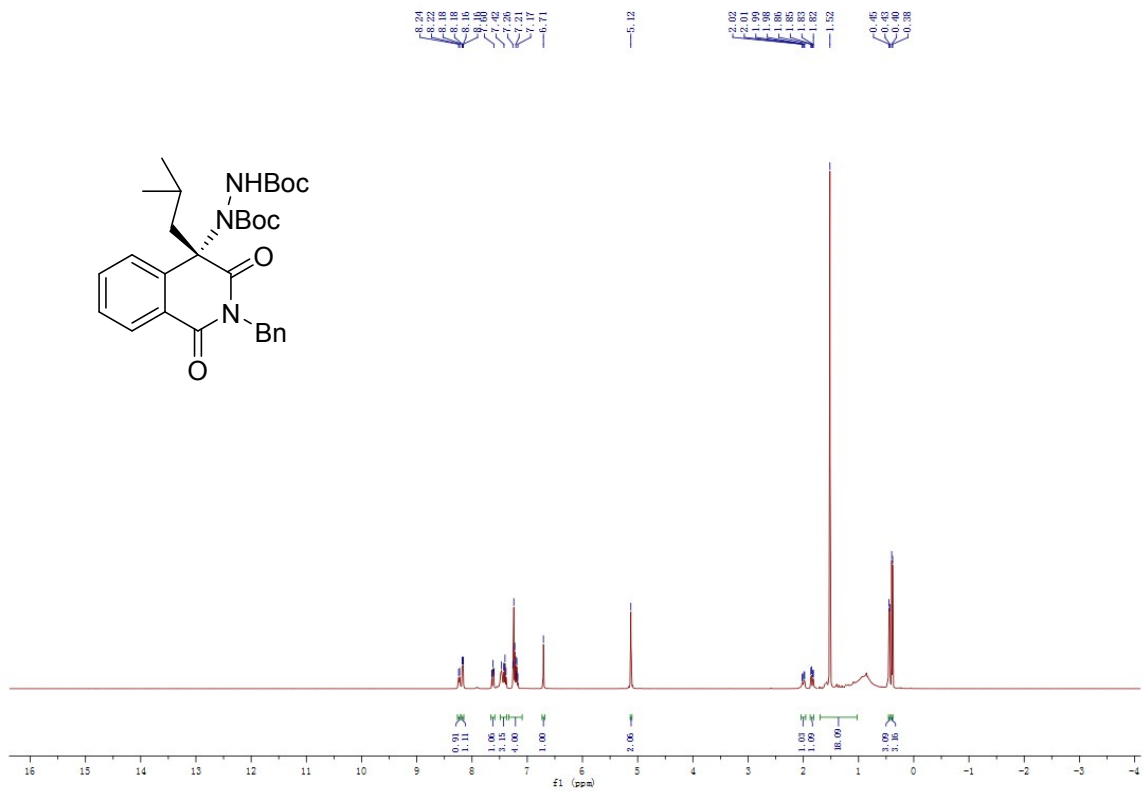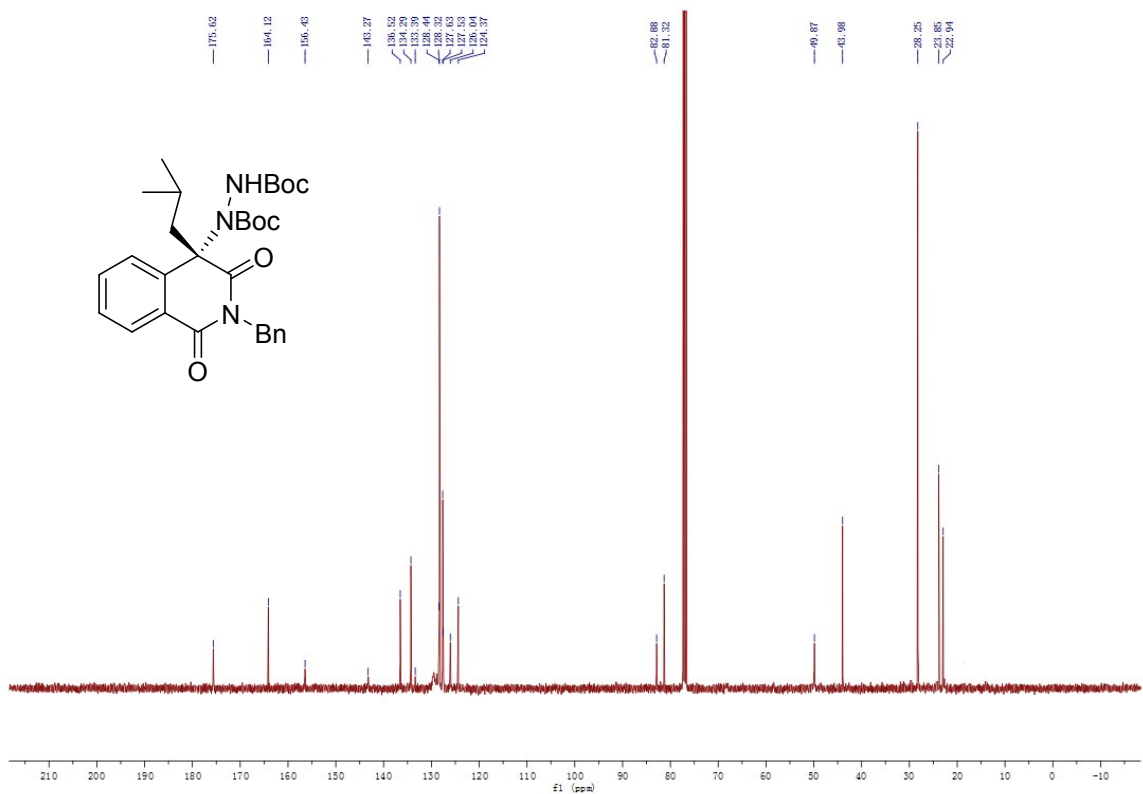

**di-tert-butyl(S)-1-(2-benzyl-1,3-dioxo-4-(3-phenylpropyl)-1,2,3,4-tetrahydroisoquinolin-4-yl)hydrazine-1,2-dicarboxylate(6d):**

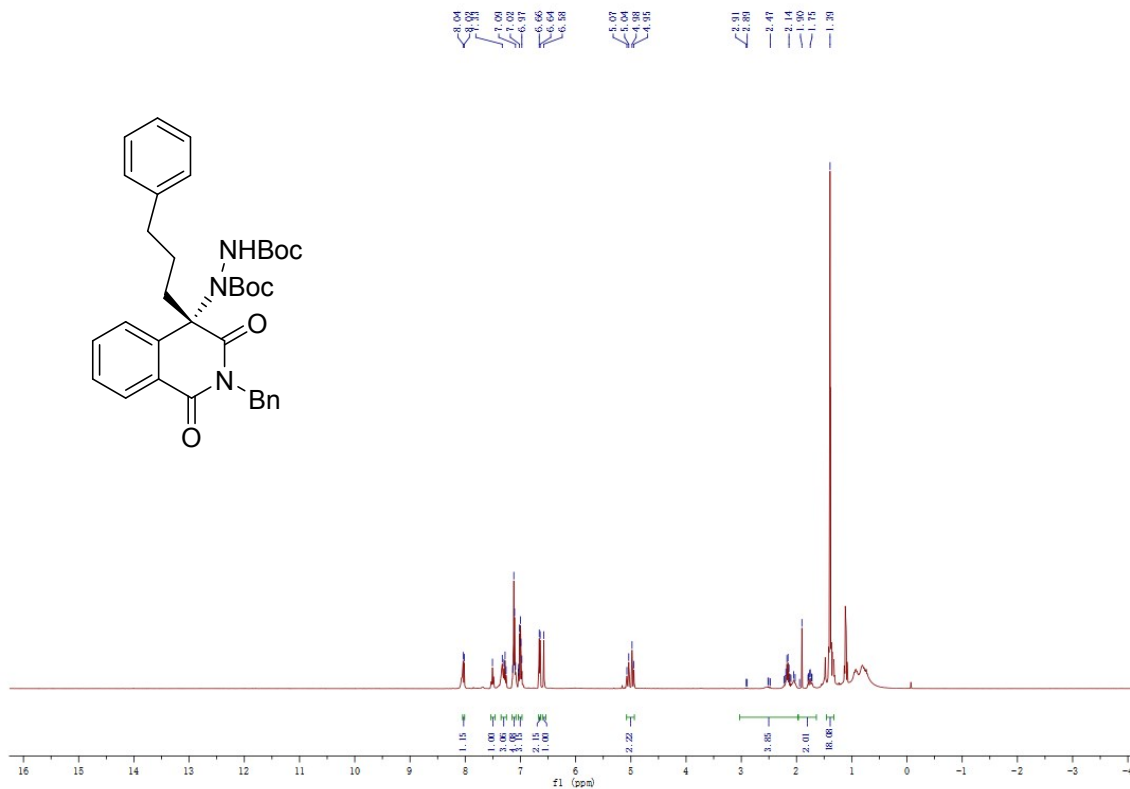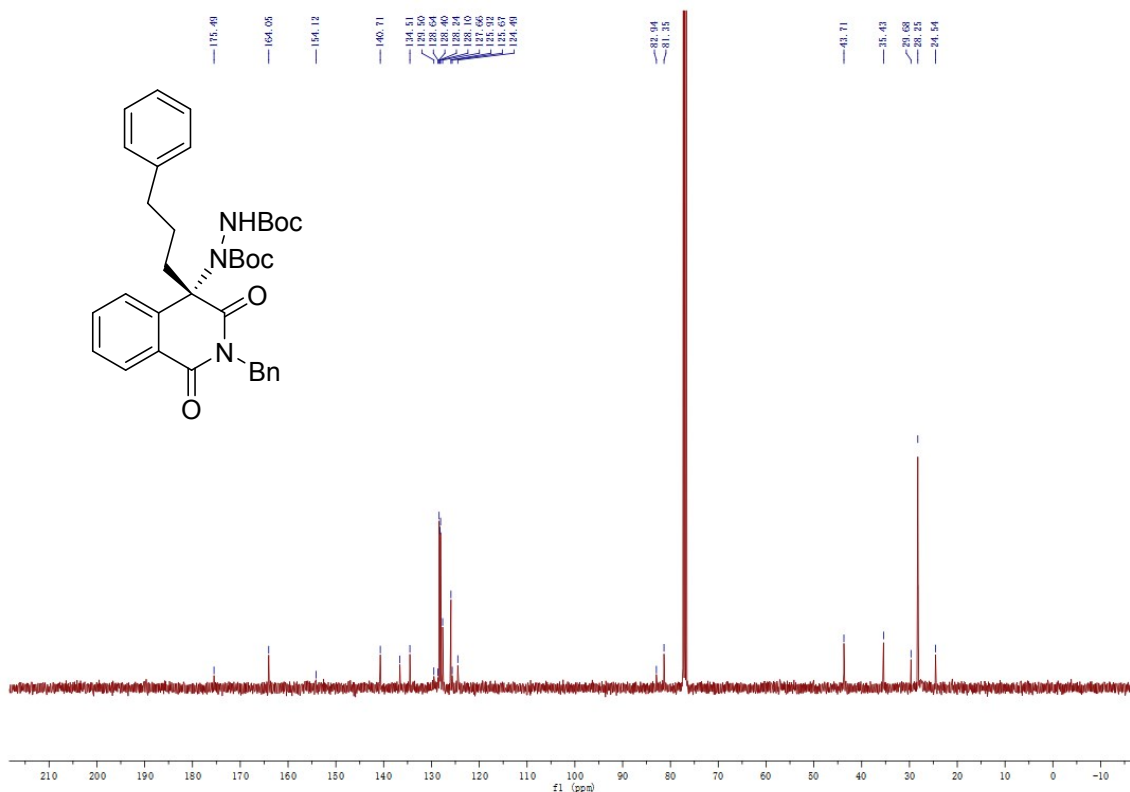

**(di-tert-butyl(S)-1-(2,4-dibenzyl-1,3-dioxo-1,2,3,4-tetrahydroisoquinolin-4-yl)hydrazine-1,2-dicarboxylate (6e):**

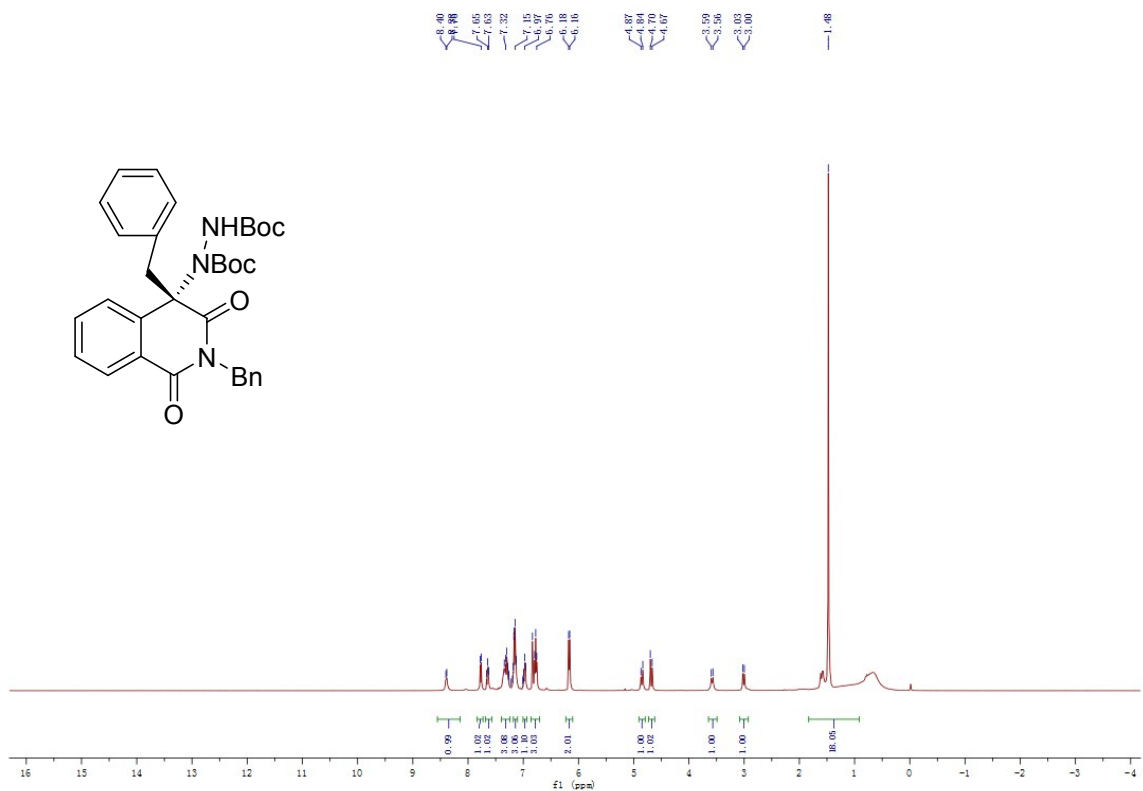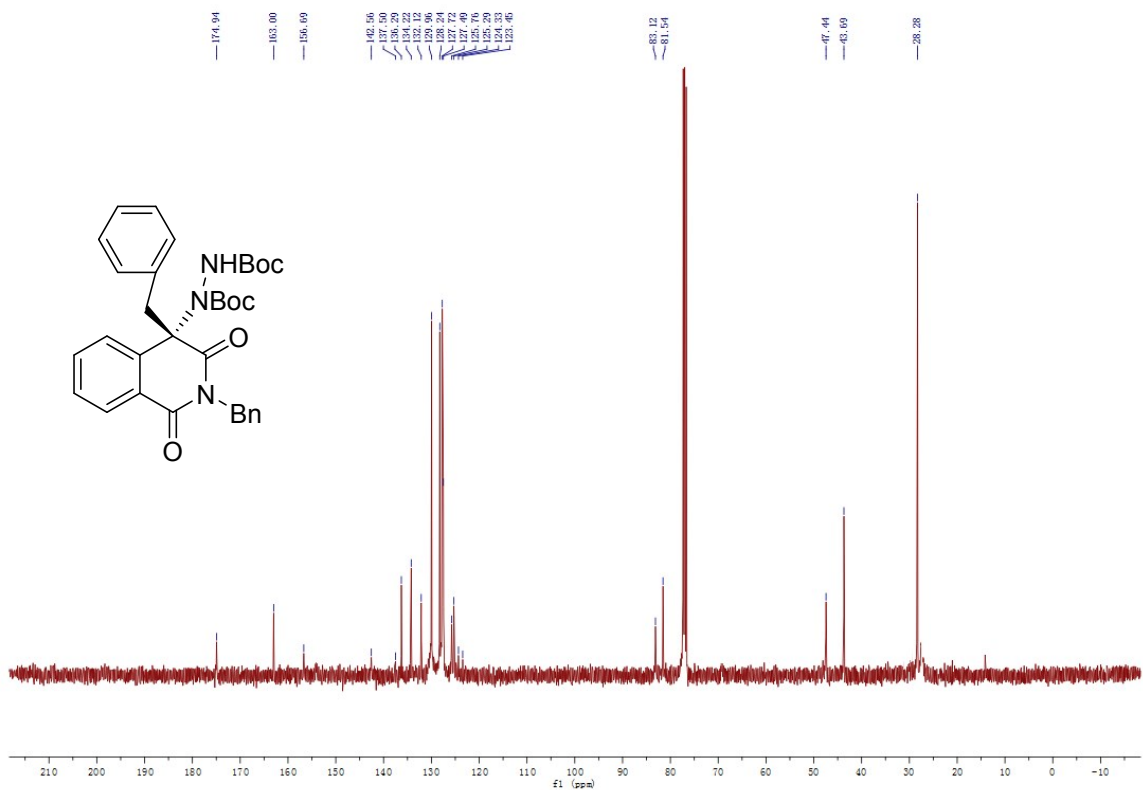



**di-tert-butyl(S)-1-(2-benzyl-4-(4-methylbenzyl)-1,3-dioxo-1,2,3,4-tetrahydroisoquinolin-4-yl)hydrazine-1,2-dicarboxylate (6f):**

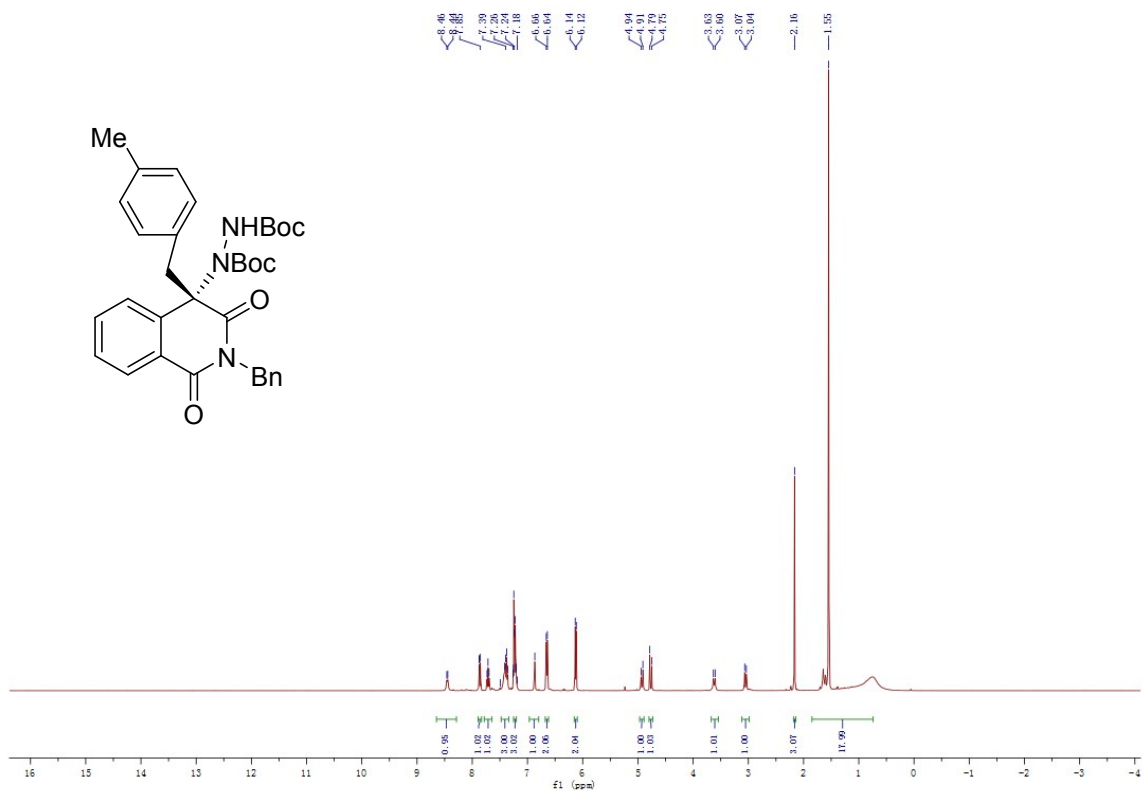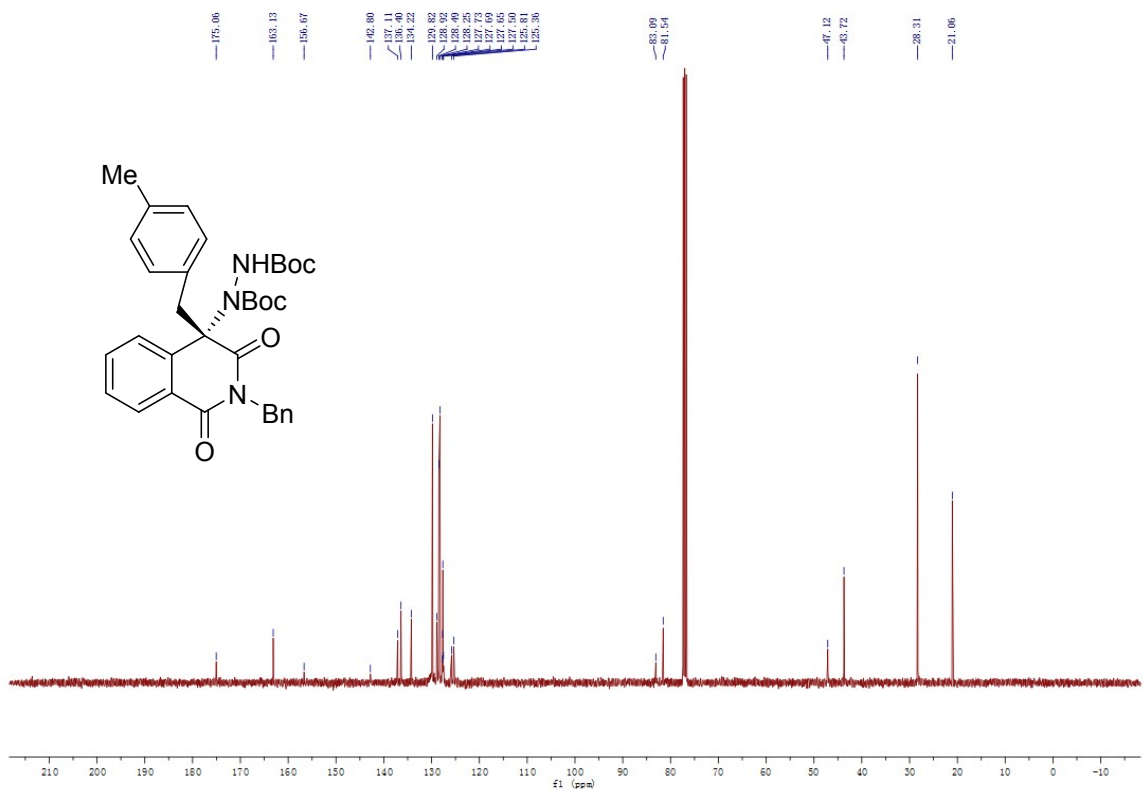

**di-tert-butyl(S)-1-(2-benzyl-4-(4-methoxybenzyl)-1,3-dioxo-1,2,3,4-tetrahydroisoquinolin-4-yl)hydrazine-1,2-dicarboxylate (6g):**

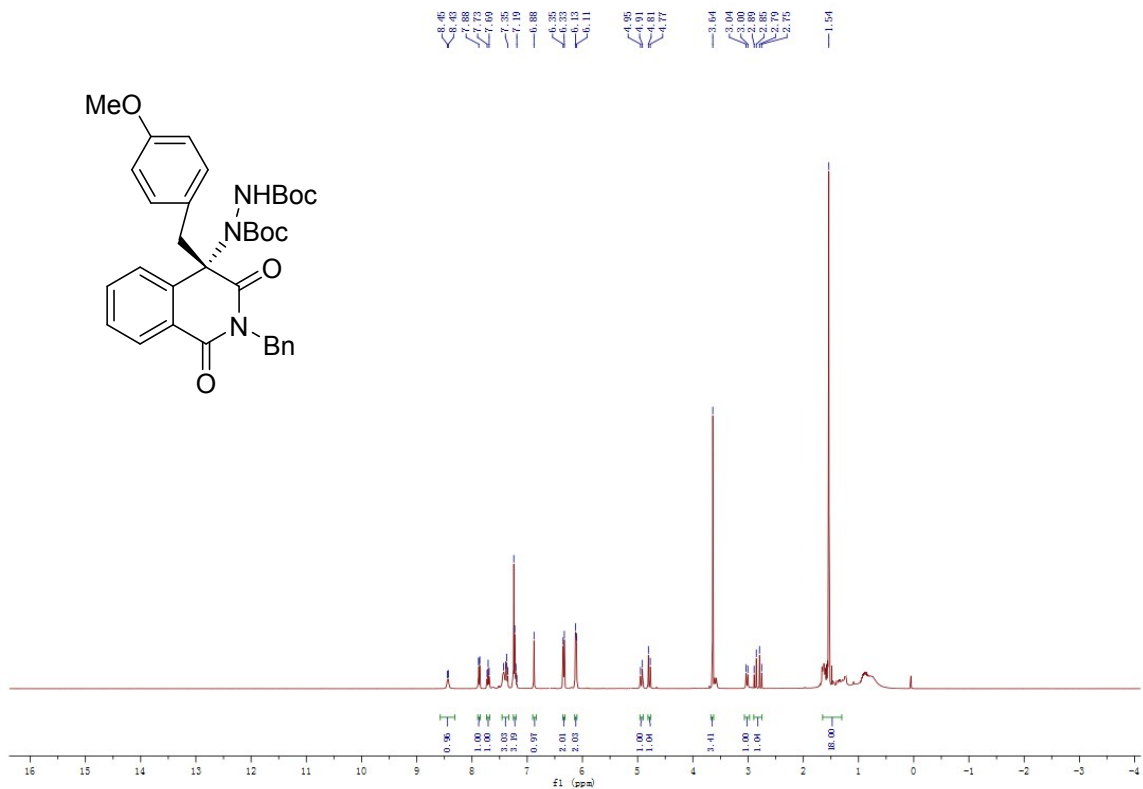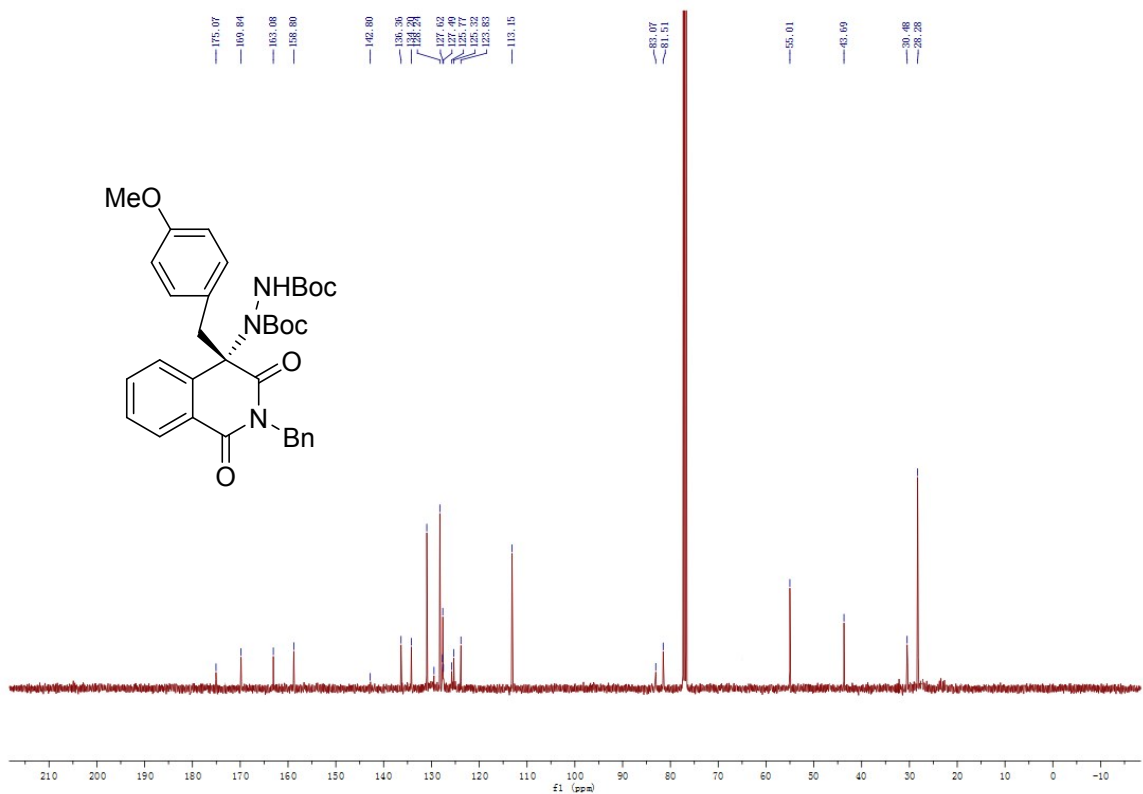

**di-tert-butyl(S)-1-(2-benzyl-4-(4-fluorobenzyl)-1,3-dioxo-1,2,3,4-tetrahydroisoquinolin-4-yl)hydrazine-1,2-dicarboxylate (6h):**

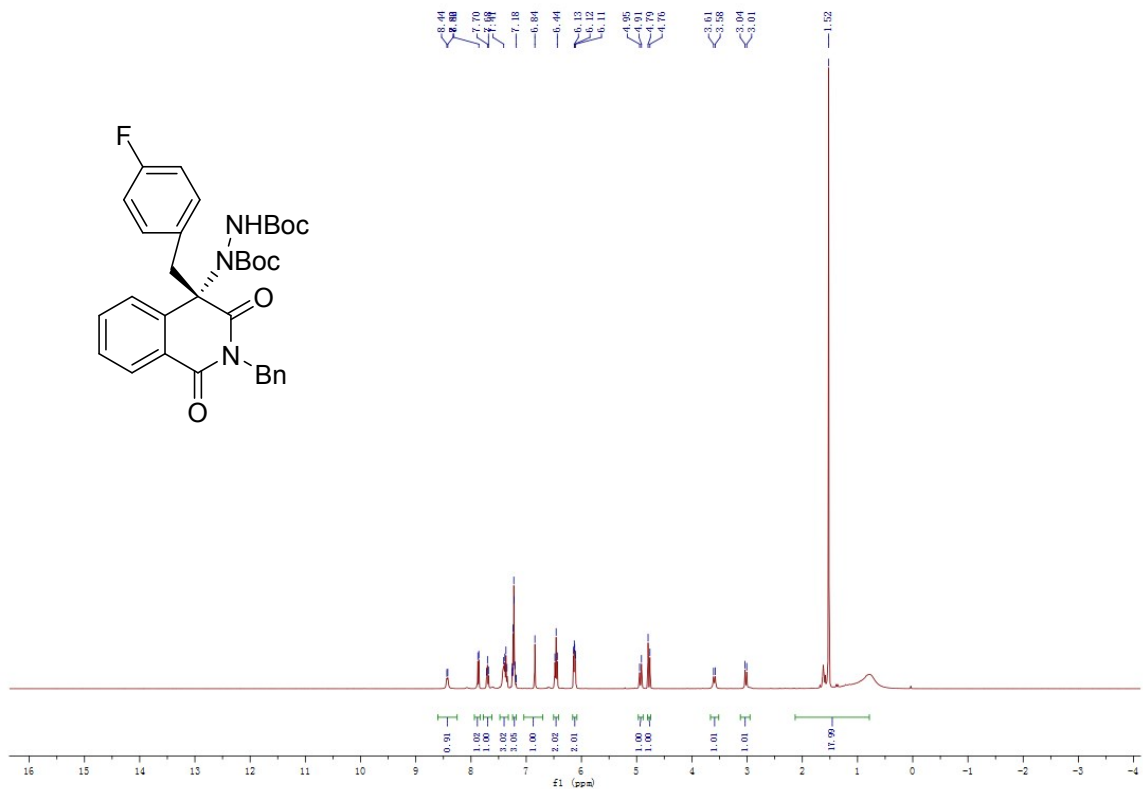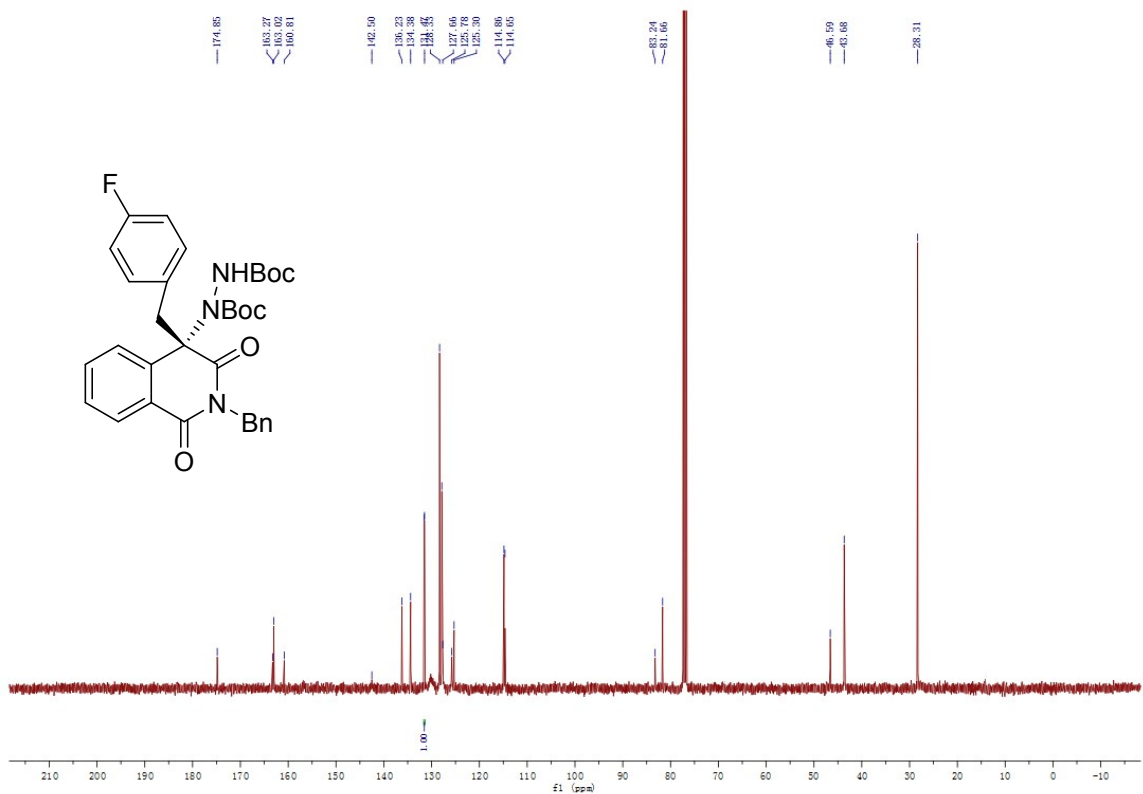

**di-tert-butyl(S)-1-(2-benzyl-4-(4-chlorobenzyl)-1,3-dioxo-1,2,3,4-tetrahydroisoquinolin-4-yl)hydrazine-1,2-dicarboxylate(6i):**

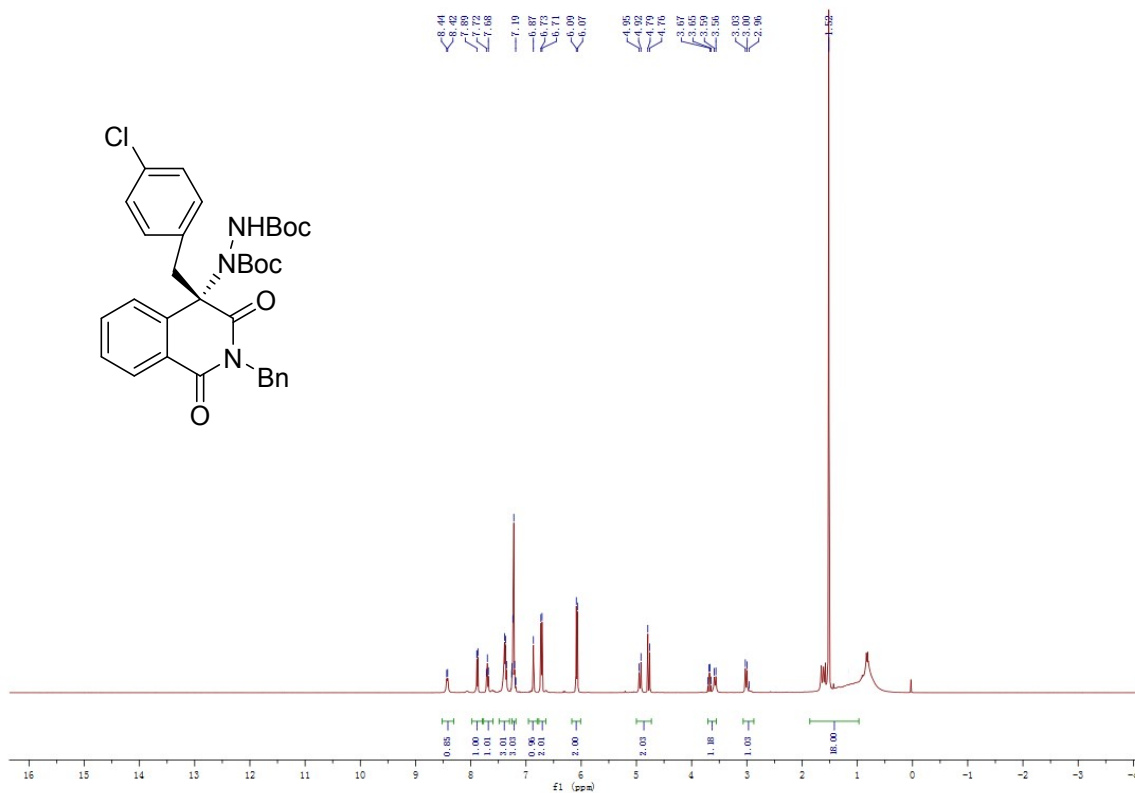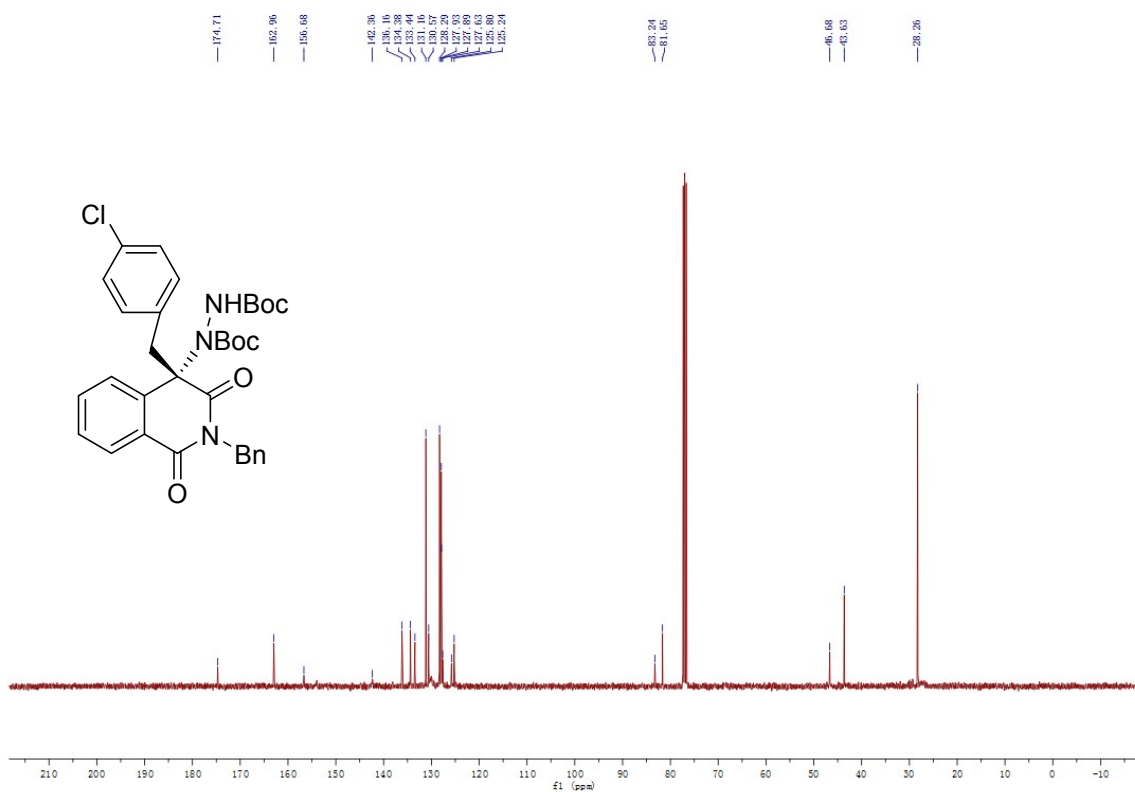

**di-tert-butyl(S)-1-(2-benzyl-4-(4-bromobenzyl)-1,3-dioxo-1,2,3,4-tetrahydroisoquinolin-4-yl)hydrazine-1,2-dicarboxylate (6j):**

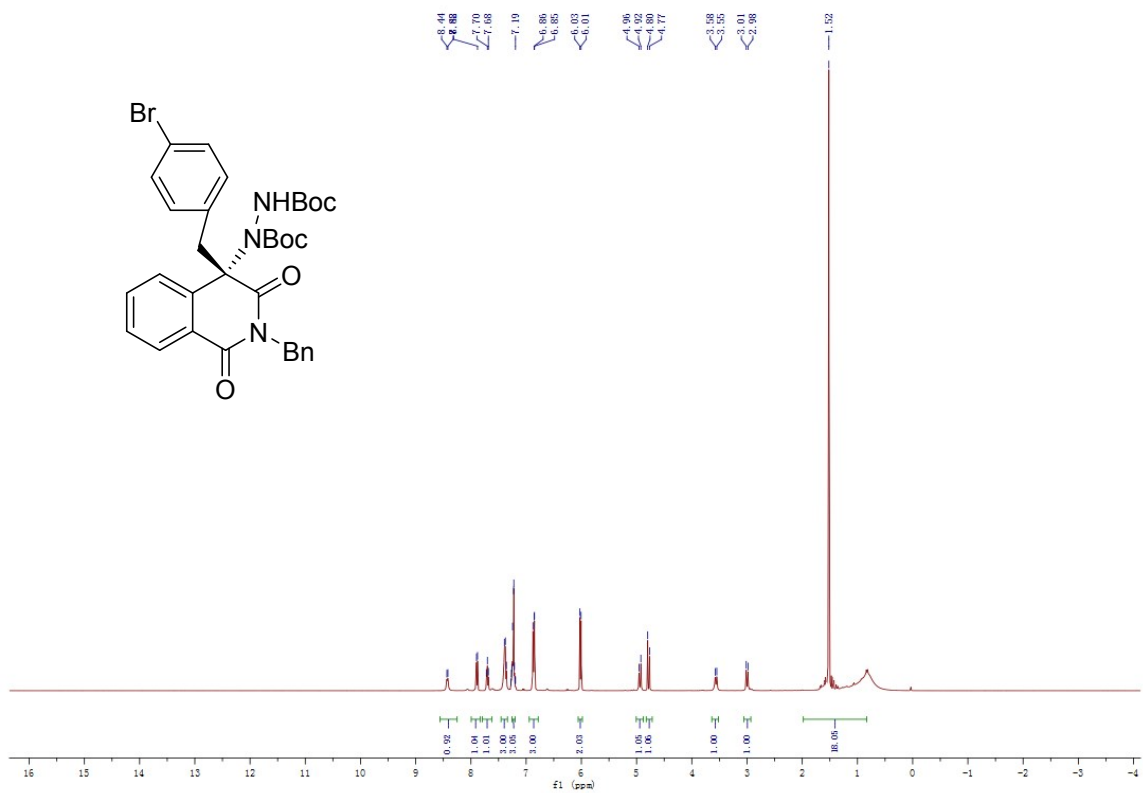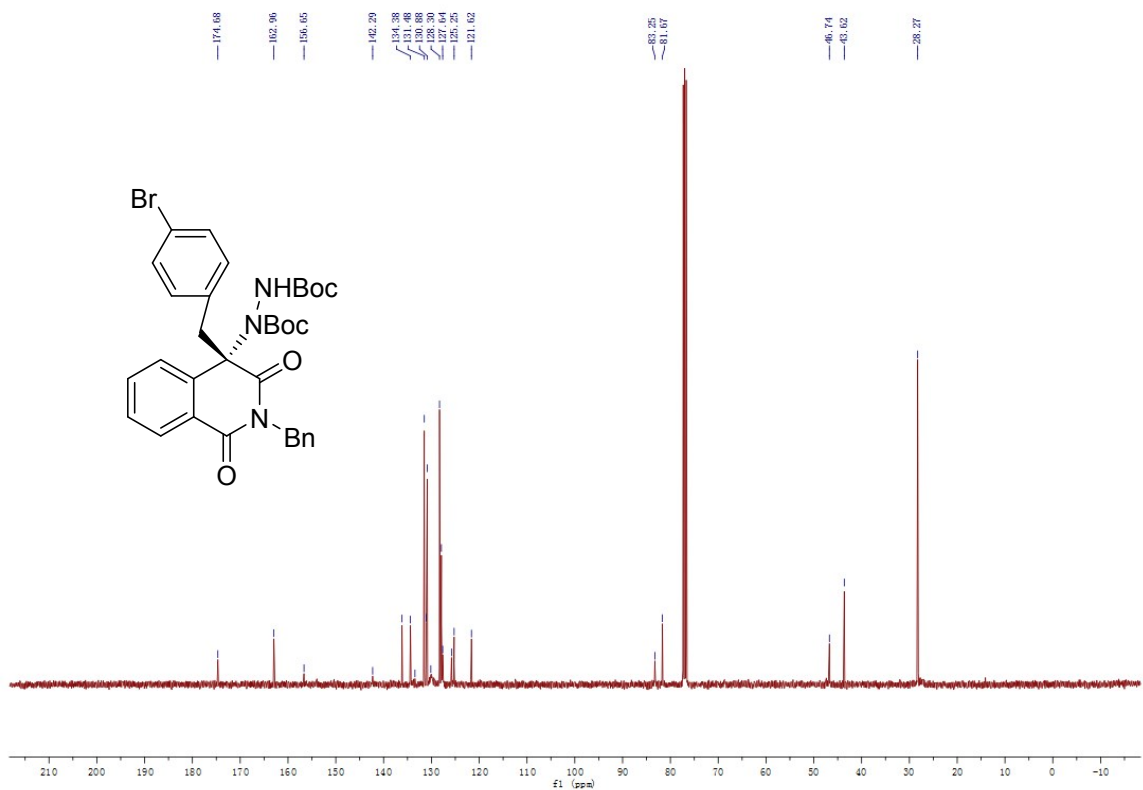

**di-tert-butyl(S)-1-(2-benzyl-4-(3-methylbenzyl)-1,3-dioxo-1,2,3,4-tetrahydroisoquinolin-4-yl)hydrazine-1,2-dicarboxylate (6k):**

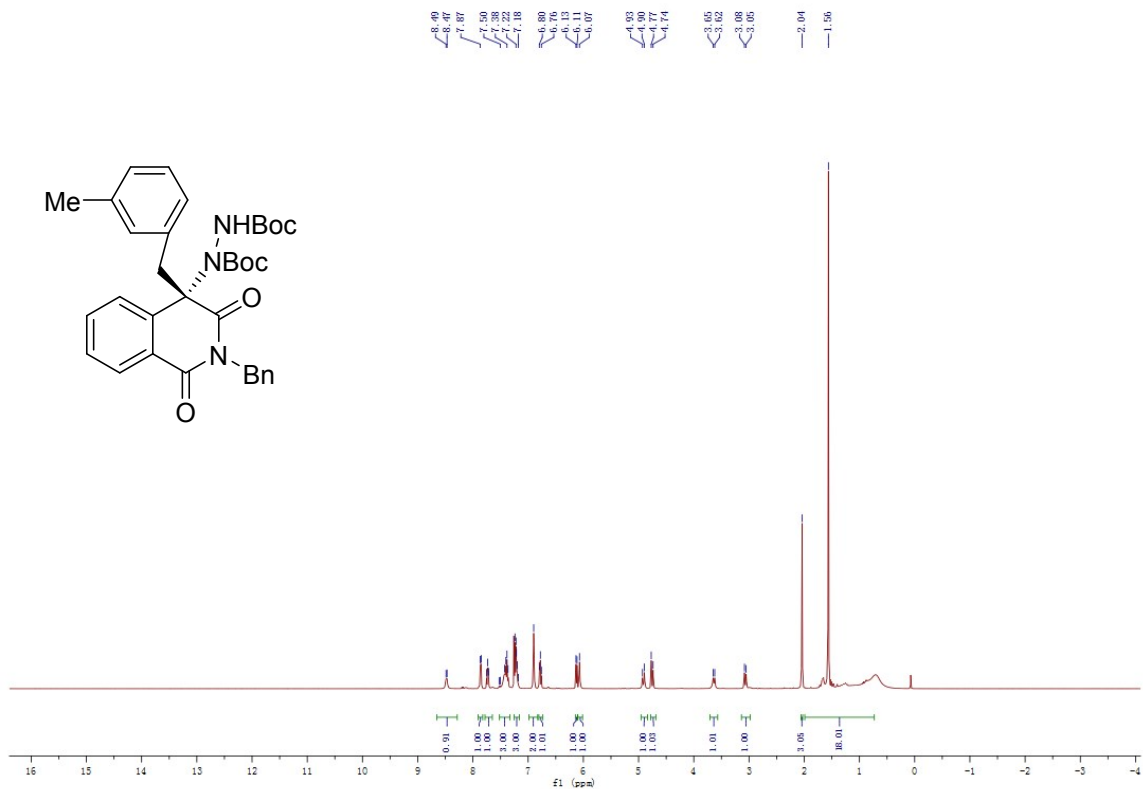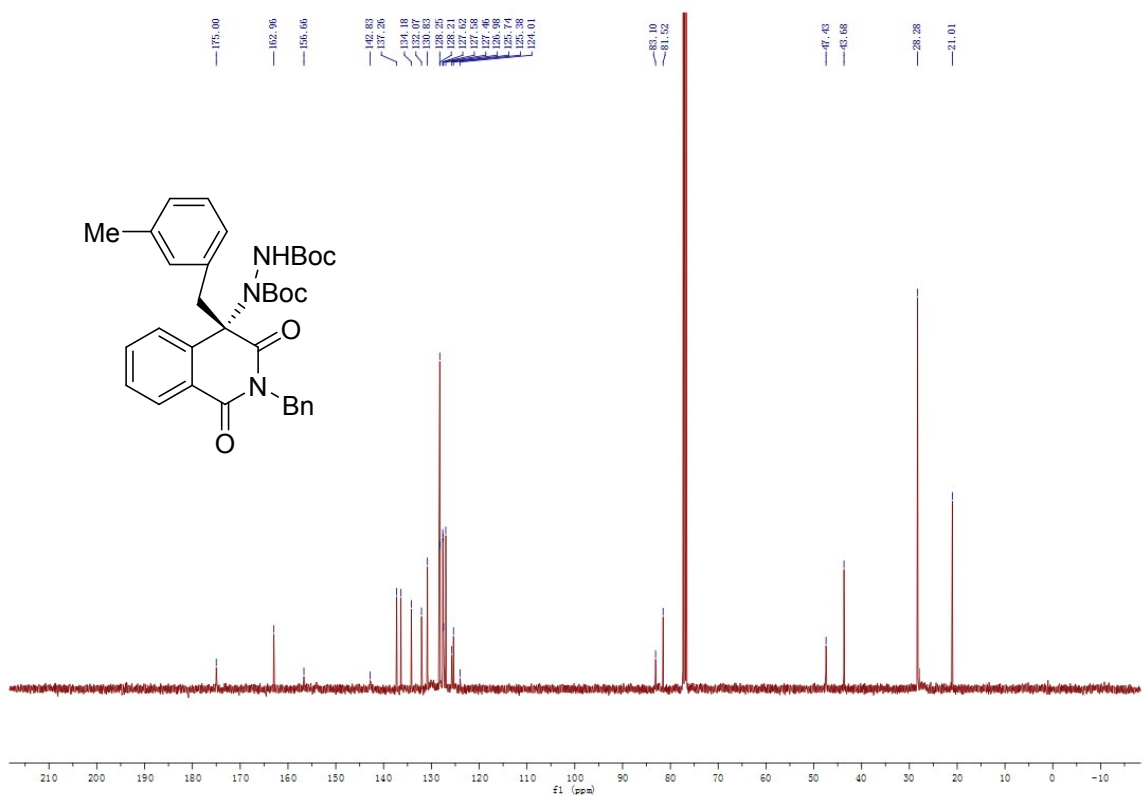

**di-tert-butyl(S)-1-(2-benzyl-4-(3-bromobenzyl)-1,3-dioxo-1,2,3,4-tetrahydroisoquinolin-4-yl)hydrazine-1,2-dicarboxylate (6l):**

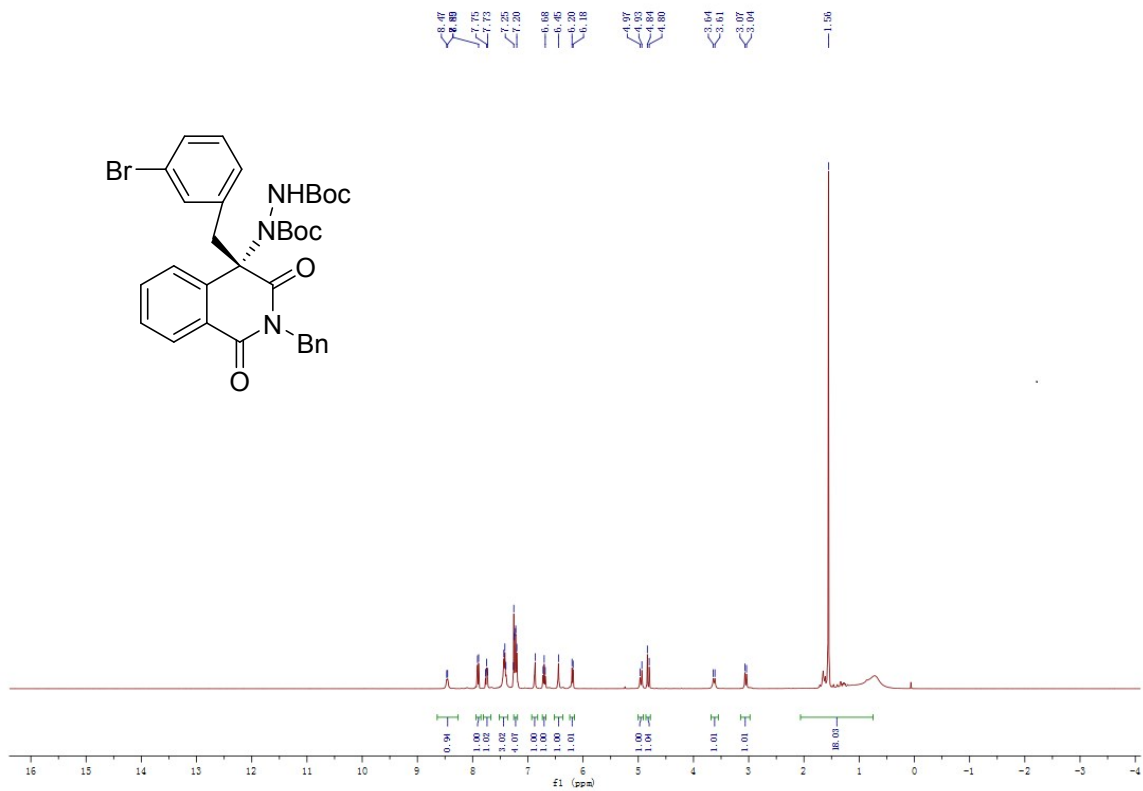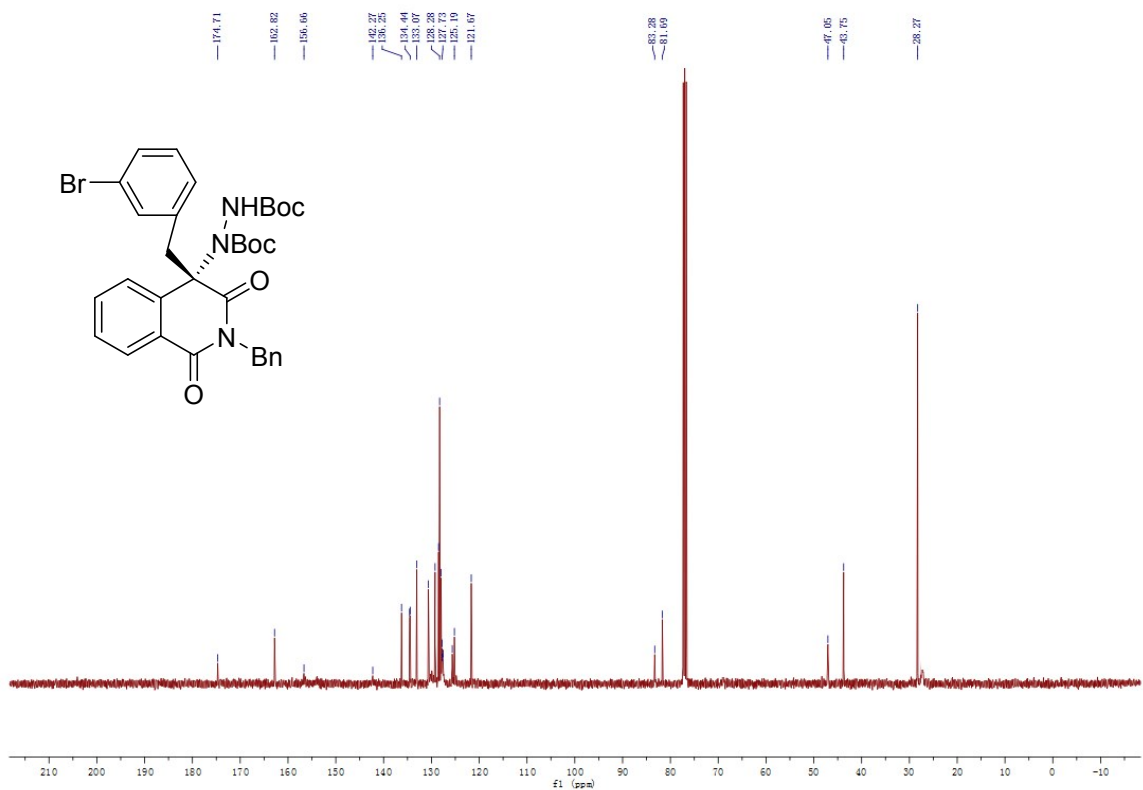

**di-tert-butyl(S)-1-(2-benzyl-4-(2-methoxybenzyl)-1,3-dioxo-1,2,3,4-tetrahydroisoquinolin-4-yl)hydrazine-1,2-dicarboxylate (6m):**

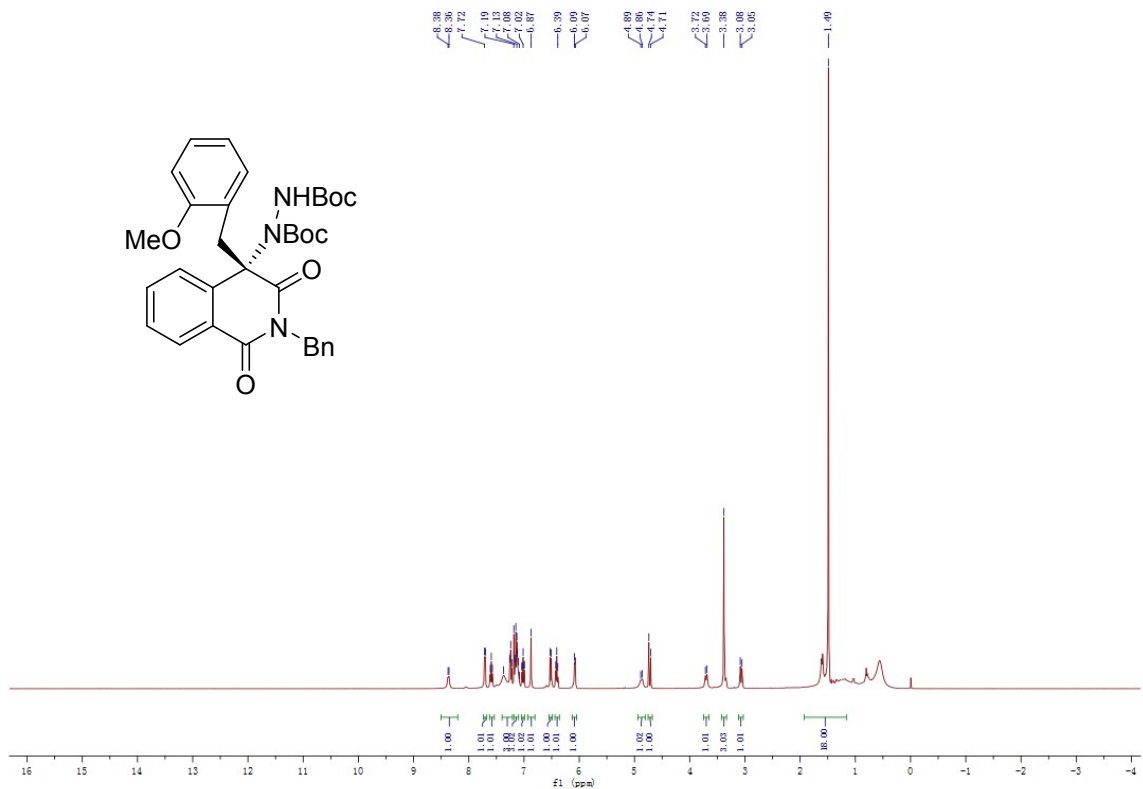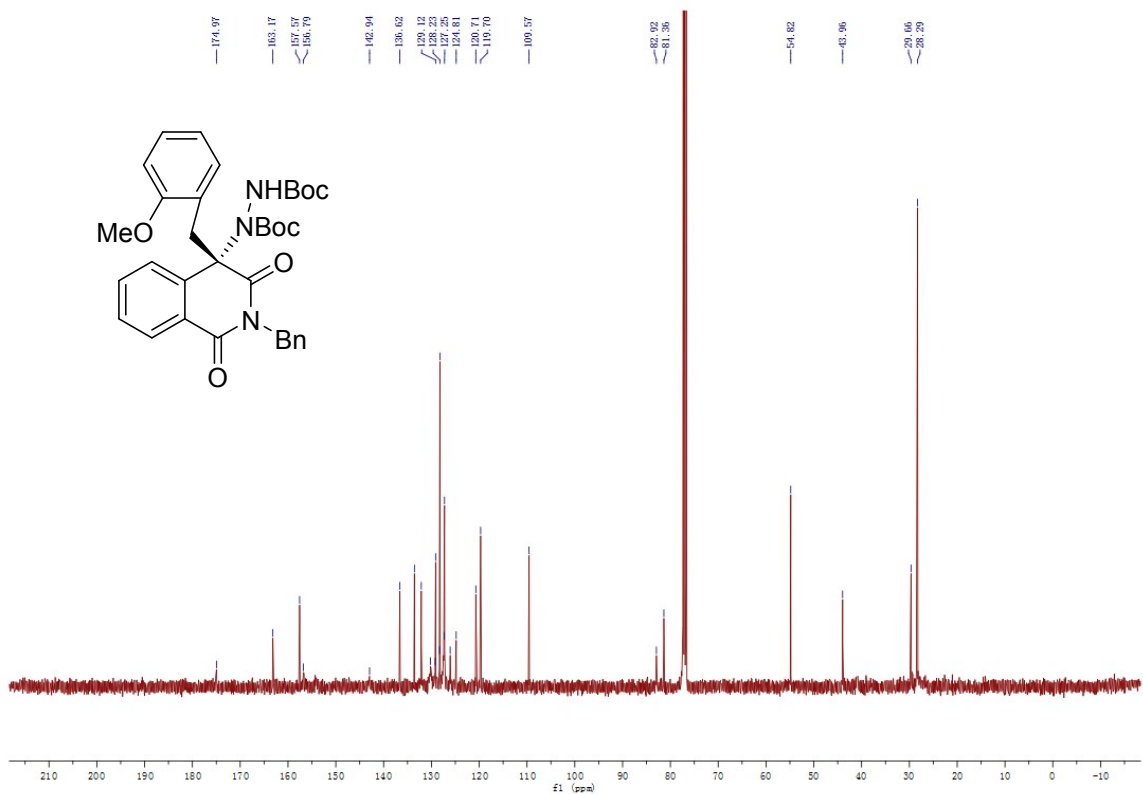



**di-tert-butyl(S)-1-(2-benzyl-4-(2-methylbenzyl)-1,3-dioxo-1,2,3,4-tetrahydroisoquinolin-4-yl)hydrazine-1,2-dicarboxylate (6n):**

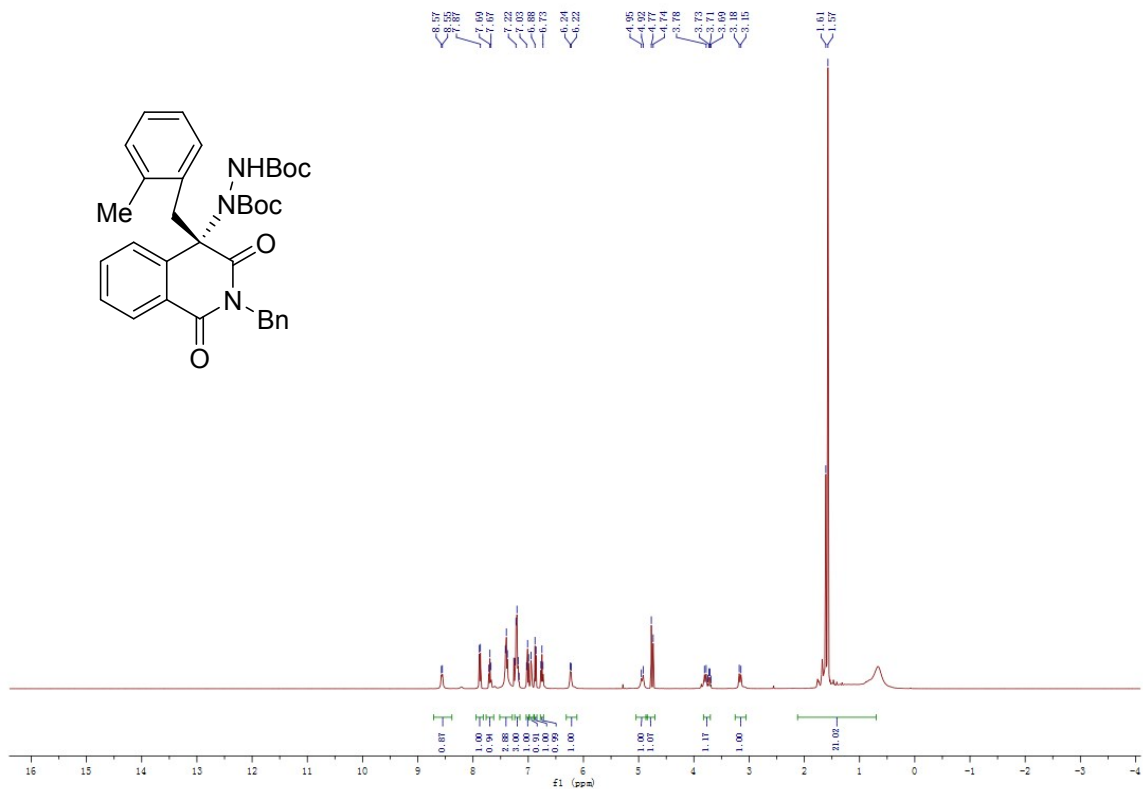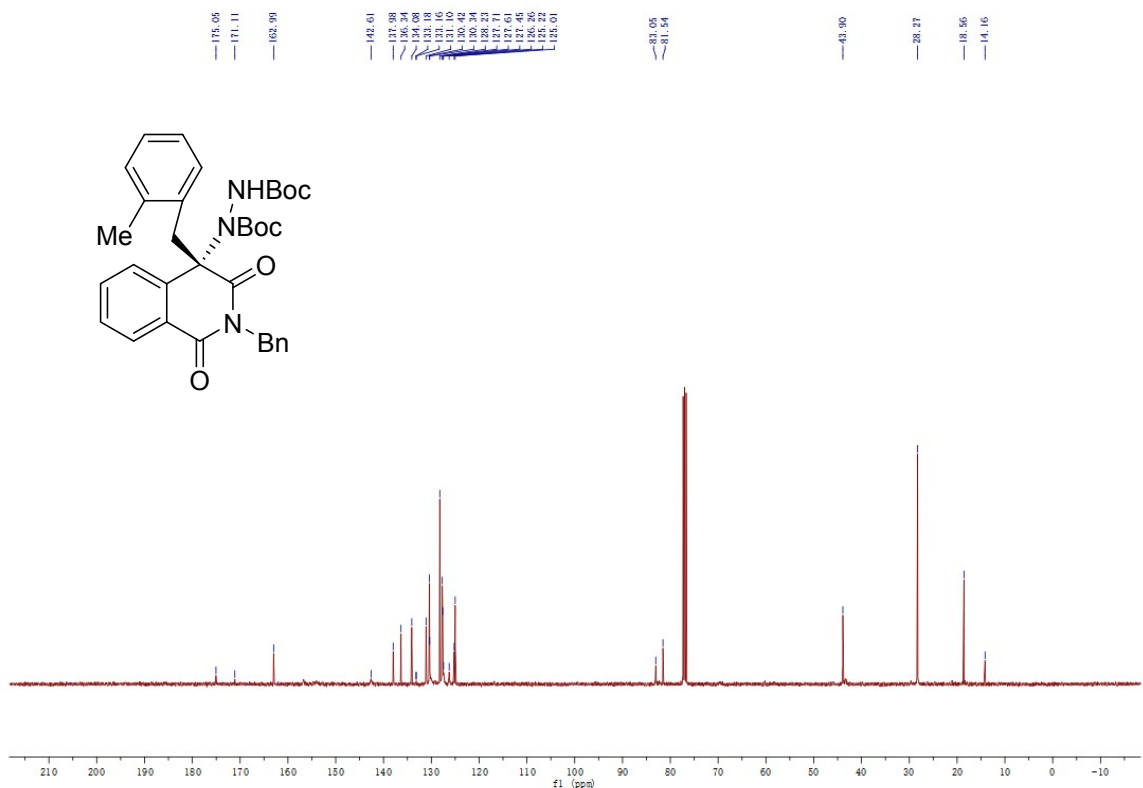

**di-tert-butyl(S)-1-(2-benzyl-4-(2-chlorobenzyl)-1,3-dioxo-1,2,3,4-tetrahydroisoquinolin-4-yl)hydrazine-1,2-dicarboxylate (60):**

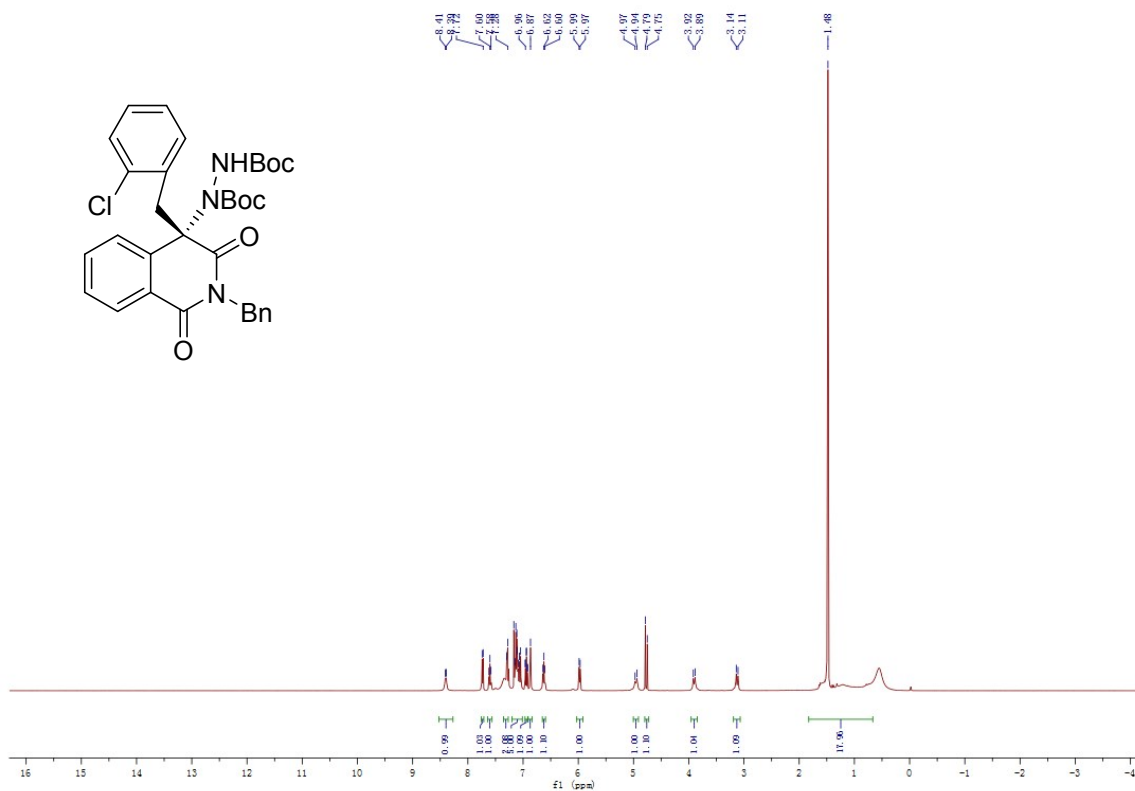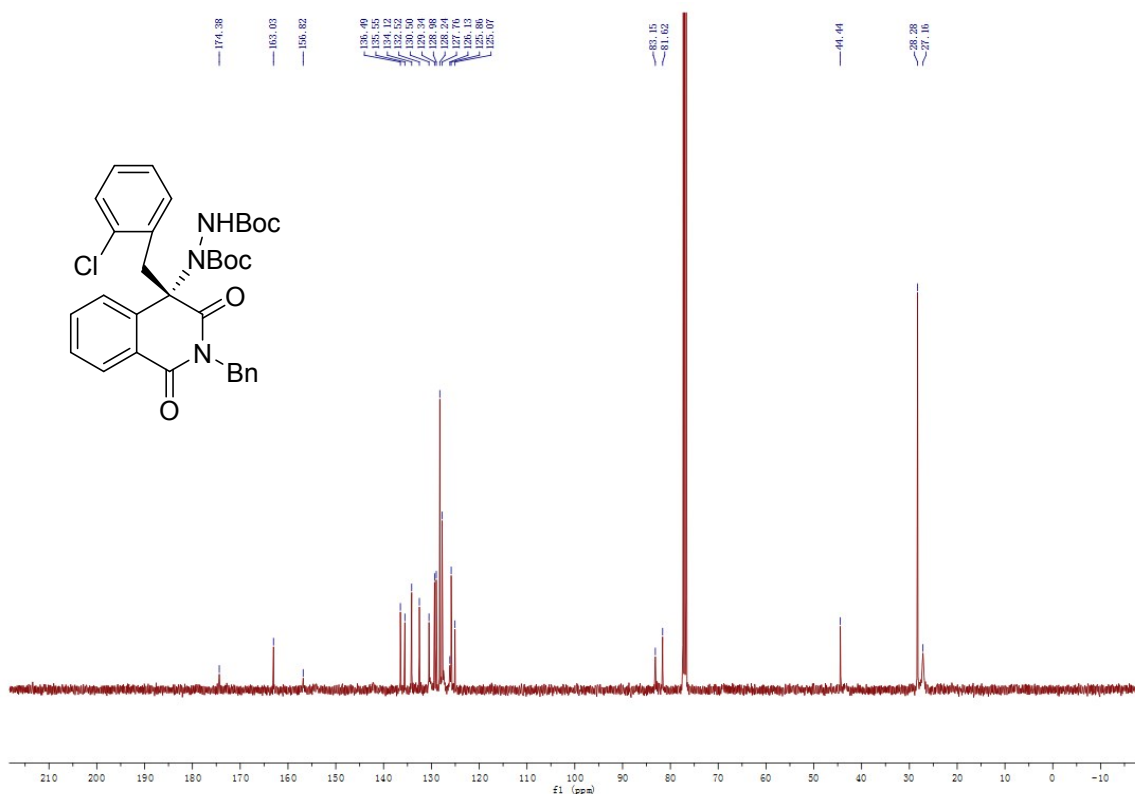

**di-tert-butyl(S)-1-(2-benzyl-1,3-dioxo-4-(3,4,5-trimethoxybenzyl)-1,2,3,4-tetrahydroisoquinolin-4-yl)hydrazine-1,2-dicarboxylate (6p):**

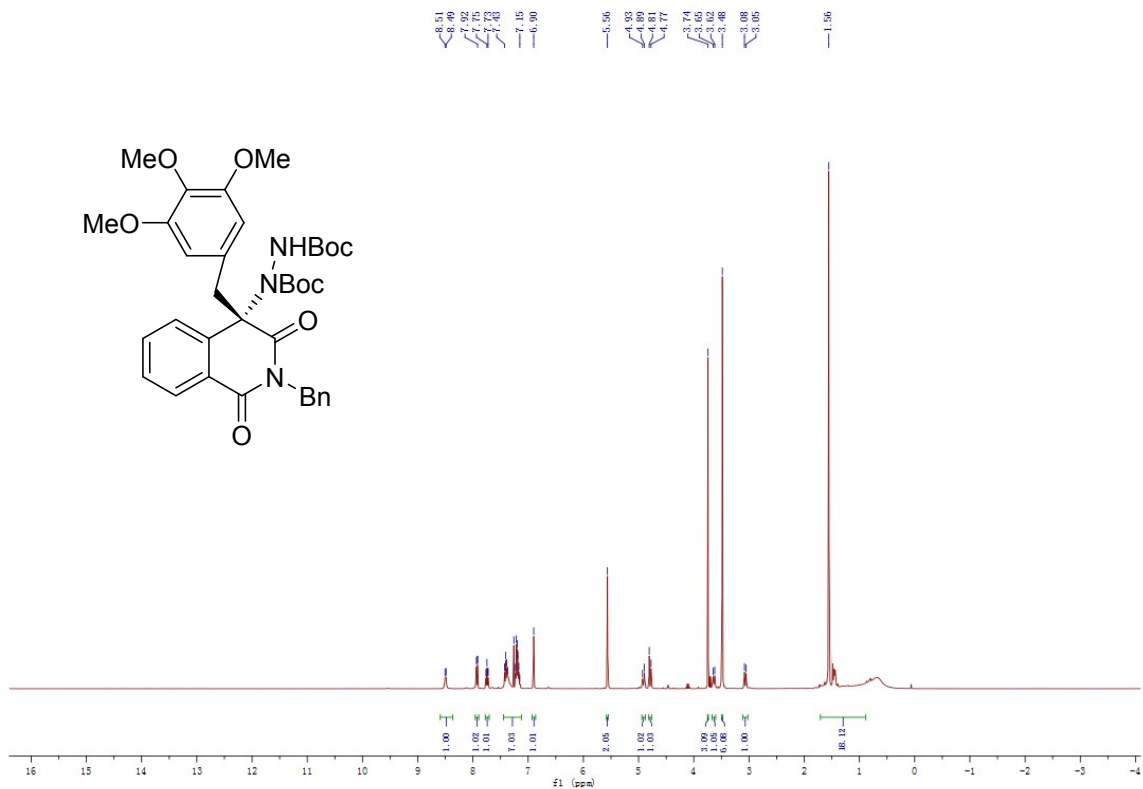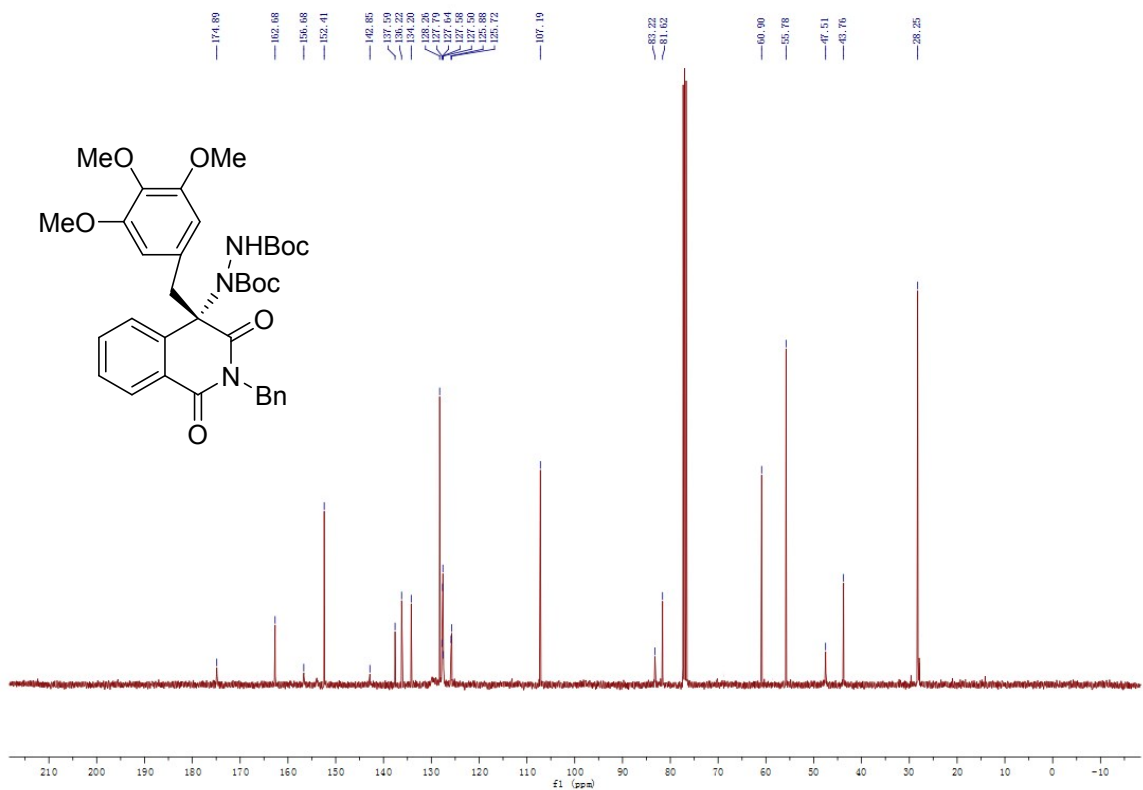

**di-tert-butyl(S)-1-(2-benzyl-4-(naphthalen-2-ylmethyl)-1,3-dioxo-1,2,3,4-tetrahydroisoquinolin-4-yl)hydrazine-1,2-dicarboxylate (6q):**

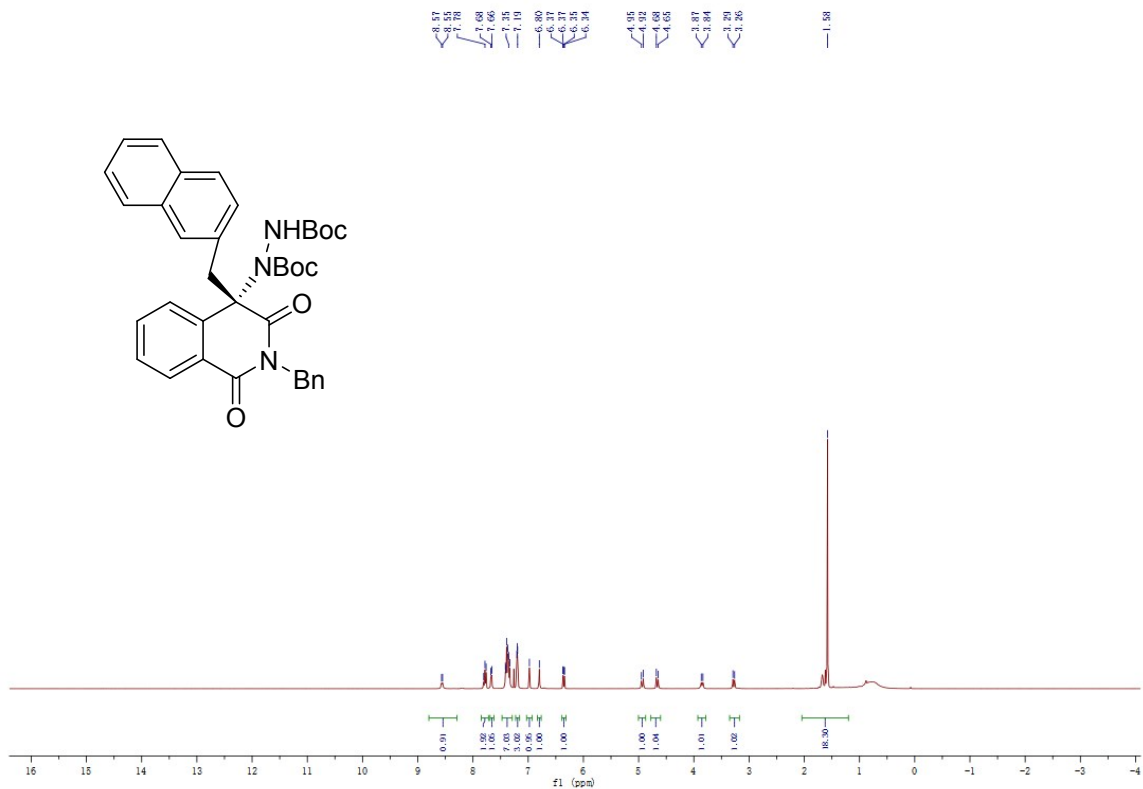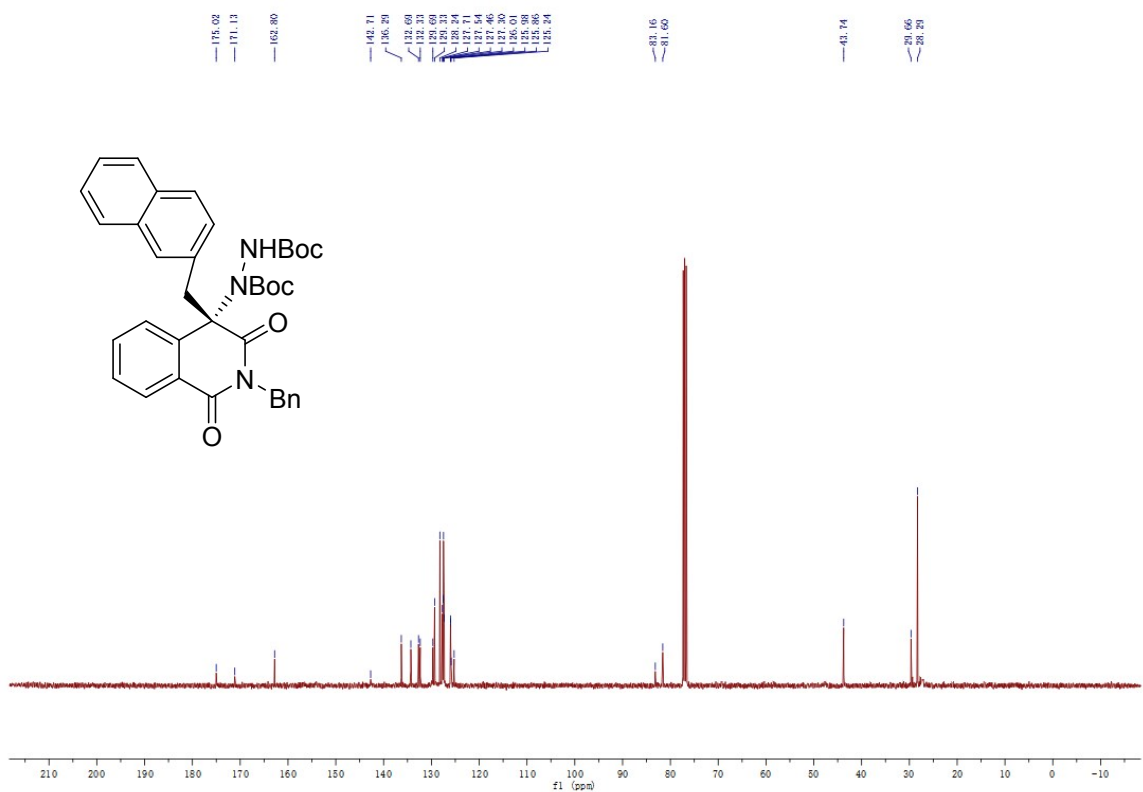

**di-tert-butyl(S)-1-(4-((1H-indol-2-yl)methyl)-2-benzyl-1,3-dioxo-1,2,3,4-tetrahydroisoquinolin-4-yl)hydrazine-1,2-dicarboxylate (6r):**

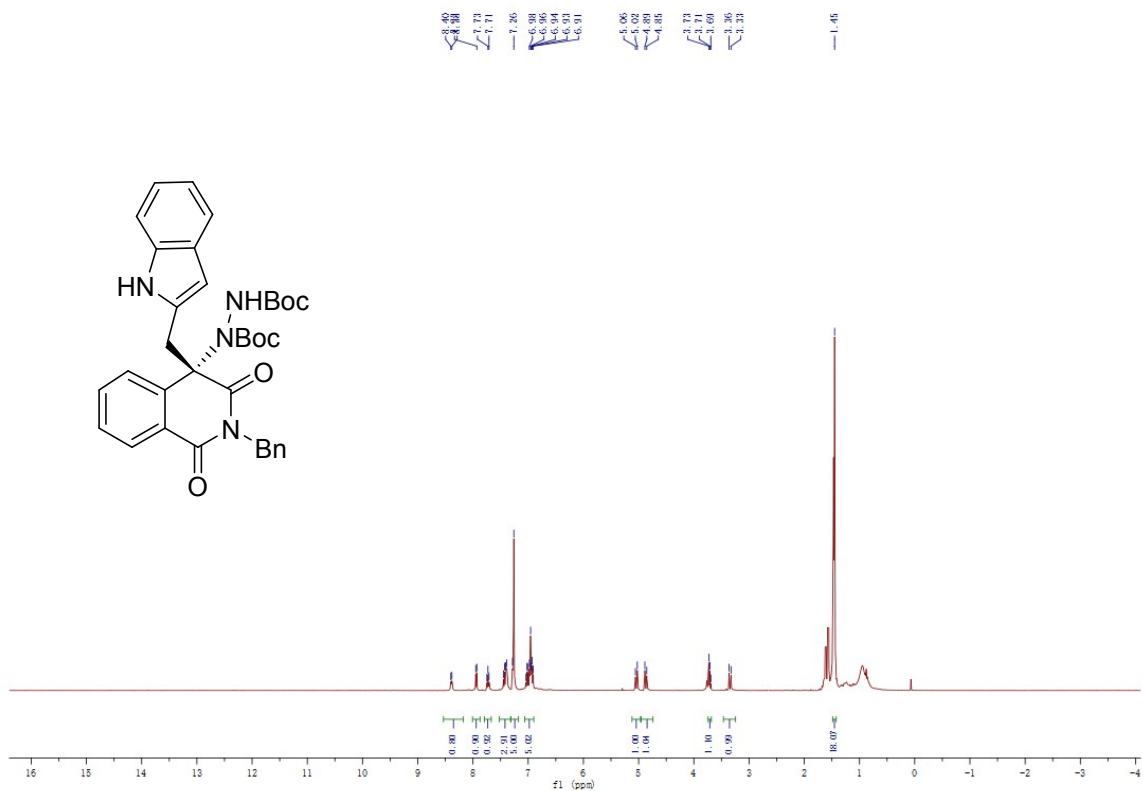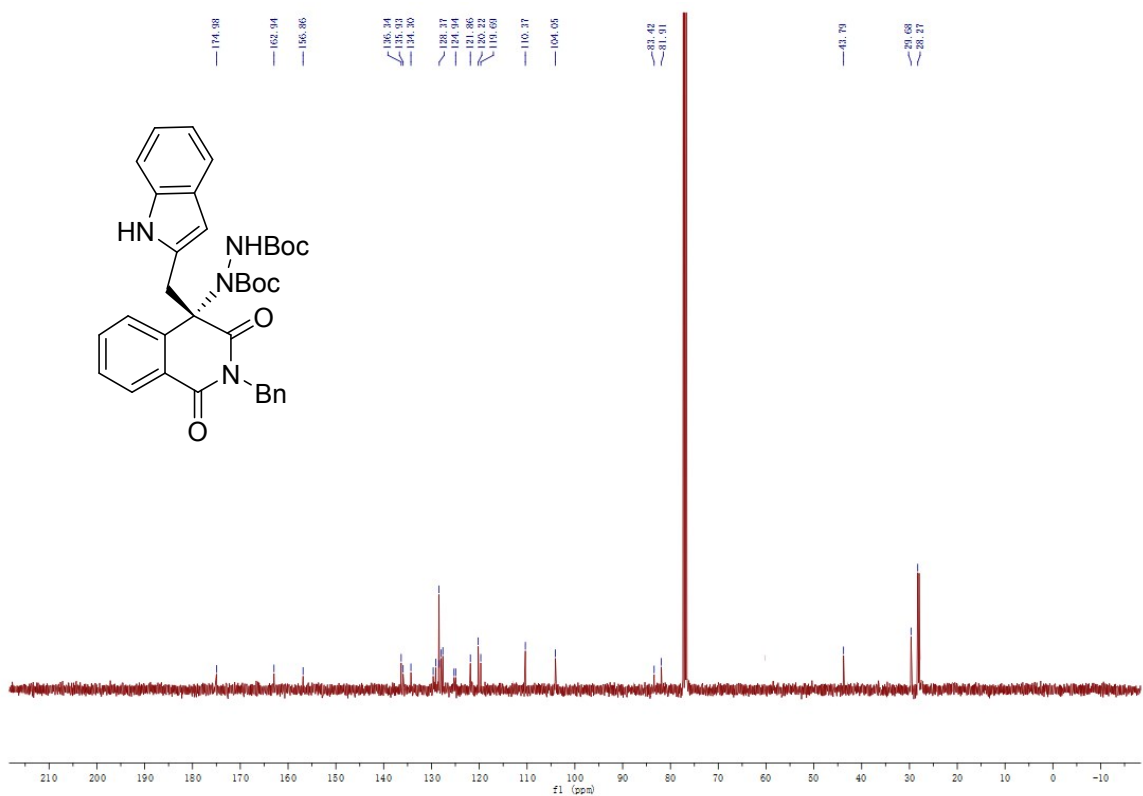

**di-tert-butyl(S)-1-(4-((1H-indol-3-yl)methyl)-2-benzyl-1,3-dioxo-1,2,3,4-tetrahydroisoquinolin-4-yl)hydrazine-1,2-dicarboxylate (6s):**

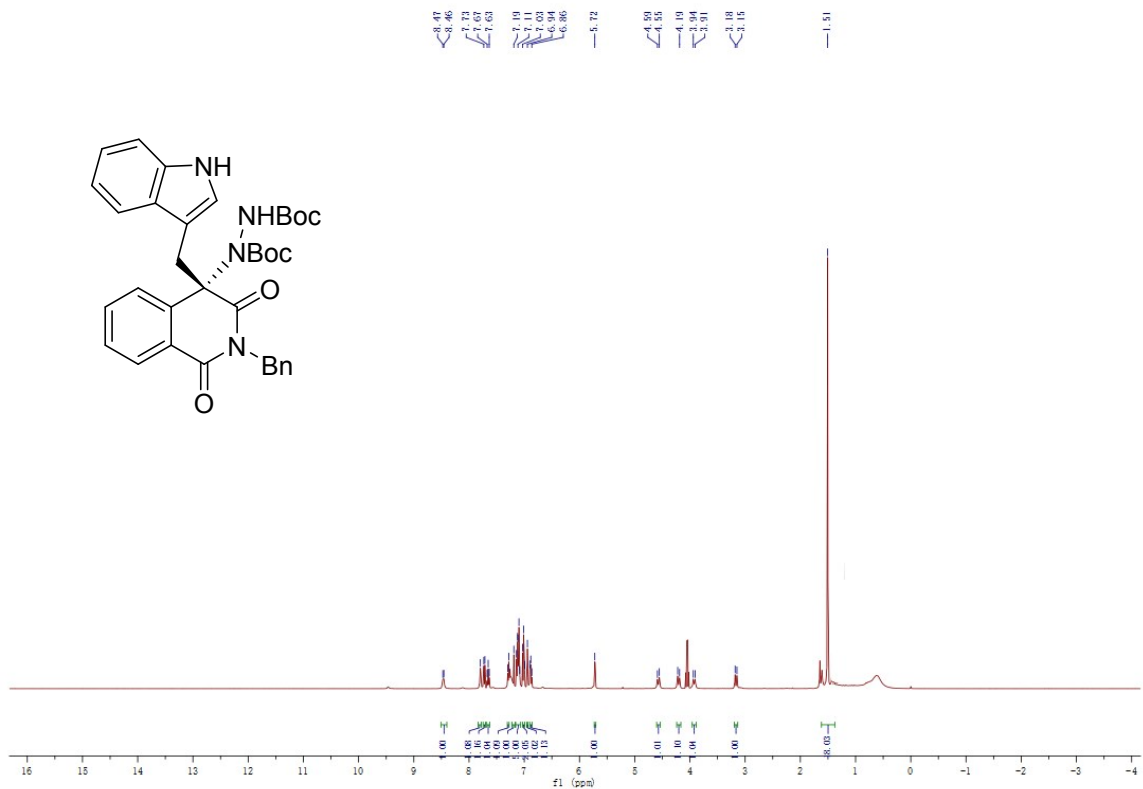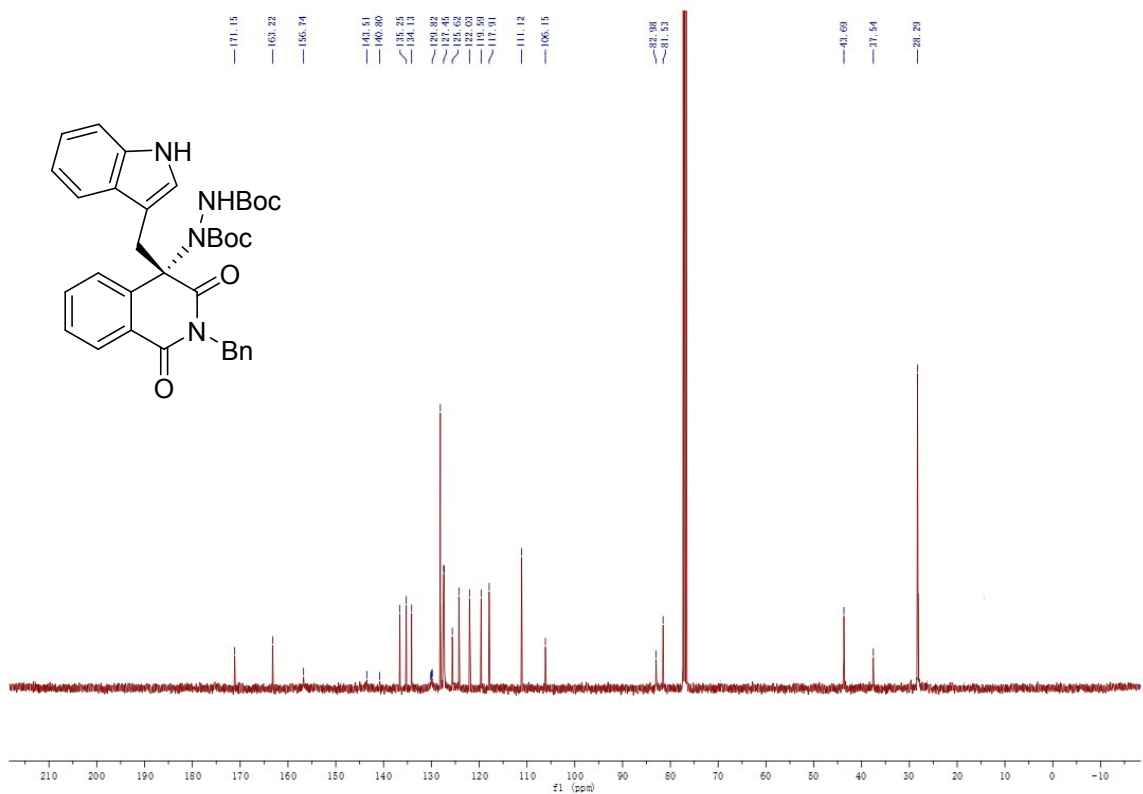

**di-tert-butyl(S)-1-(2-benzyl-4-((2-methyl-1H-indol-3-yl)methyl)-1,3-dioxo-1,2,3,4-tetrahydroisoquinolin-4-yl)hydrazine-1,2-dicarboxylate (6t):**

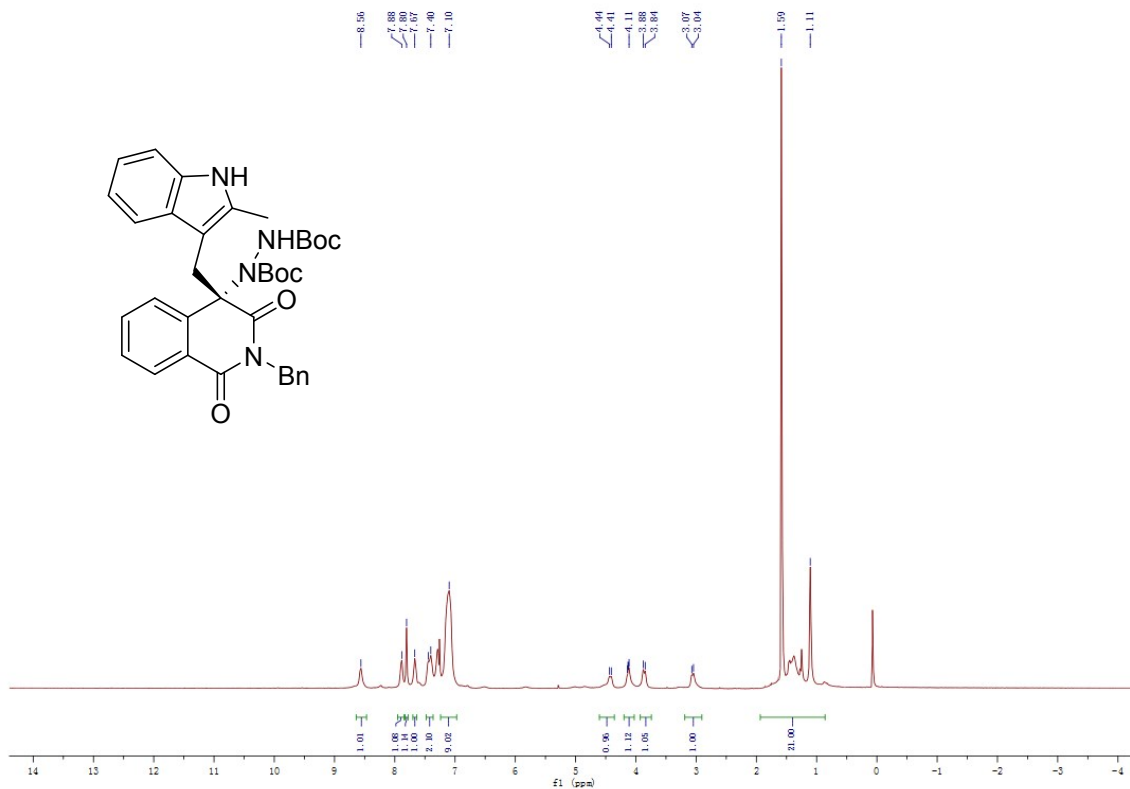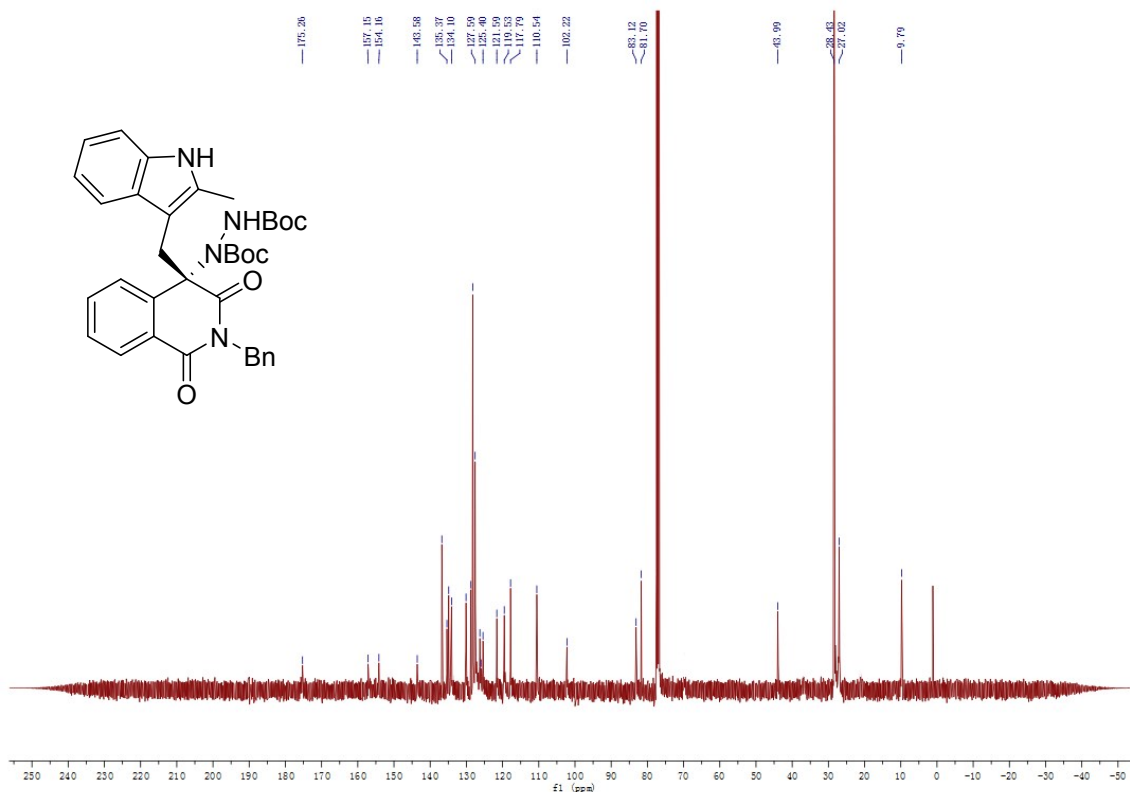

**di-tert-butyl(S)-1-(2-benzyl-4-(furan-2-ylmethyl)-1,3-dioxo-1,2,3,4-tetrahydroisoquinolin-4-yl)hydrazine-1,2-dicarboxylate (6u):**

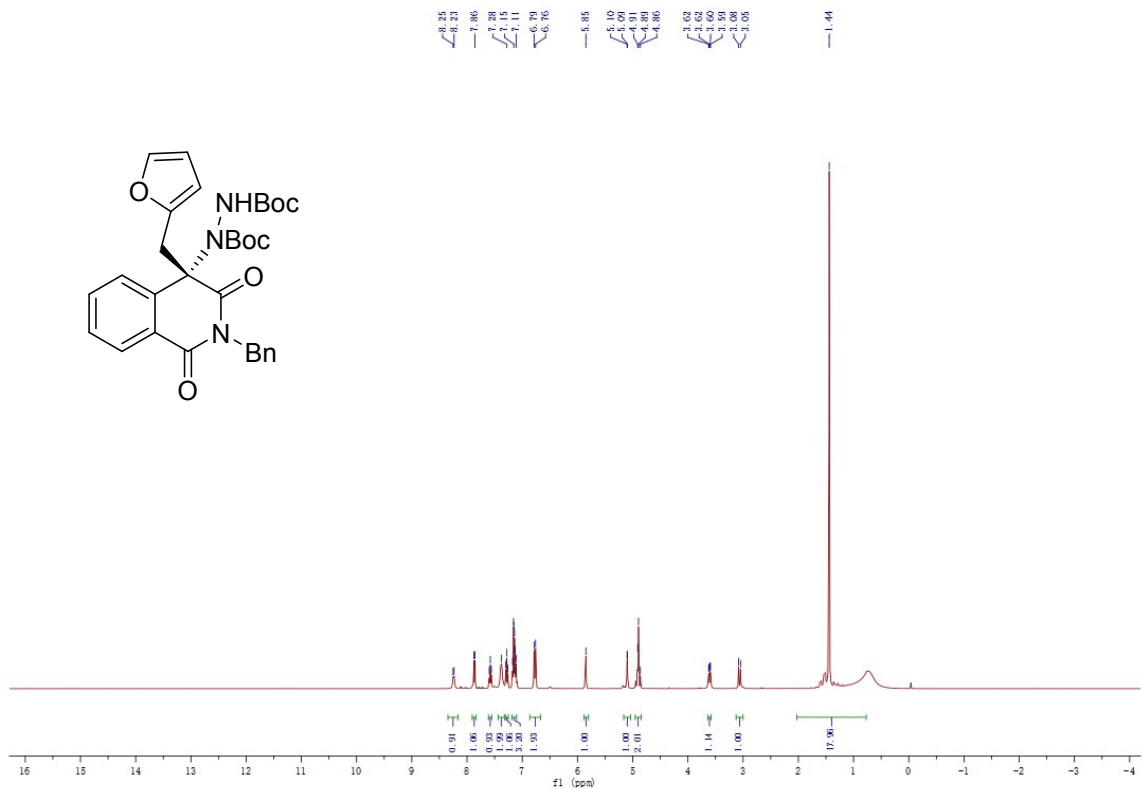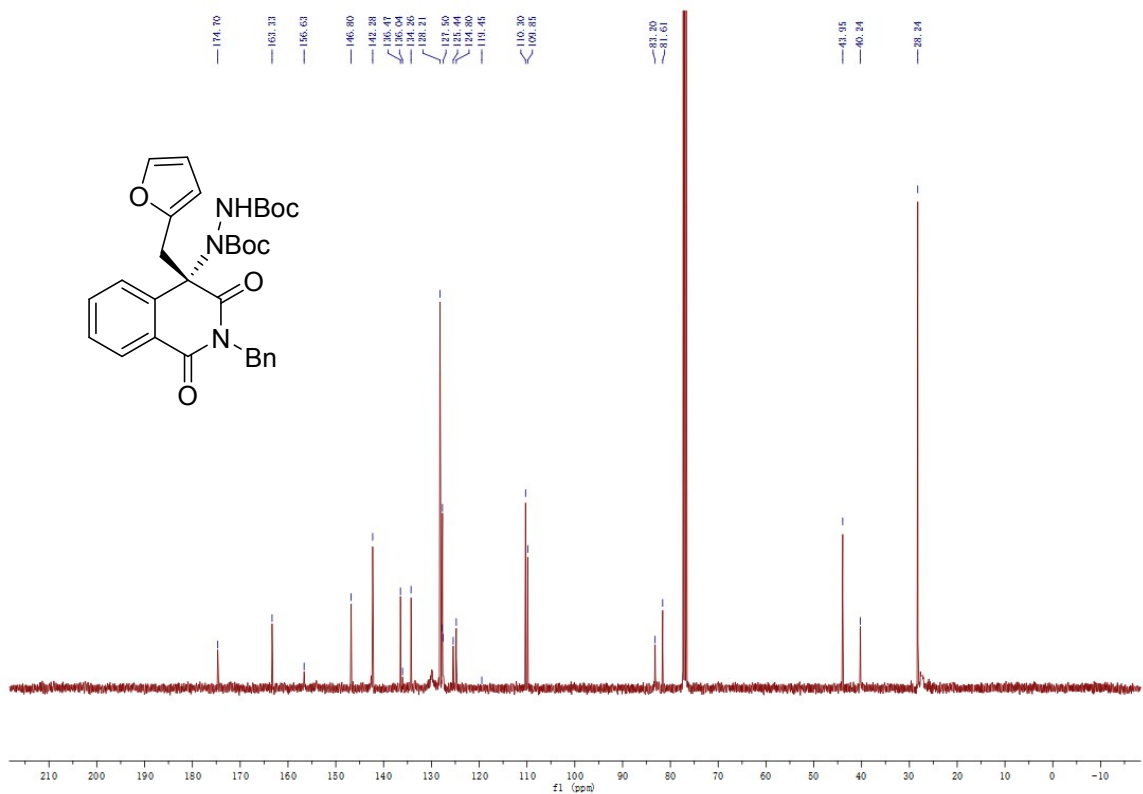



**diethyl (S)-1-(2-benzyl-4-butyl-1,3-dioxo-1,2,3,4-tetrahydroisoquinolin-4-yl)hydrazine-1,2-dicarboxylate (6v):**

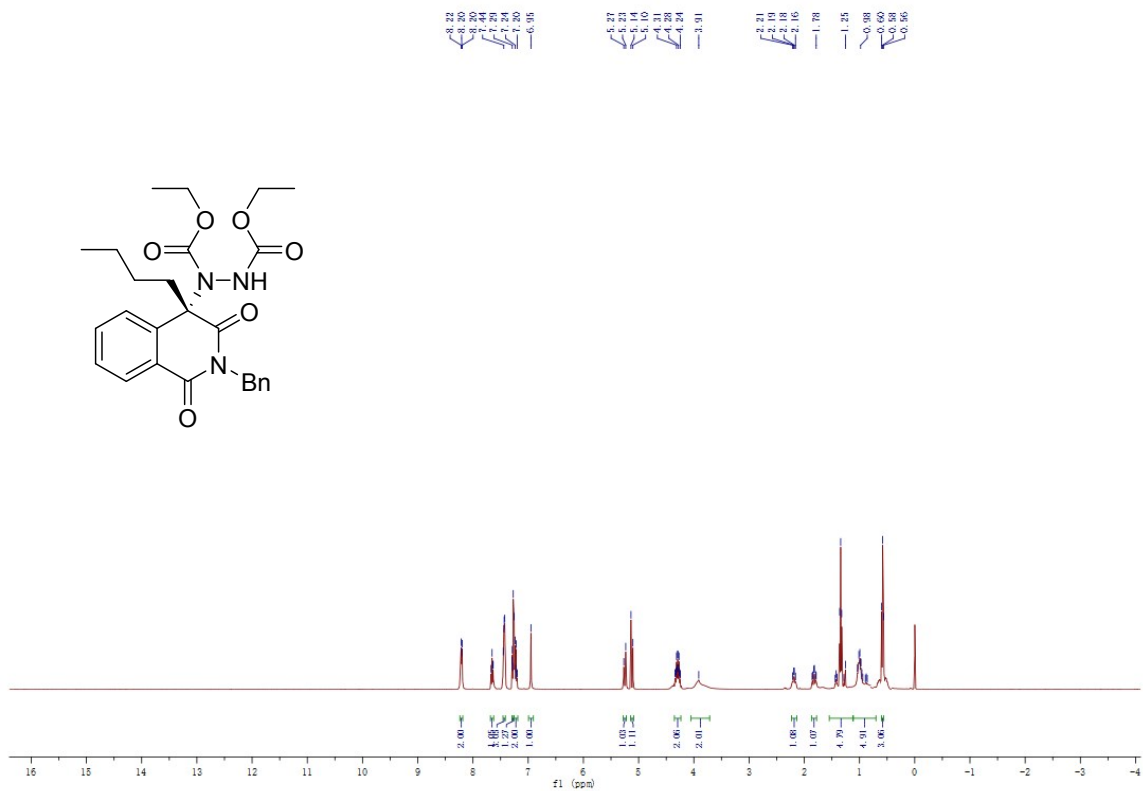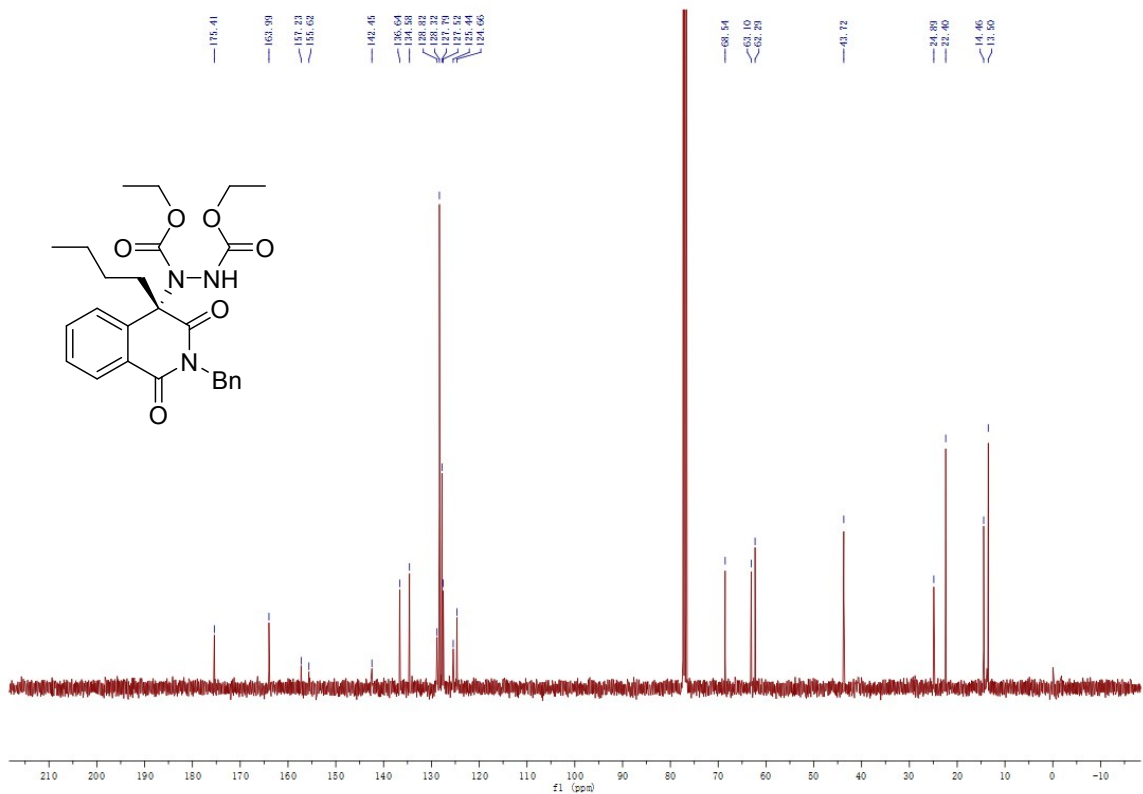

**diisopropyl (S)-1-(2-benzyl-4-butyl-1,3-dioxo-1,2,3,4-tetrahydroisoquinolin-4-yl)hydrazine-1,2-dicarboxylate (6w):**

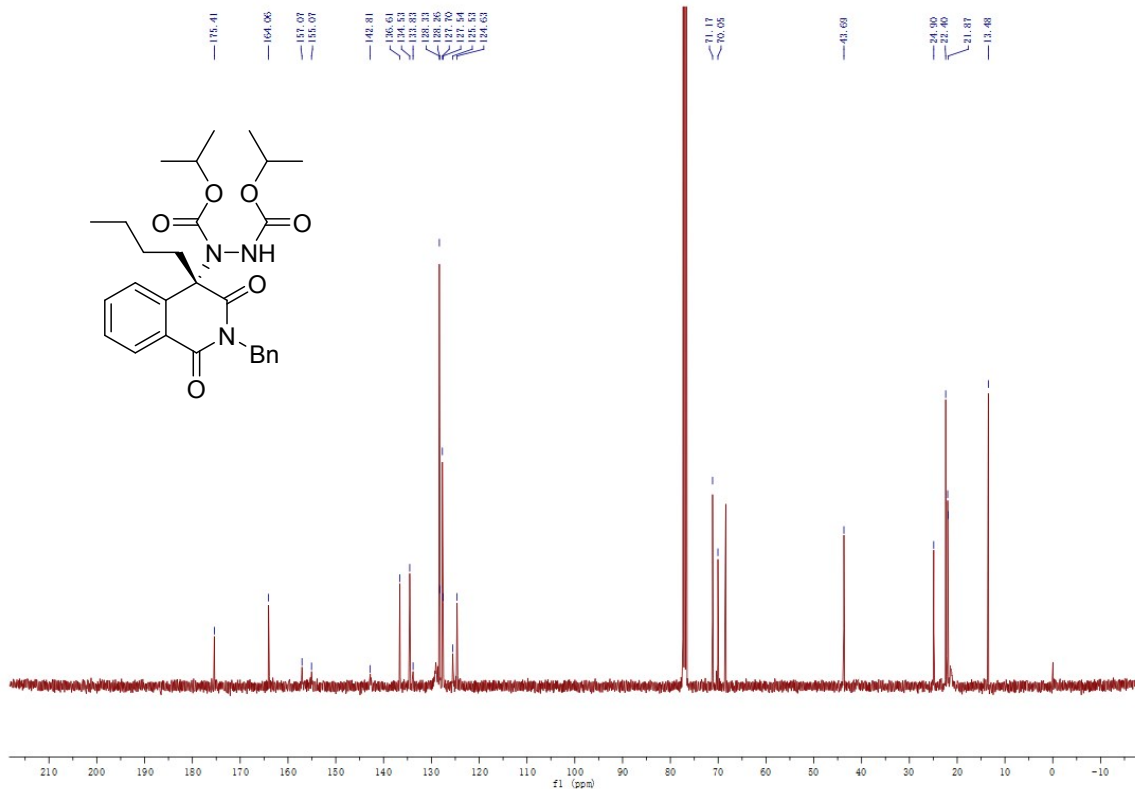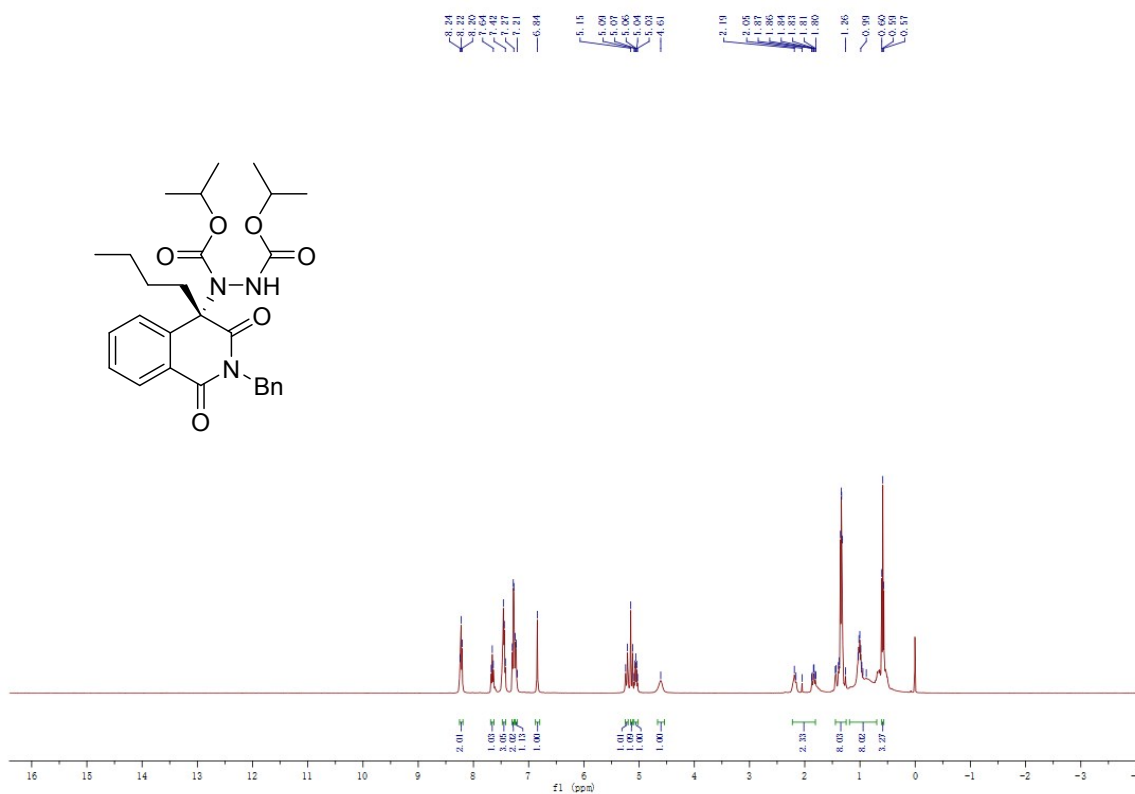

(R)-N-benzyl-1-(4-chlorobenzyl)-3-oxoindoline-1-carboxamide (7):

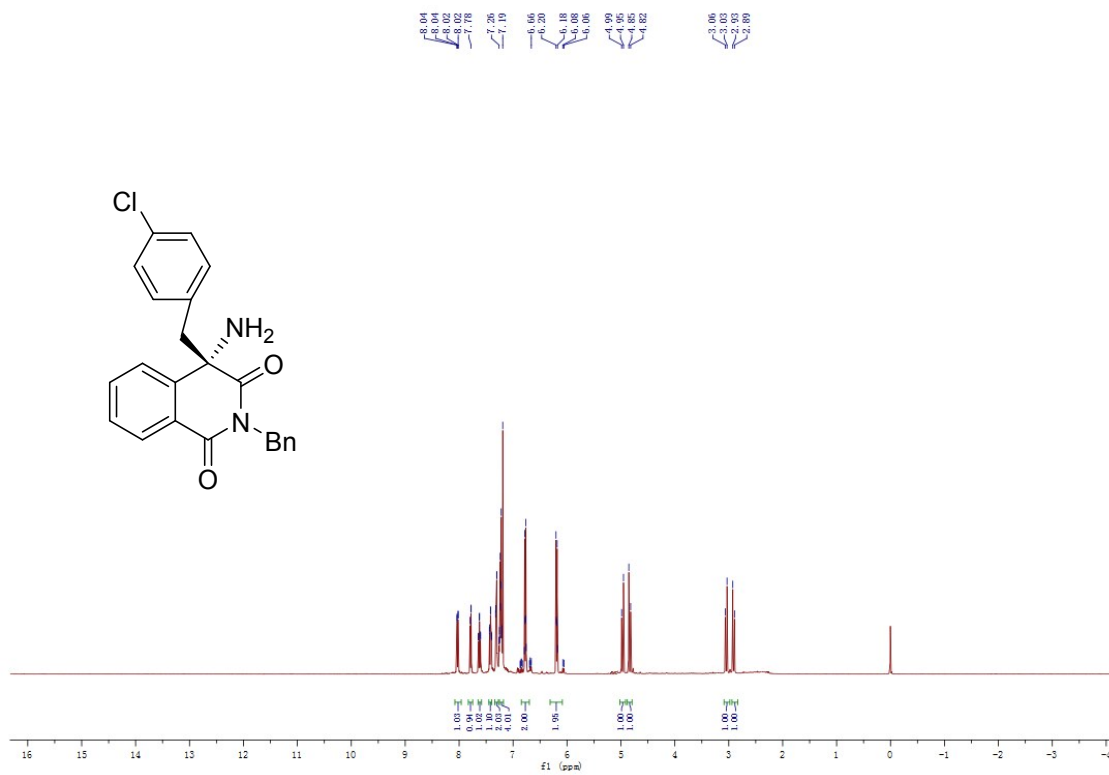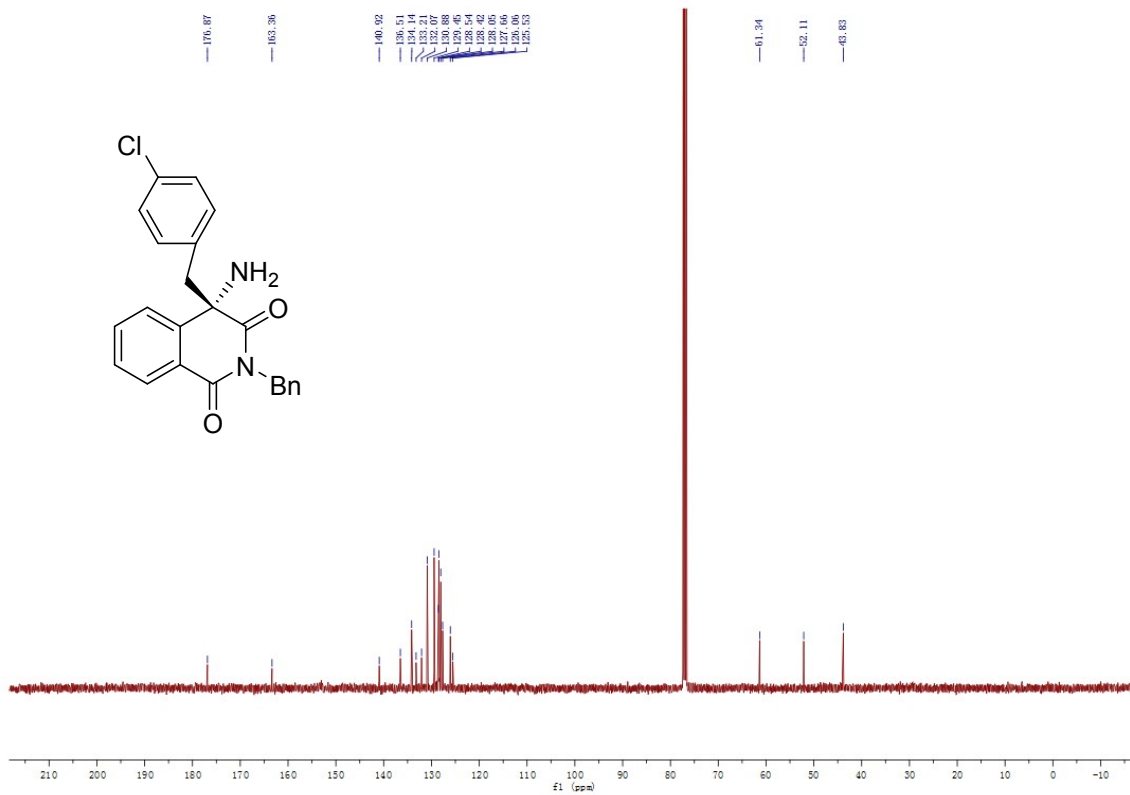

## 9. HPLC spectra

di-tert-butyl(S)-1-(2-benzyl-4-butyl-1,3-dioxo-1,2,3,4-tetrahydroisoquinolin-4-yl)hydrazine-1,2-dicarboxylate (6a):

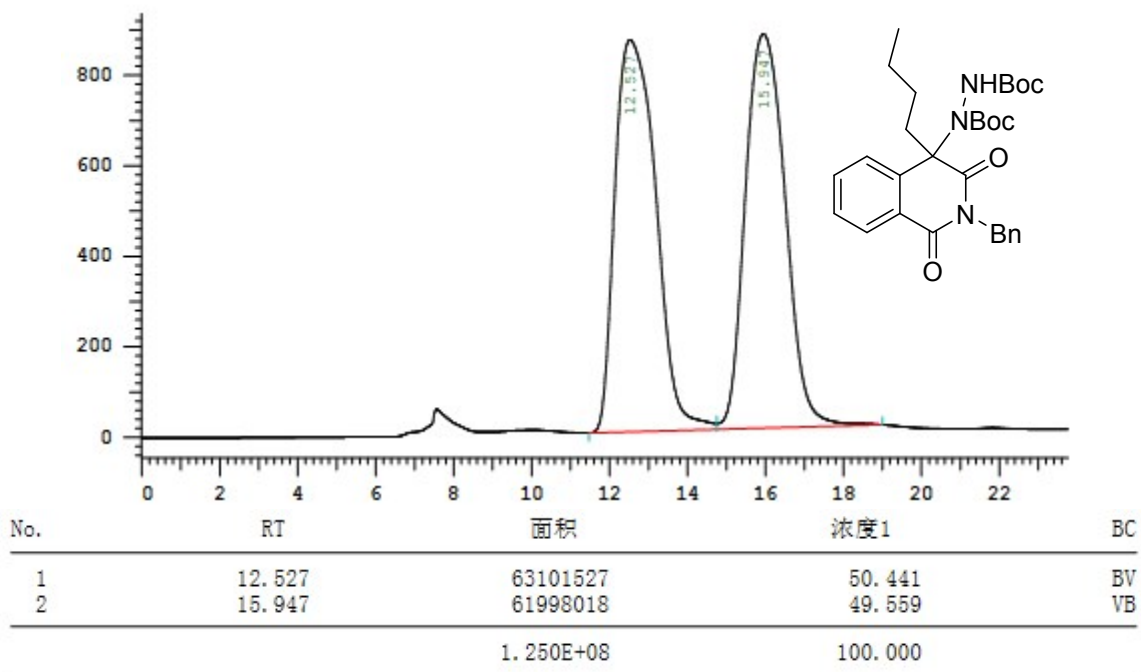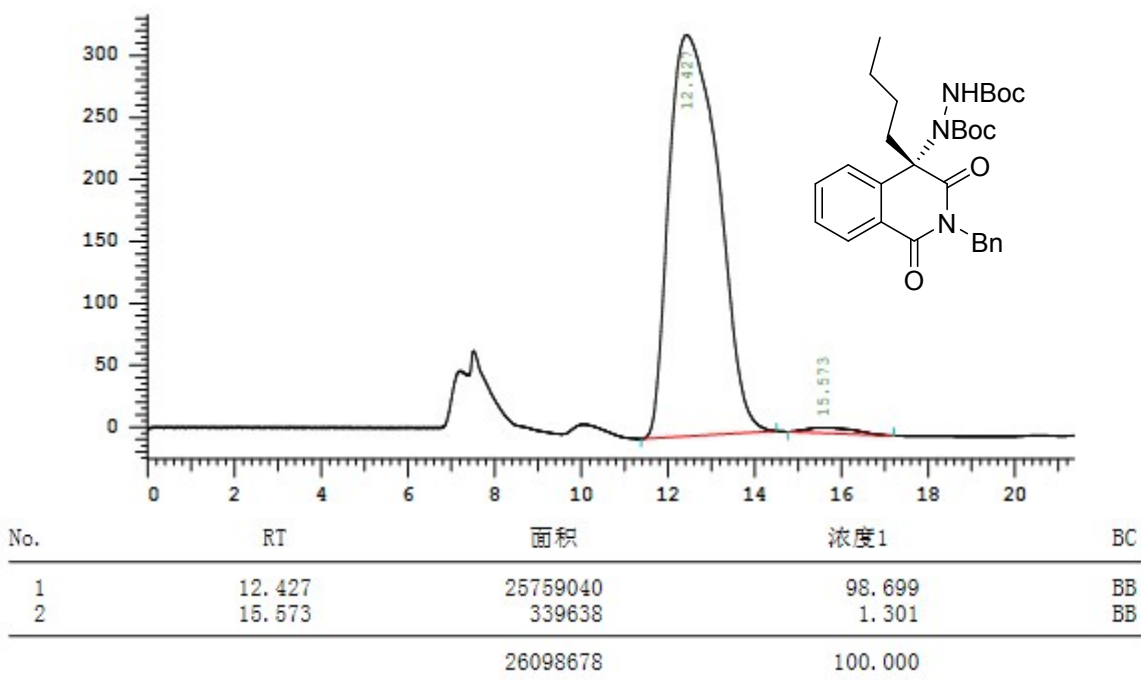

**di-tert-butyl(S)-1-(2-benzyl-4-isopentyl-1,3-dioxo-1,2,3,4-tetrahydroisoquinolin-4-yl)hydrazine-1,2-dicarboxylate (6b):**

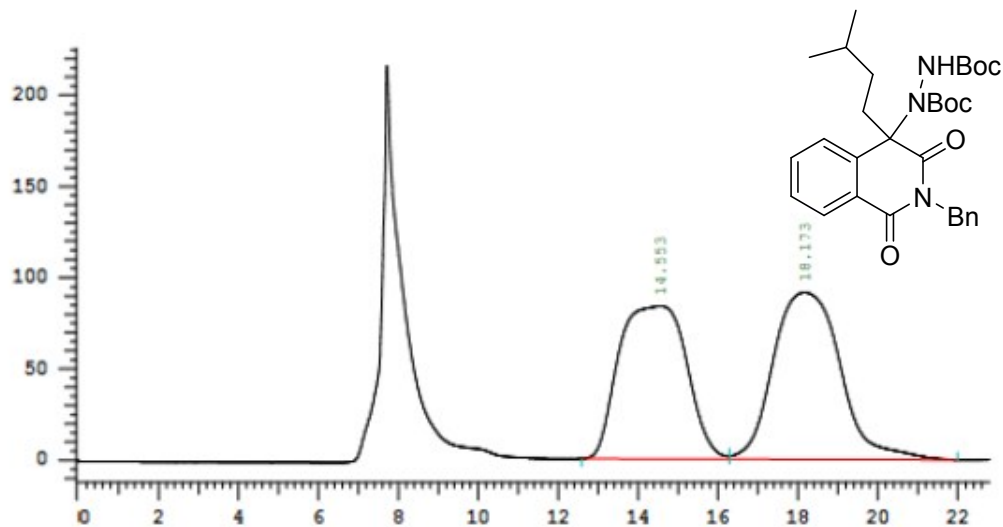

| No. | RT     | 面积      | 浓度1     | BC |
|-----|--------|---------|---------|----|
| 1   | 14.553 | 2146759 | 48.034  | BV |
| 2   | 18.173 | 2322505 | 51.966  | VB |
|     |        | 4469264 | 100.000 |    |

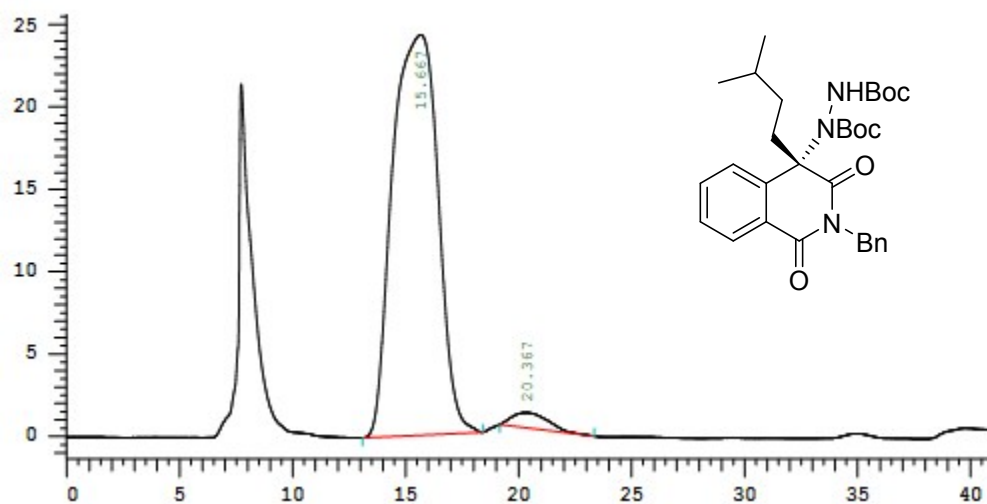

| No. | RT     | 面积      | 浓度1     | BC |
|-----|--------|---------|---------|----|
| 1   | 15.667 | 3390546 | 97.034  | BB |
| 2   | 20.367 | 103623  | 2.966   | BB |
|     |        | 3494169 | 100.000 |    |

**di-tert-butyl(S)-1-(2-benzyl-4-isobutyl-1,3-dioxo-1,2,3,4-tetrahydroisoquinolin-4-yl)hydrazine-1,2-dicarboxylate (6c):**

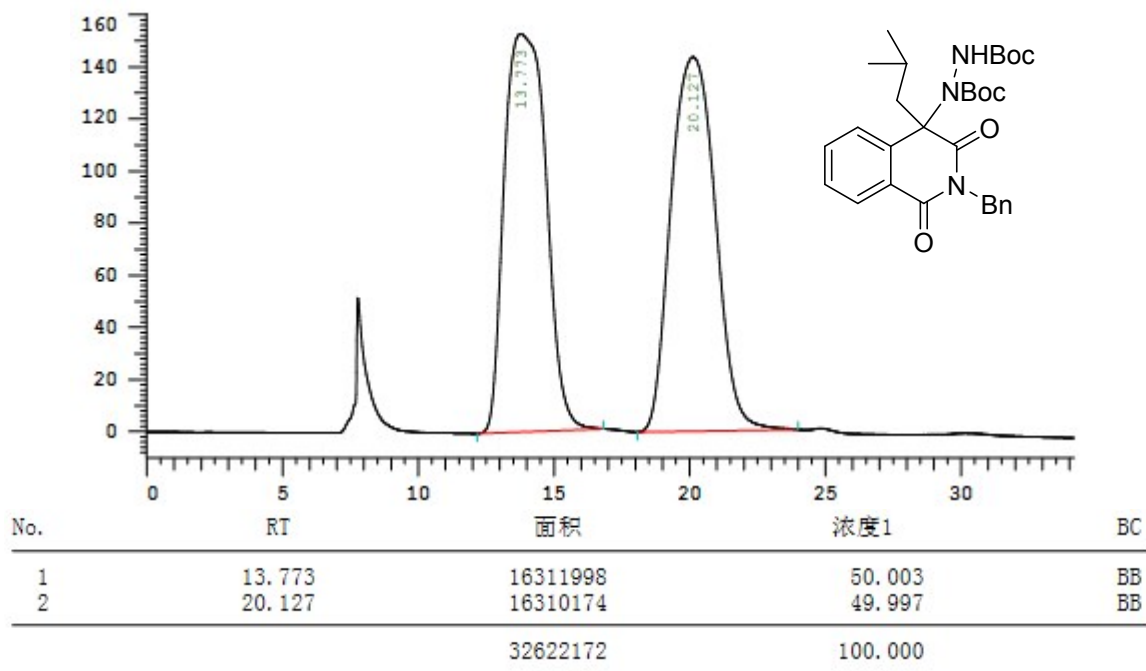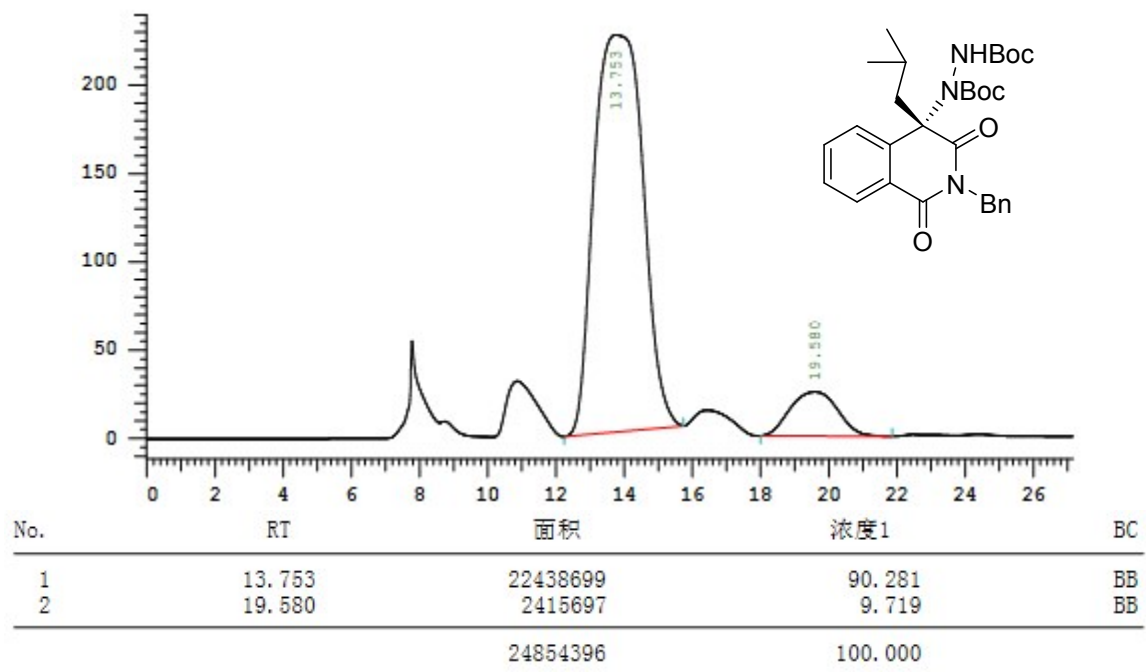

**di-tert-butyl(S)-1-(2-benzyl-1,3-dioxo-4-(3-phenylpropyl)-1,2,3,4-tetrahydroisoquinolin-4-yl)hydrazine-1,2-dicarboxylate(6d):**

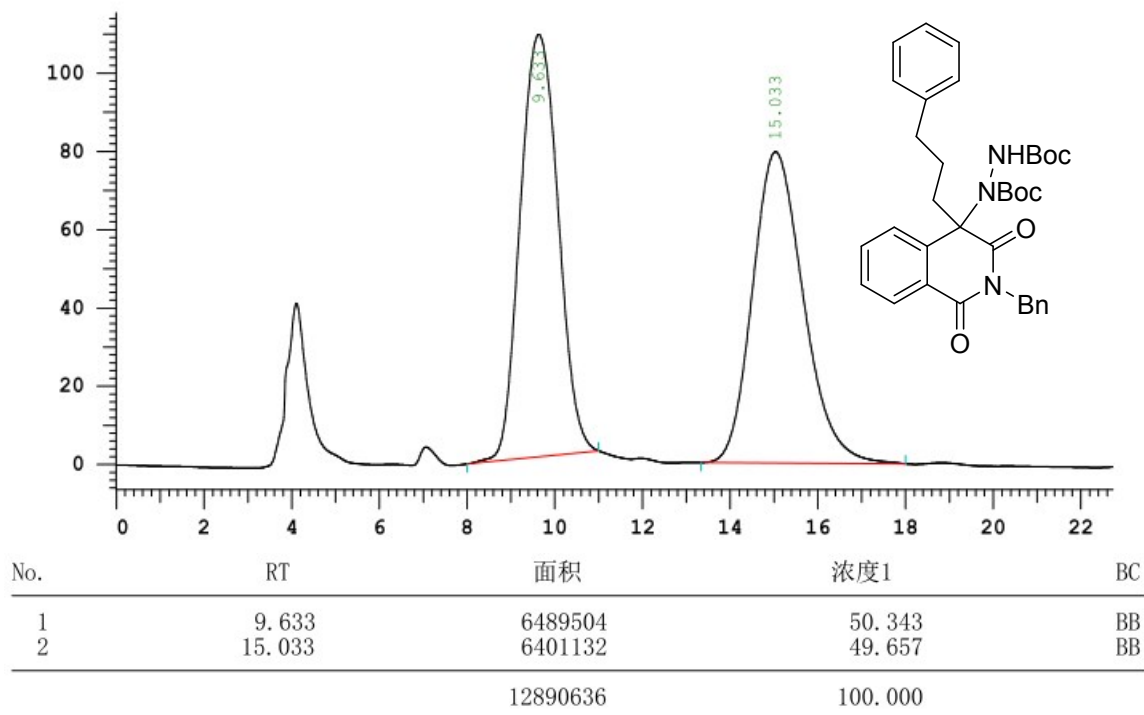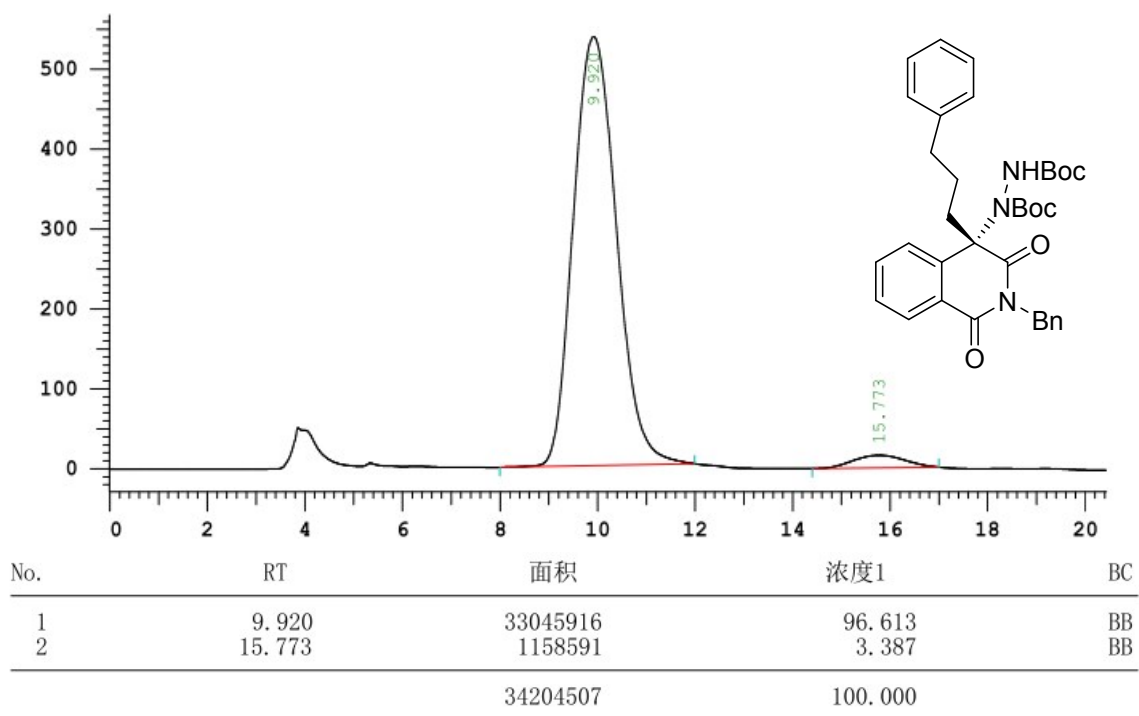

**(di-tert-butyl(S)-1-(2,4-dibenzyl-1,3-dioxo-1,2,3,4-tetrahydroisoquinolin-4-yl)hydrazine-1,2-dicarboxylate (6e):**

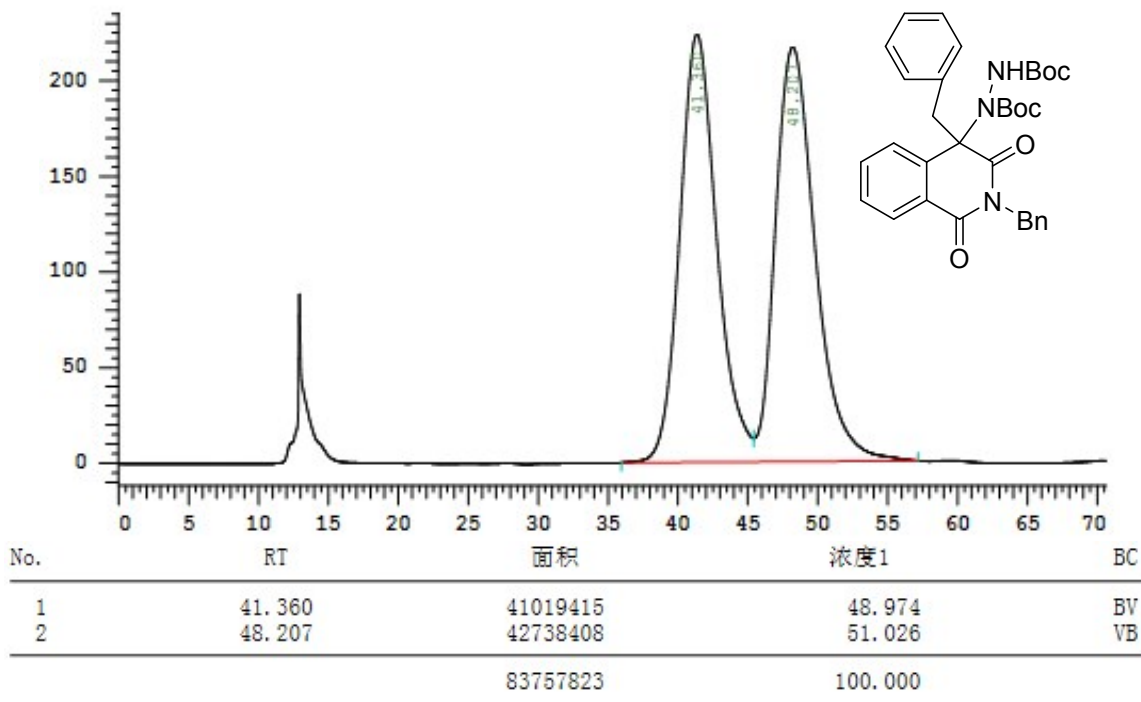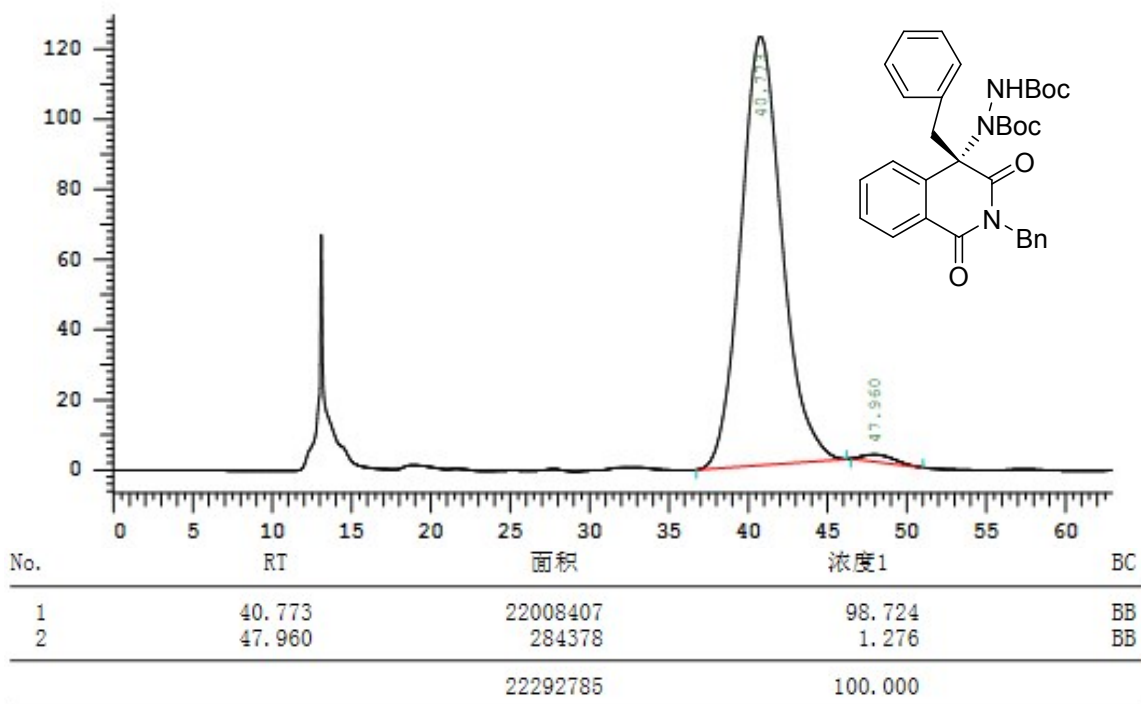



**di-tert-butyl(S)-1-(2-benzyl-4-(4-methylbenzyl)-1,3-dioxo-1,2,3,4-tetrahydroisoquinolin-4-yl)hydrazine-1,2-dicarboxylate (6f):**

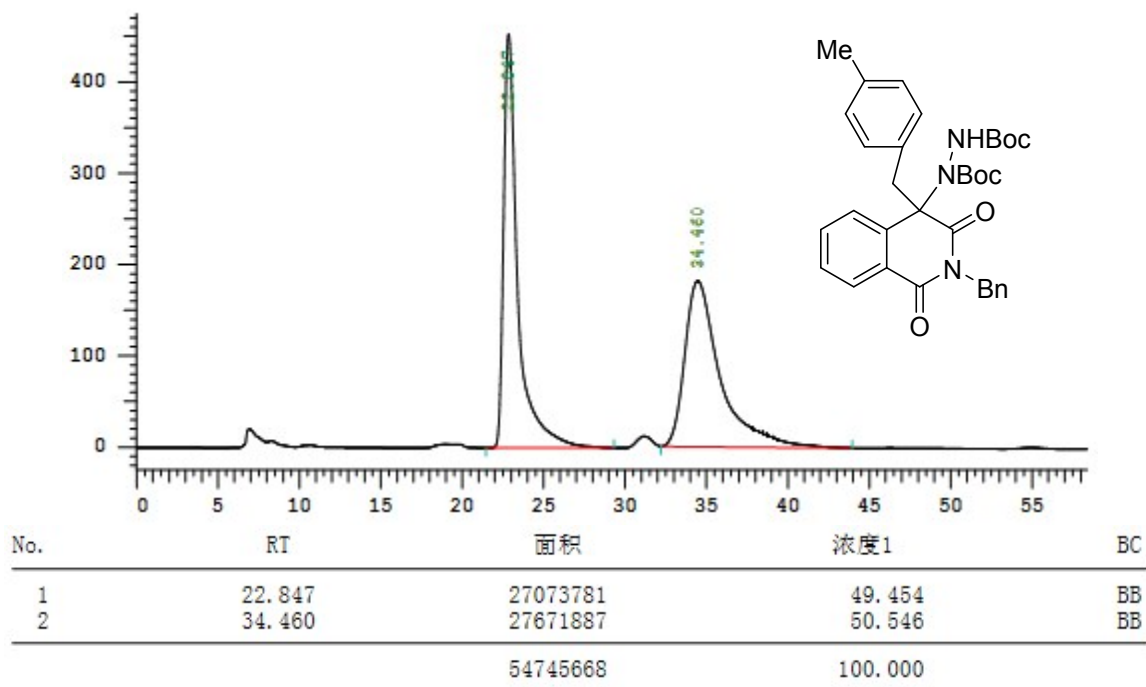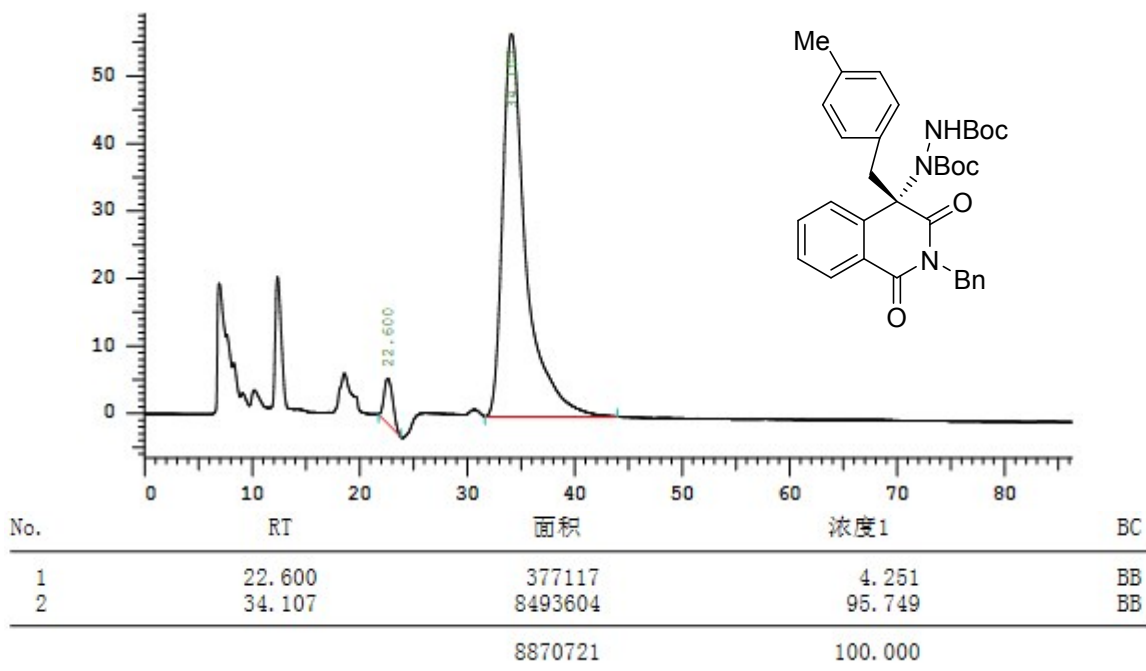

**di-tert-butyl(S)-1-(2-benzyl-4-(4-methoxybenzyl)-1,3-dioxo-1,2,3,4-tetrahydroisoquinolin-4-yl)hydrazine-1,2-dicarboxylate (6g):**

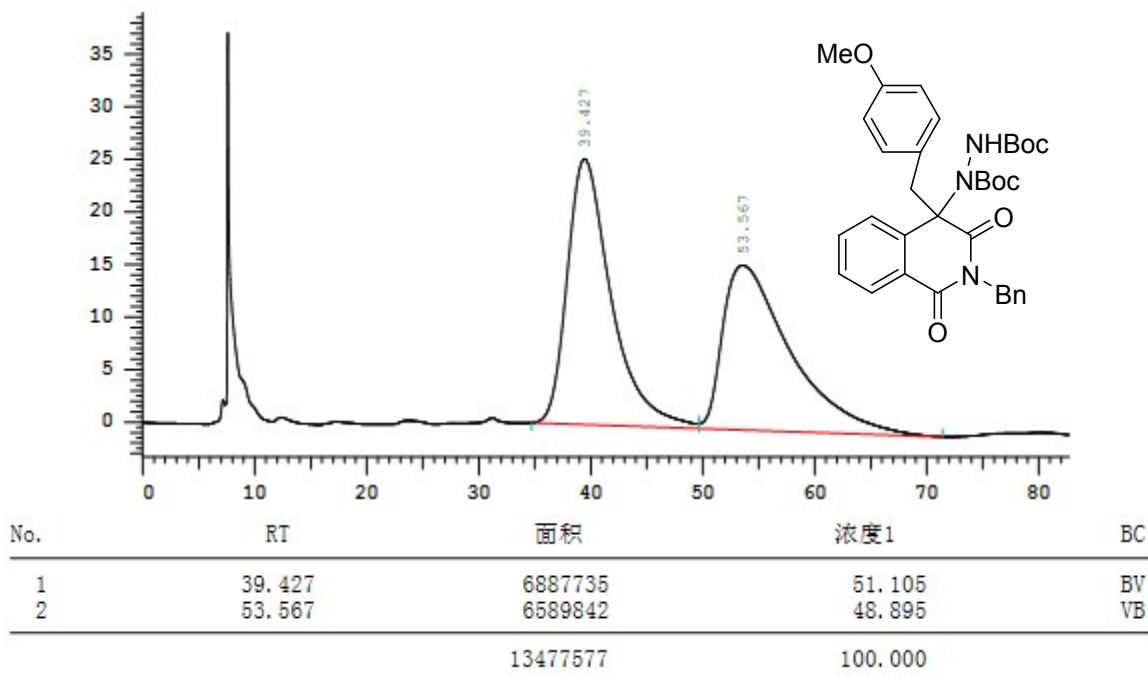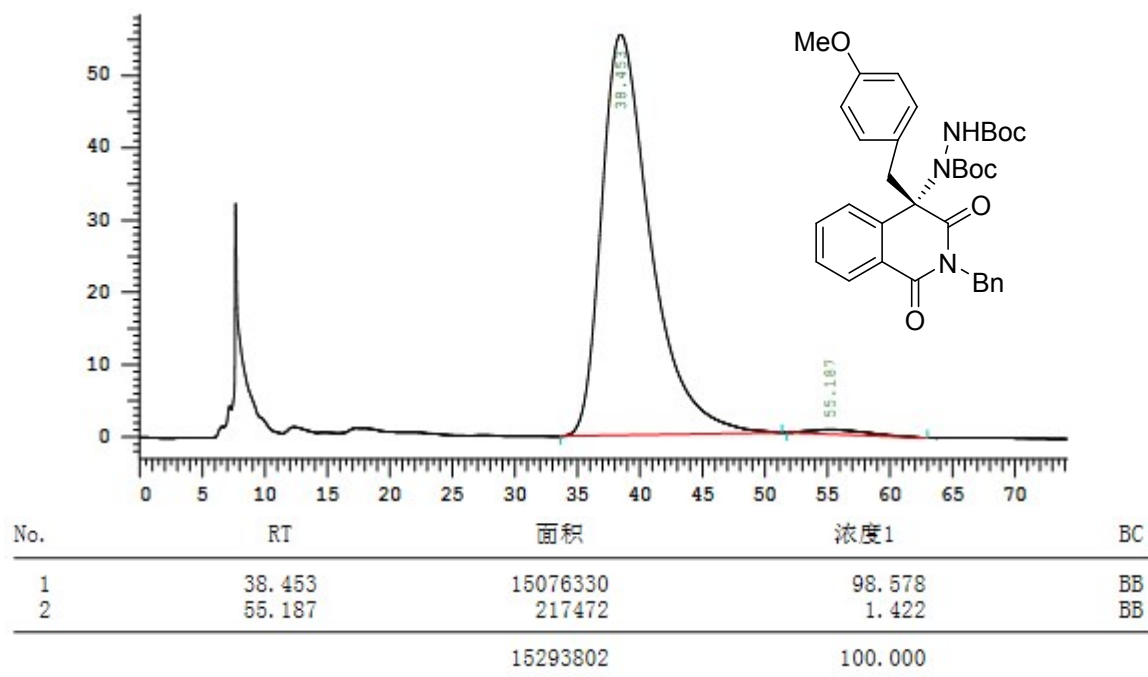

**di-tert-butyl(S)-1-(2-benzyl-4-(4-fluorobenzyl)-1,3-dioxo-1,2,3,4-tetrahydroisoquinolin-4-yl)hydrazine-1,2-dicarboxylate (6h):**

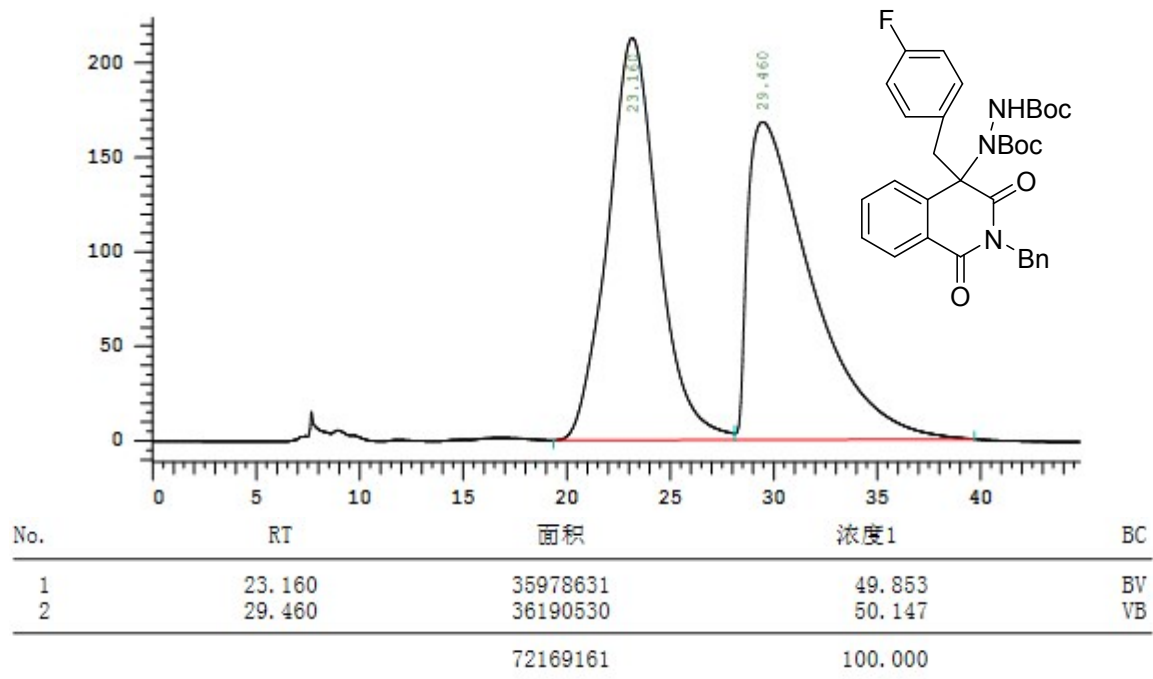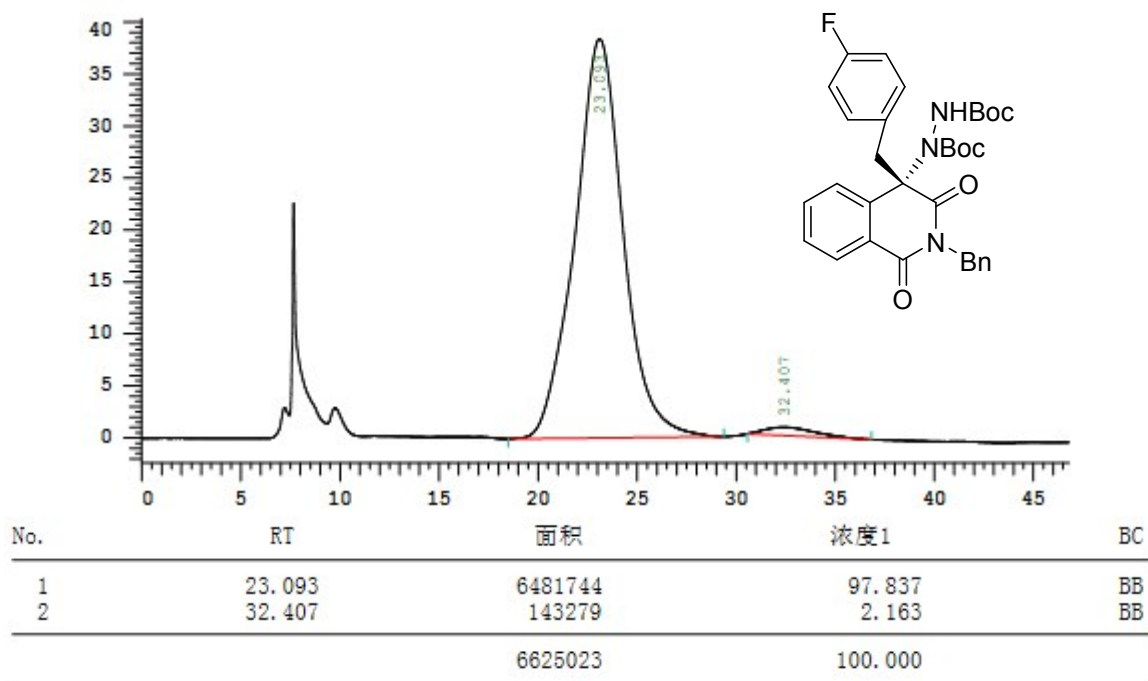

**di-tert-butyl(S)-1-(2-benzyl-4-(4-chlorobenzyl)-1,3-dioxo-1,2,3,4-tetrahydroisoquinolin-4-yl)hydrazine-1,2-dicarboxylate(6i):**

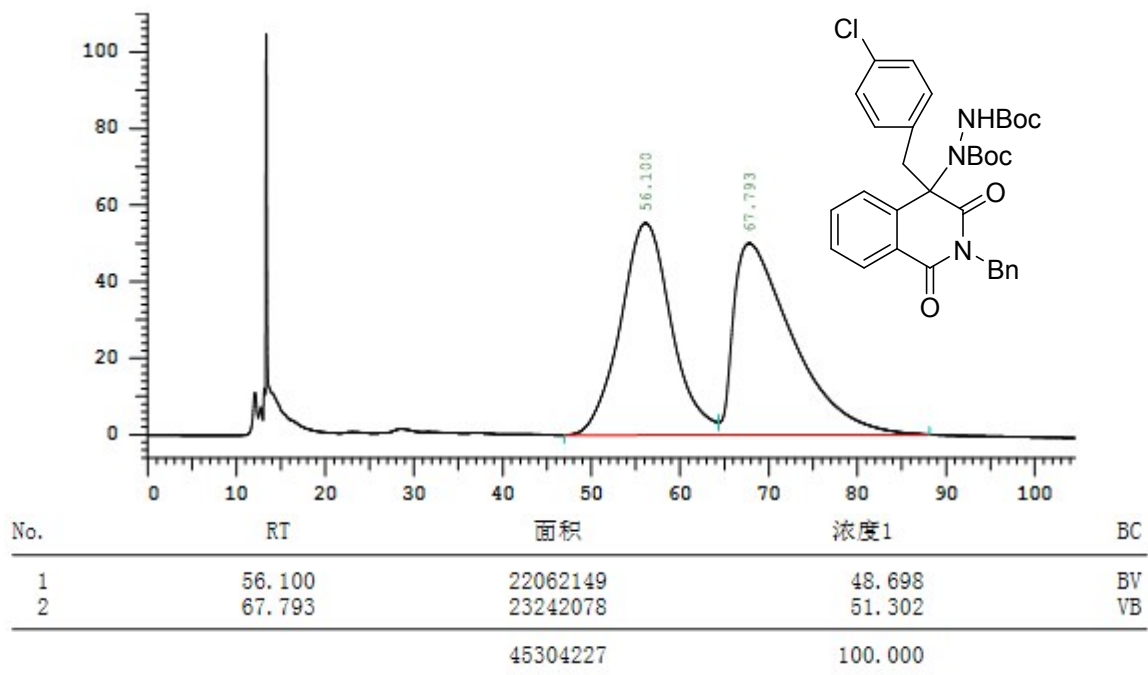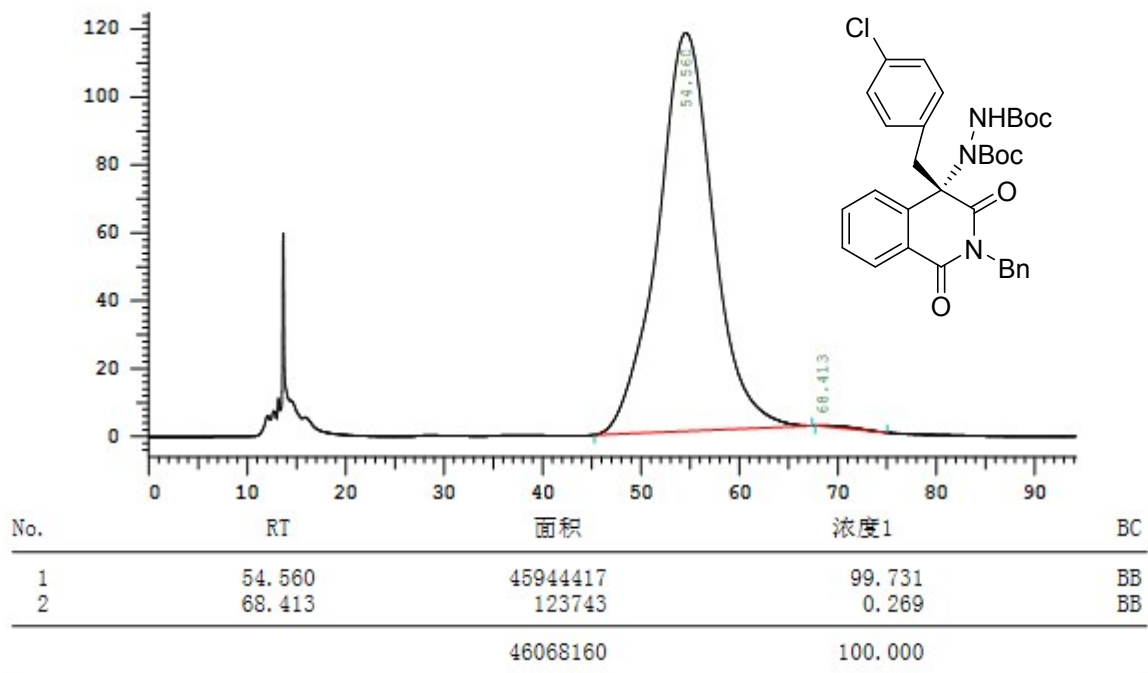

**di-tert-butyl(S)-1-(2-benzyl-4-(4-bromobenzyl)-1,3-dioxo-1,2,3,4-tetrahydroisoquinolin-4-yl)hydrazine-1,2-dicarboxylate (6j):**

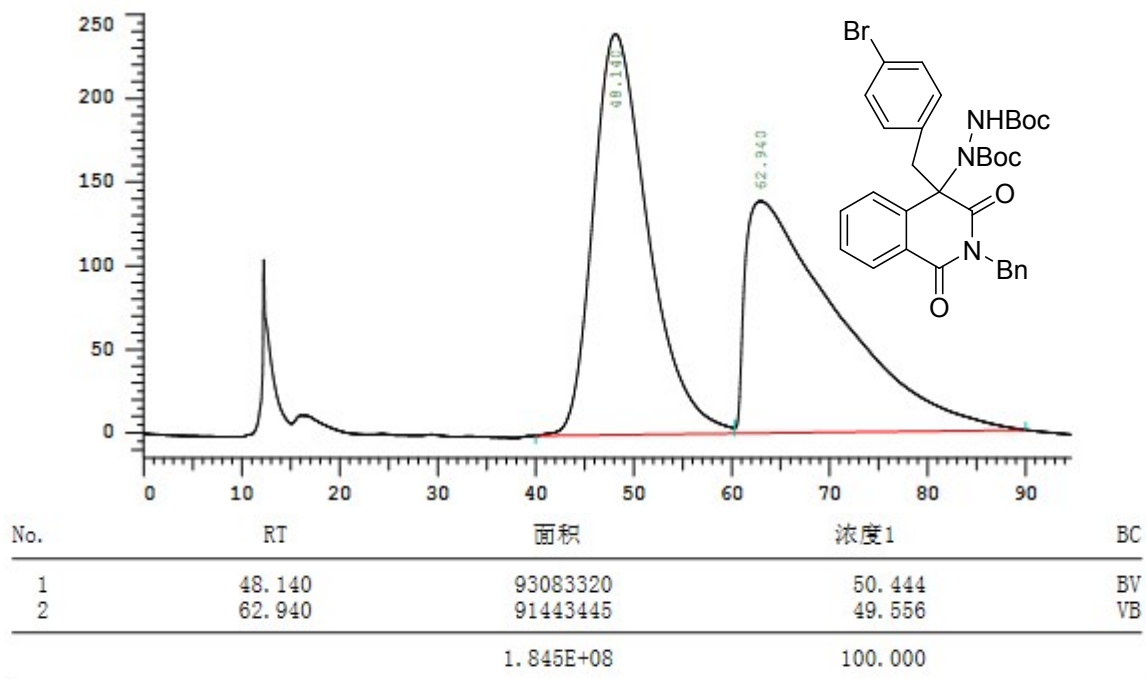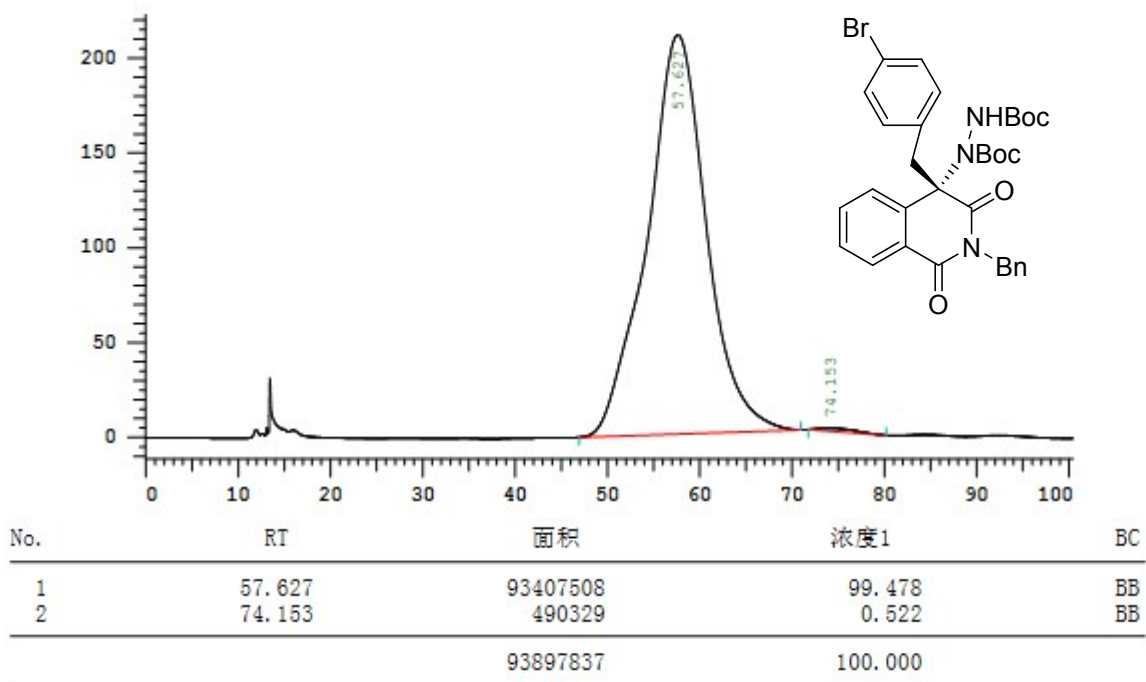

**di-tert-butyl(S)-1-(2-benzyl-4-(3-methylbenzyl)-1,3-dioxo-1,2,3,4-tetrahydroisoquinolin-4-yl)hydrazine-1,2-dicarboxylate (6k):**

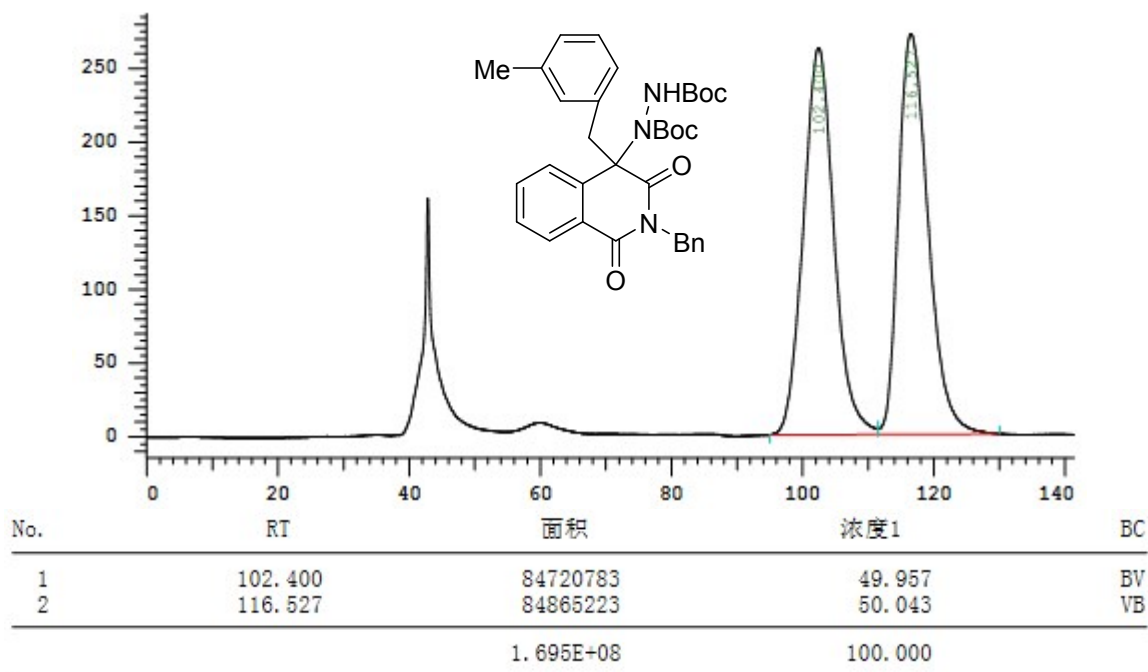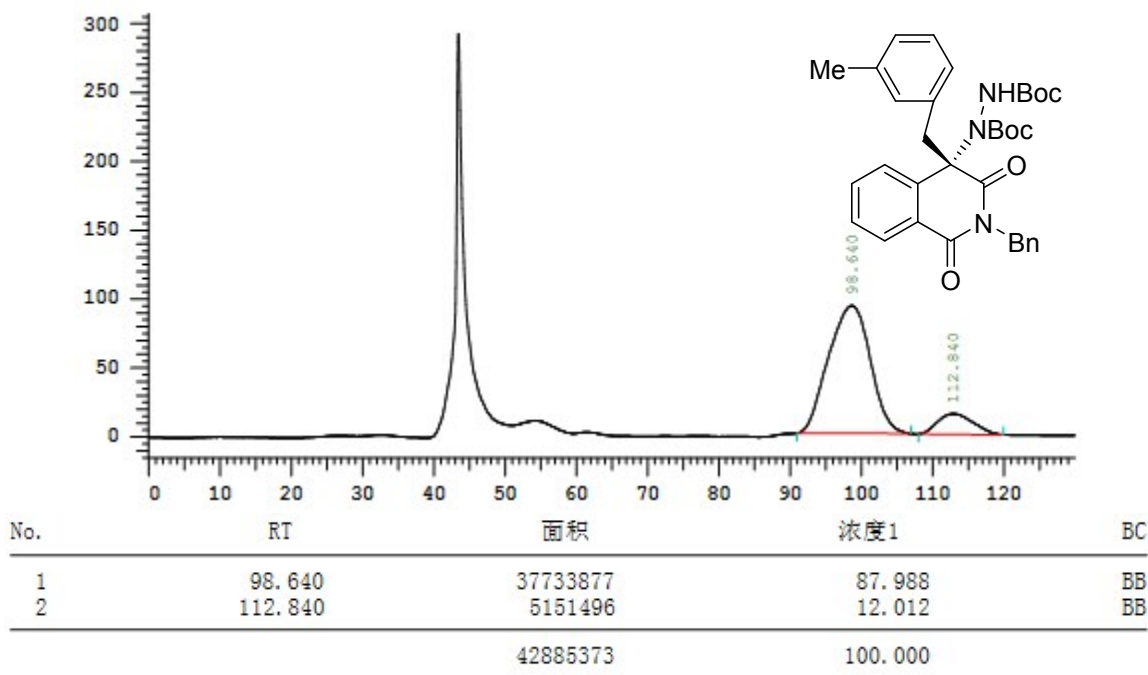

**di-tert-butyl(S)-1-(2-benzyl-4-(3-bromobenzyl)-1,3-dioxo-1,2,3,4-tetrahydroisoquinolin-4-yl)hydrazine-1,2-dicarboxylate (6l):**

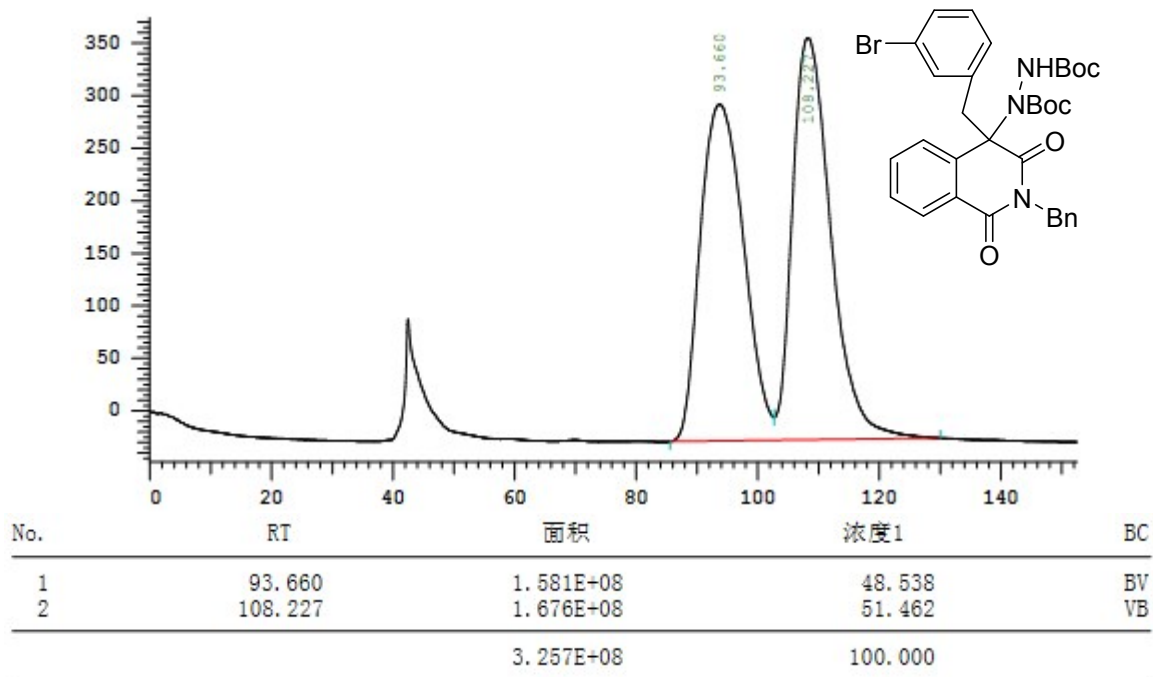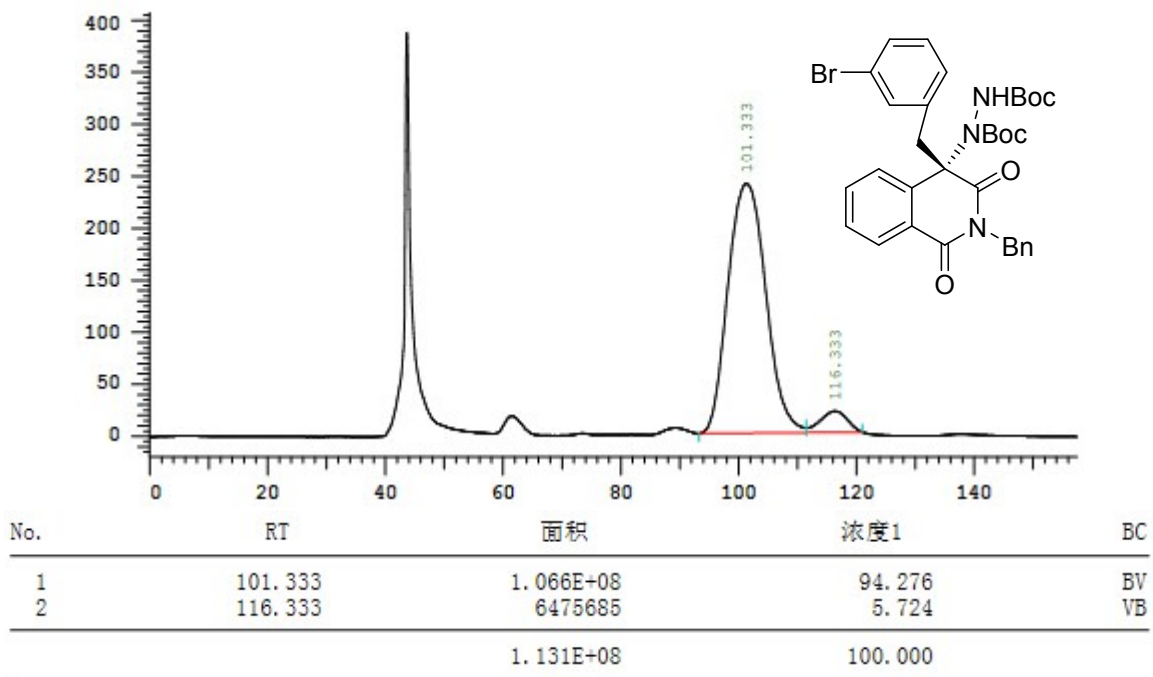

**di-tert-butyl(S)-1-(2-benzyl-4-(2-methoxybenzyl)-1,3-dioxo-1,2,3,4-tetrahydroisoquinolin-4-yl)hydrazine-1,2-dicarboxylate (6m):**

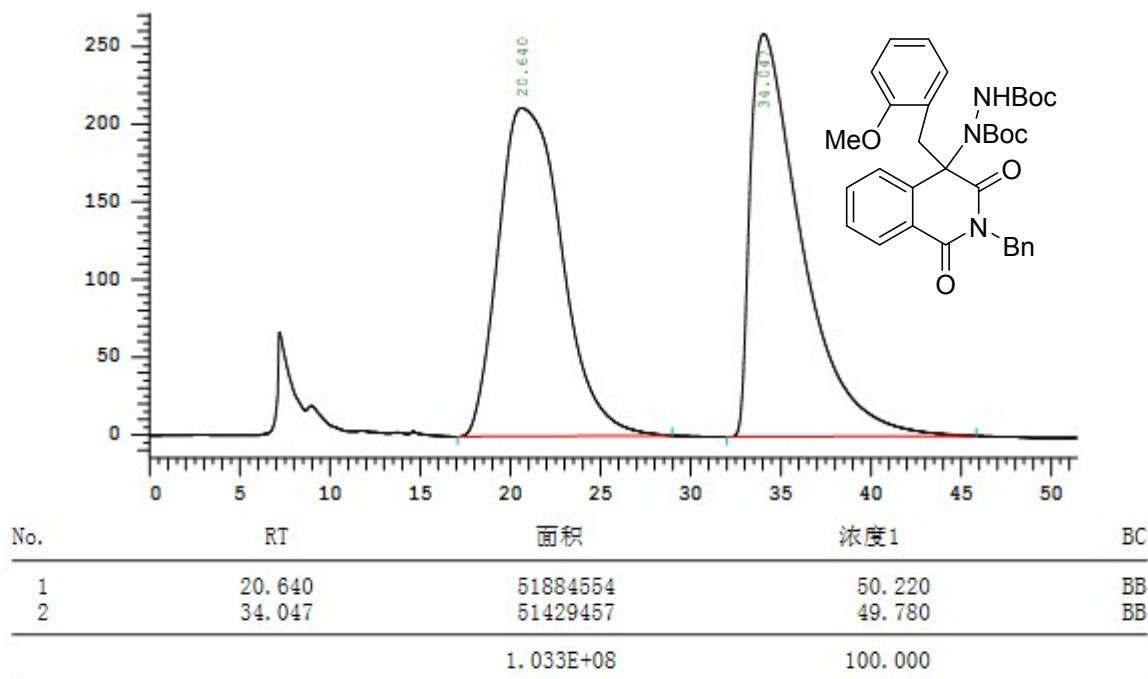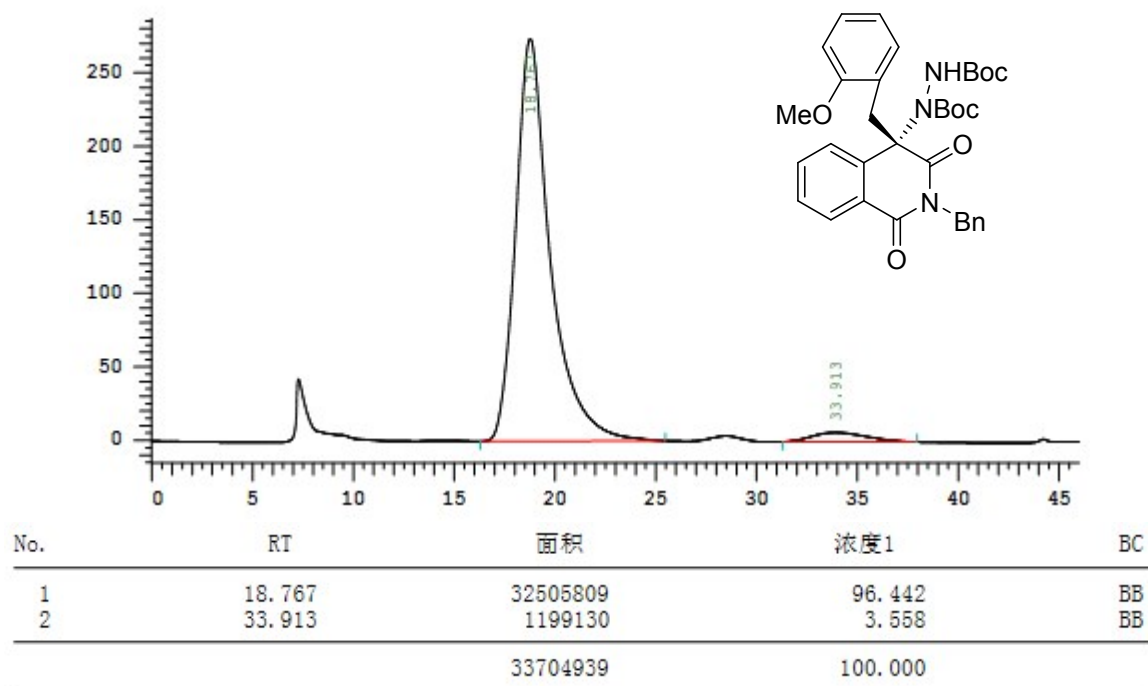



**di-tert-butyl(S)-1-(2-benzyl-4-(2-methylbenzyl)-1,3-dioxo-1,2,3,4-tetrahydroisoquinolin-4-yl)hydrazine-1,2-dicarboxylate (6n):**

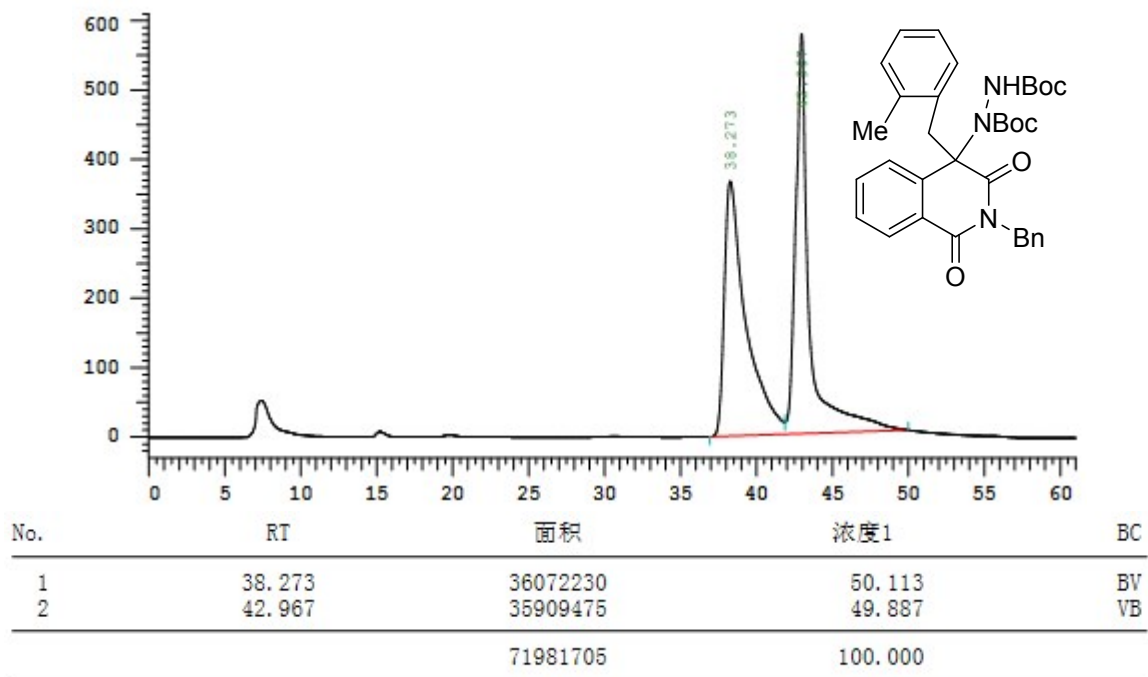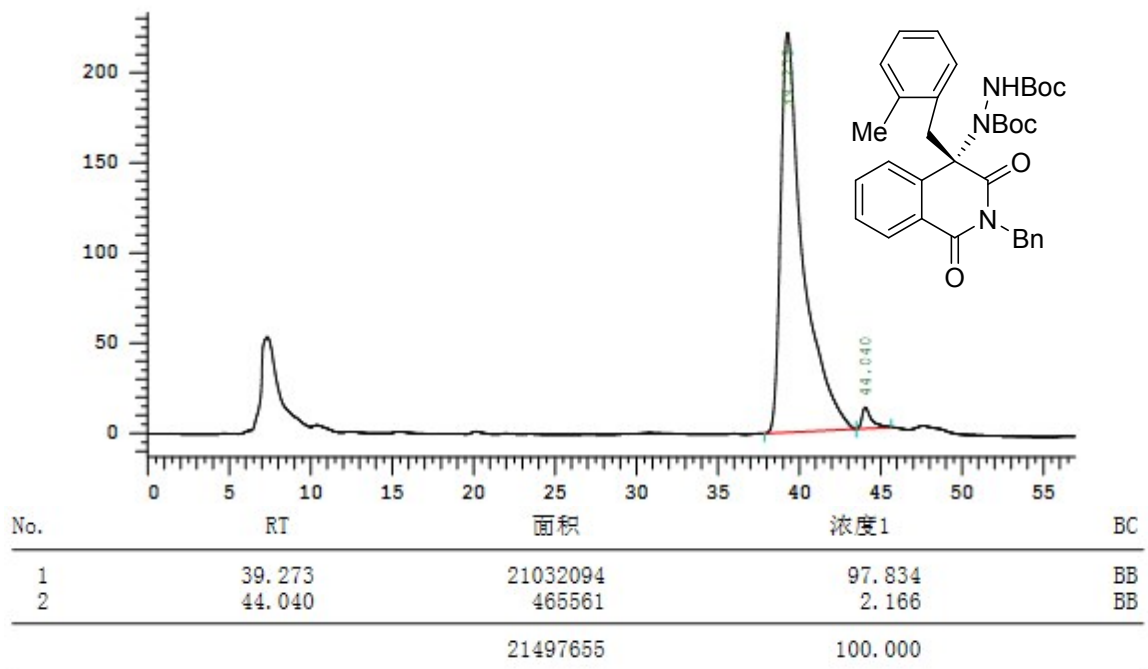

**di-tert-butyl(S)-1-(2-benzyl-4-(2-chlorobenzyl)-1,3-dioxo-1,2,3,4-tetrahydroisoquinolin-4-yl)hydrazine-1,2-dicarboxylate (6o):**

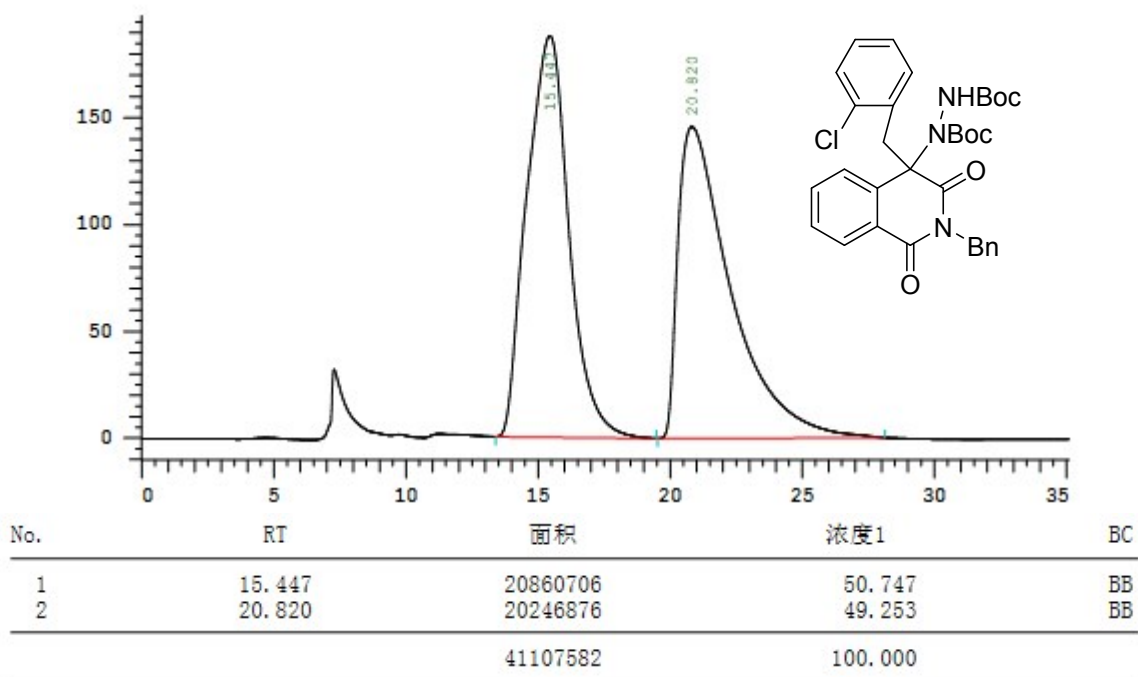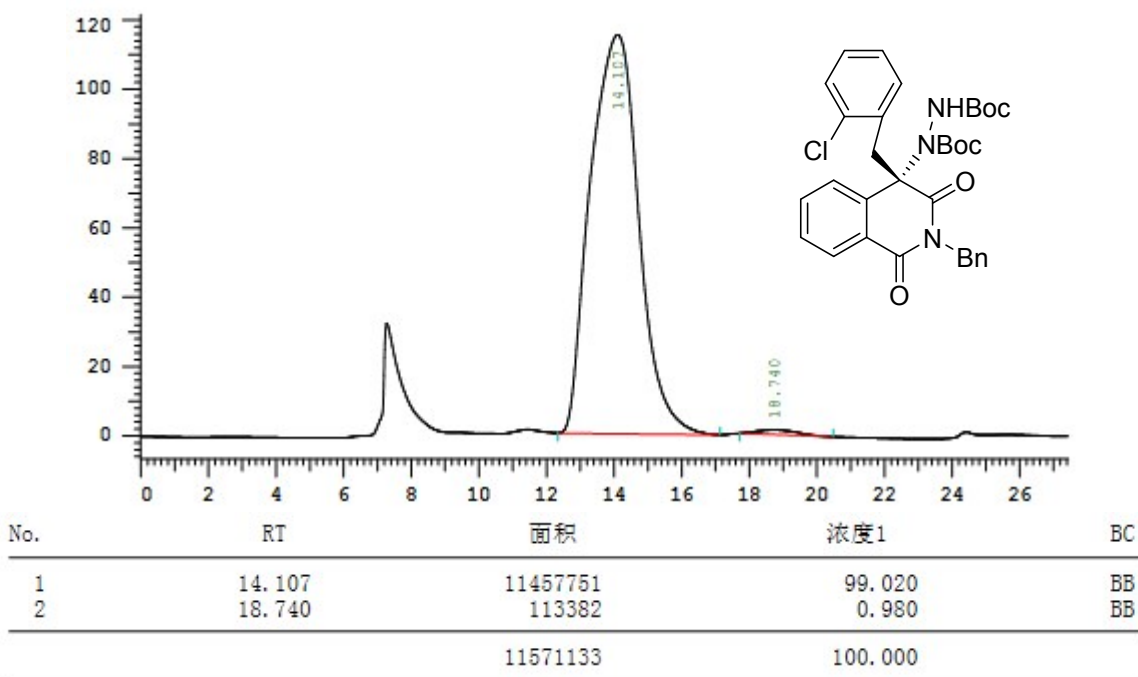

**di-tert-butyl(S)-1-(2-benzyl-1,3-dioxo-4-(3,4,5-trimethoxybenzyl)-1,2,3,4-tetrahydroisoquinolin-4-yl)hydrazine-1,2-dicarboxylate (6p):**

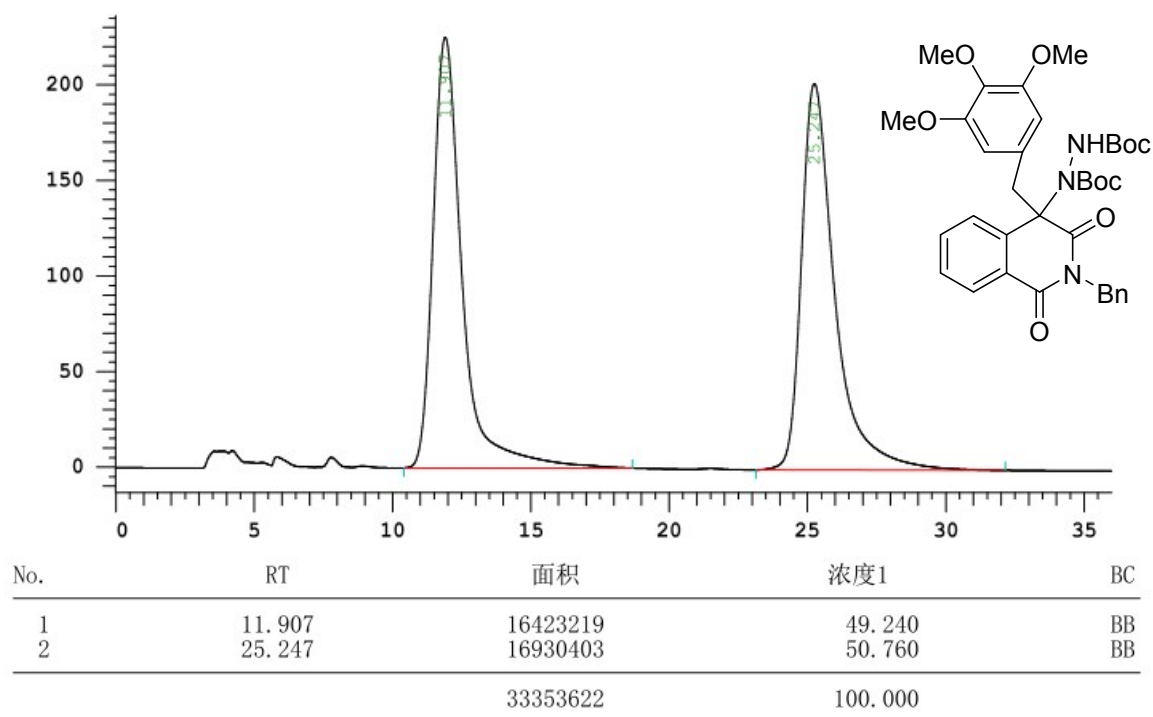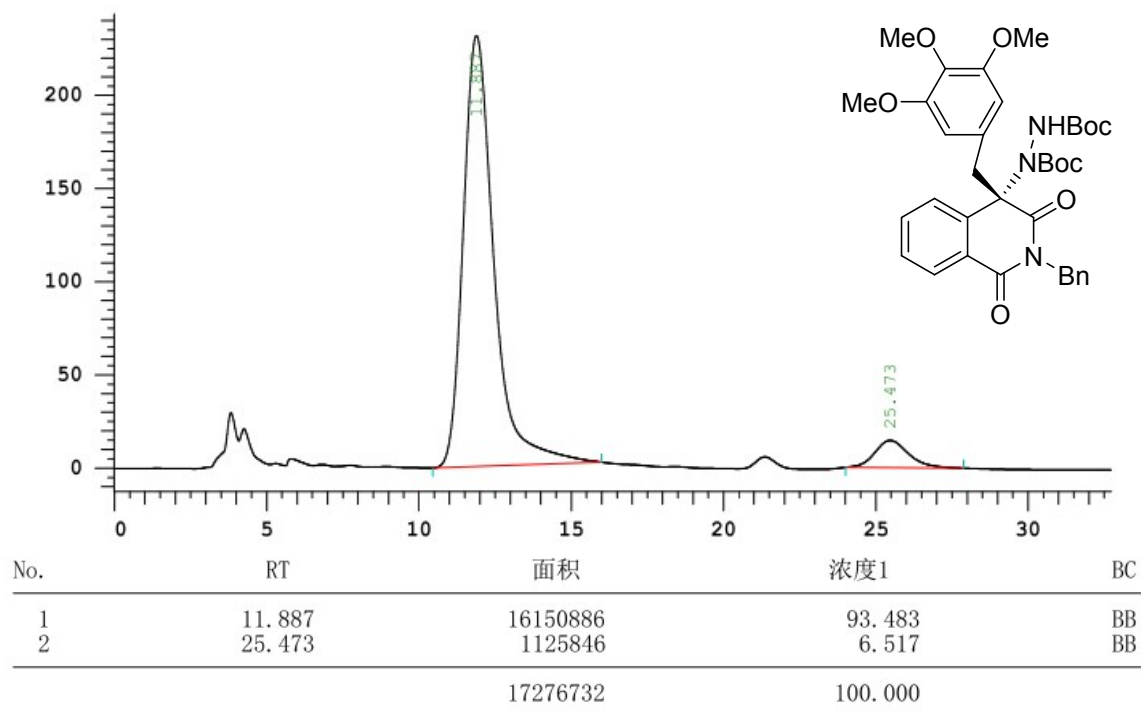

**di-tert-butyl(S)-1-(2-benzyl-4-(naphthalen-2-ylmethyl)-1,3-dioxo-1,2,3,4-tetrahydroisoquinolin-4-yl)hydrazine-1,2-dicarboxylate (6q):**

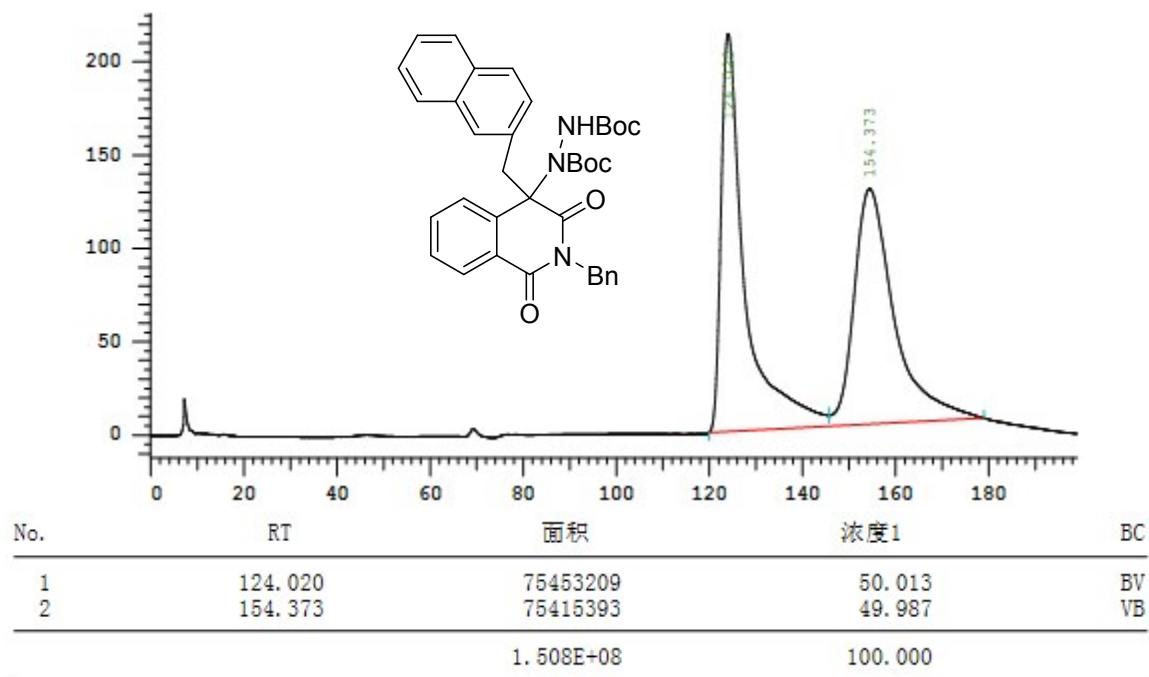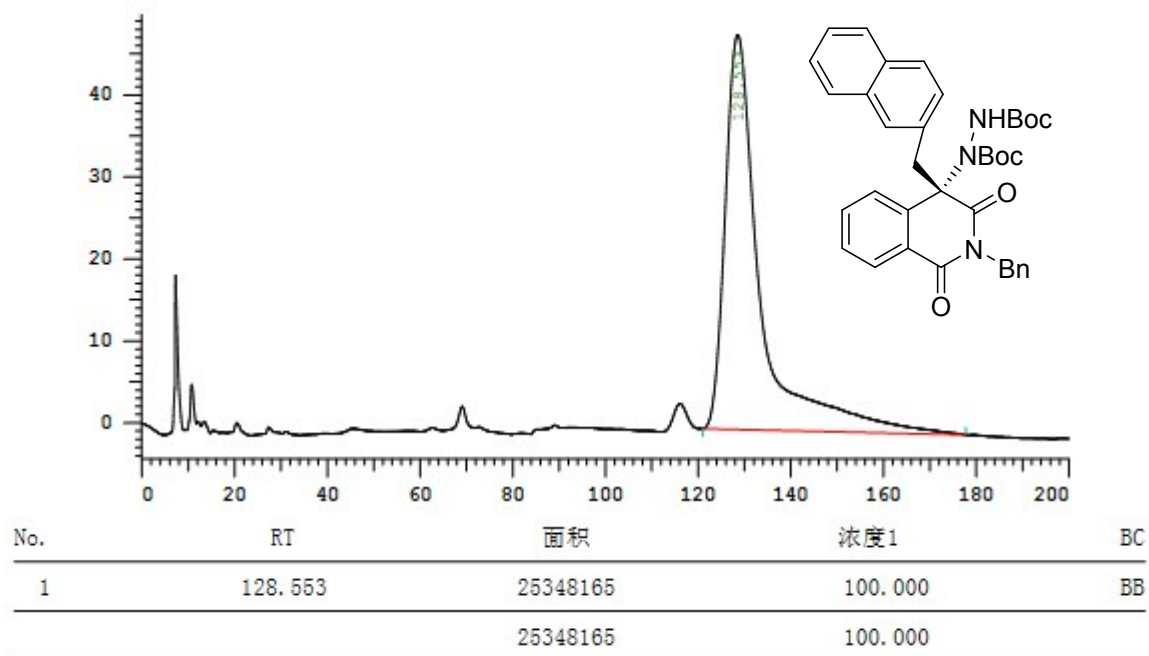

**di-tert-butyl(S)-1-(4-((1H-indol-2-yl)methyl)-2-benzyl-1,3-dioxo-1,2,3,4-tetrahydroisoquinolin-4-yl)hydrazine-1,2-dicarboxylate (6r):**

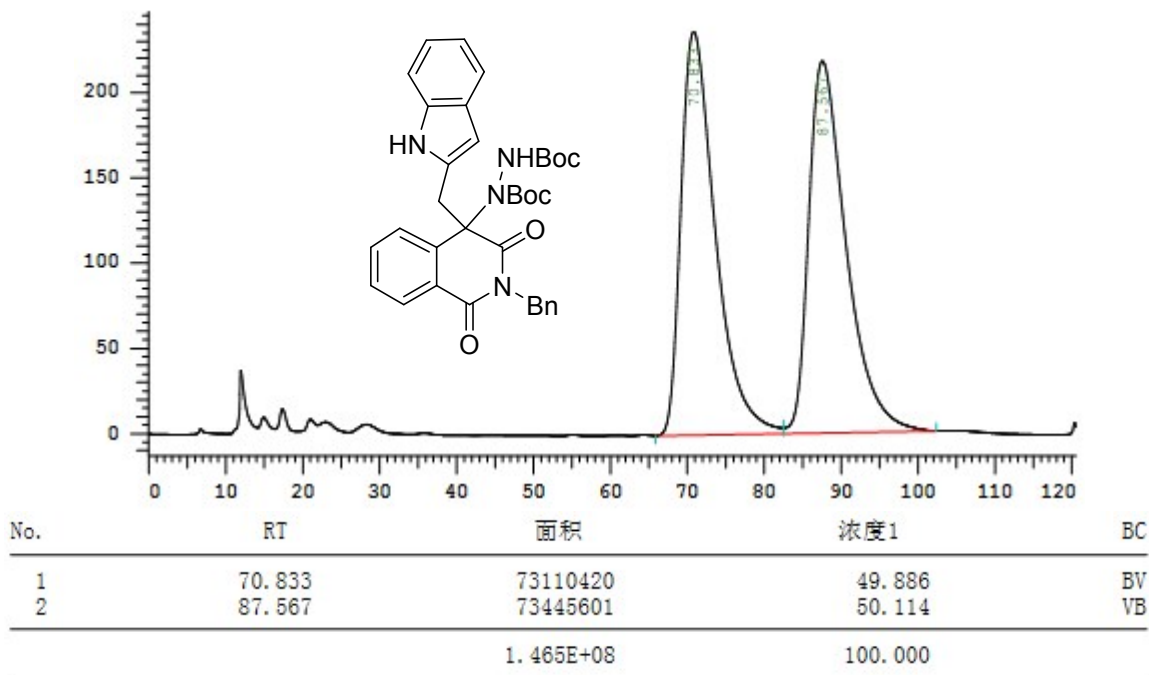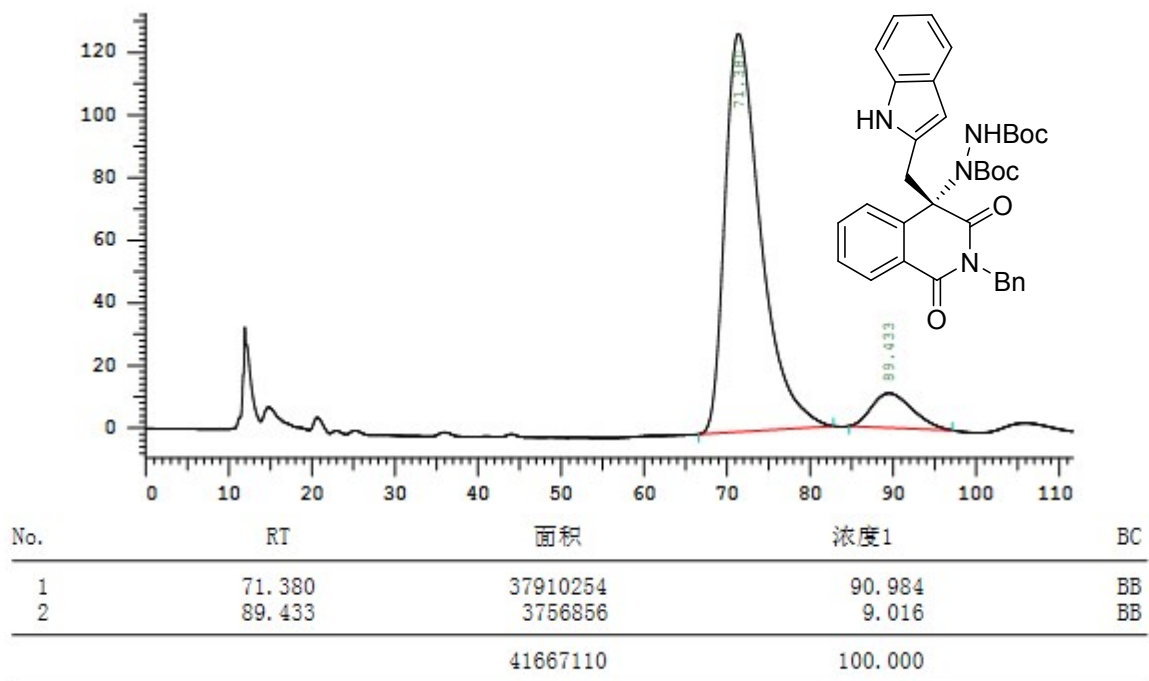

**di-tert-butyl(S)-1-(4-((1H-indol-3-yl)methyl)-2-benzyl-1,3-dioxo-1,2,3,4-tetrahydroisoquinolin-4-yl)hydrazine-1,2-dicarboxylate (6s):**

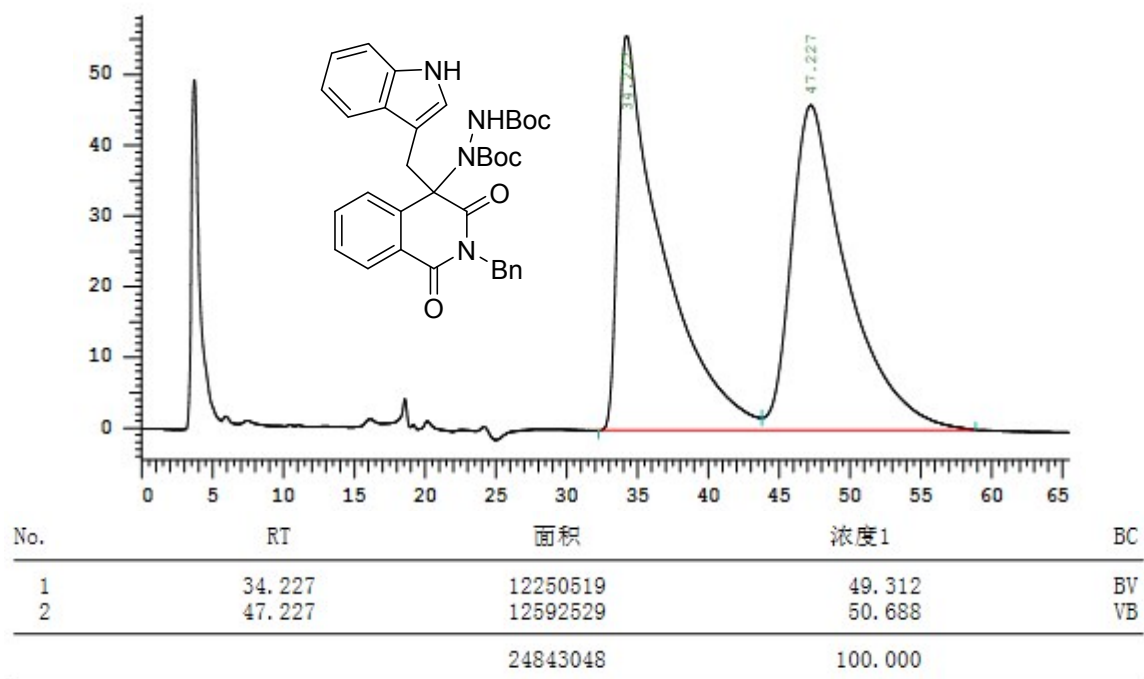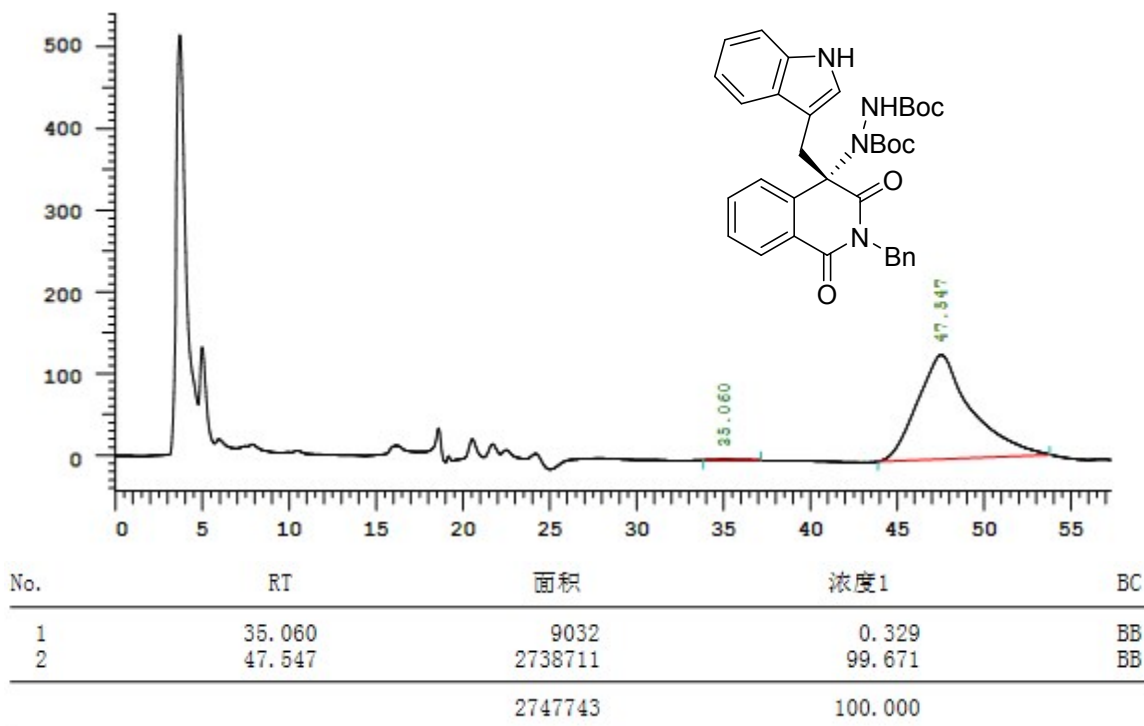

**di-tert-butyl(S)-1-(2-benzyl-4-((2-methyl-1H-indol-3-yl)methyl)-1,3-dioxo-1,2,3,4-tetrahydroisoquinolin-4-yl)hydrazine-1,2-dicarboxylate (6t):**

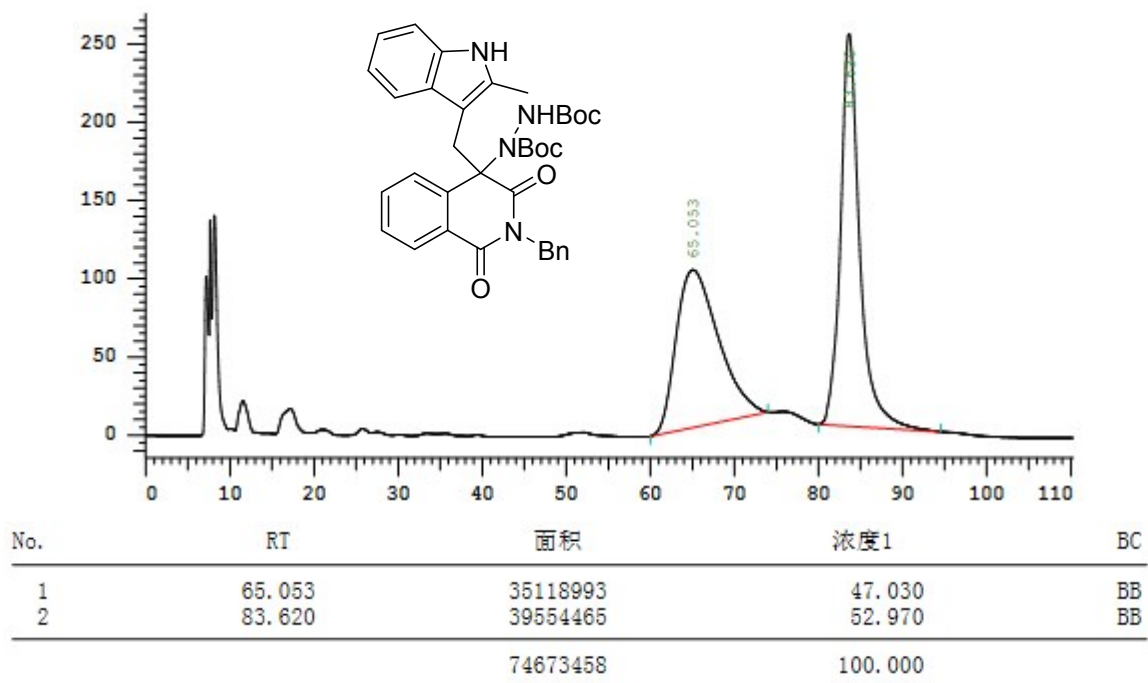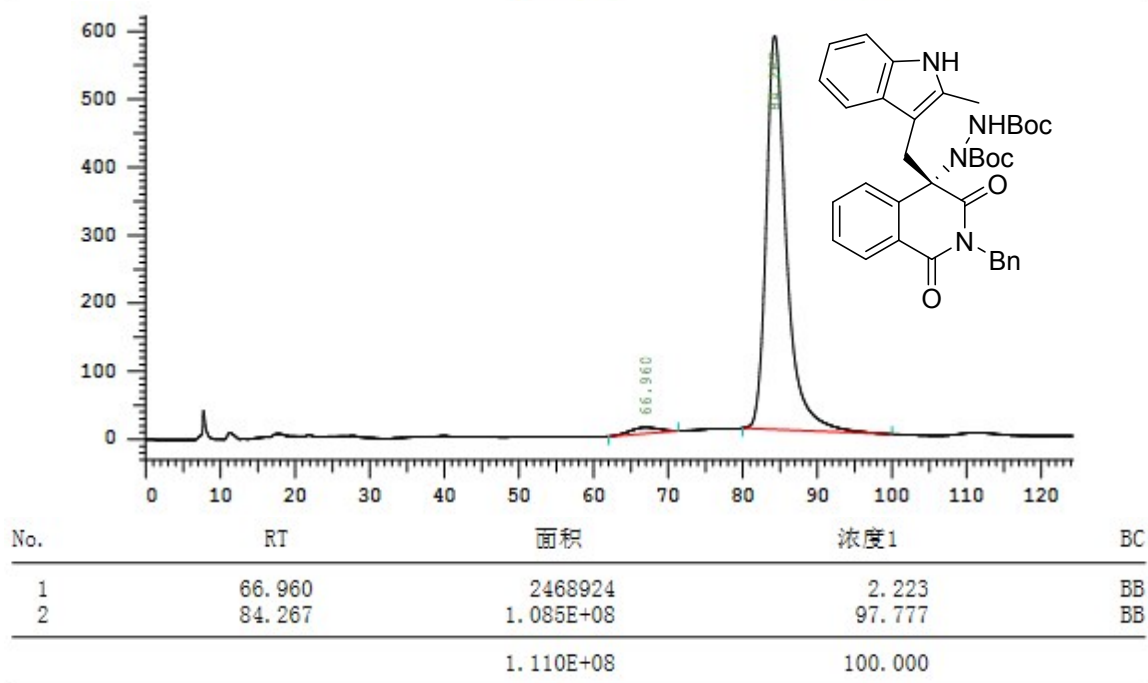

**di-tert-butyl(S)-1-(2-benzyl-4-(furan-2-ylmethyl)-1,3-dioxo-1,2,3,4-tetrahydroisoquinolin-4-yl)hydrazine-1,2-dicarboxylate (6u):**

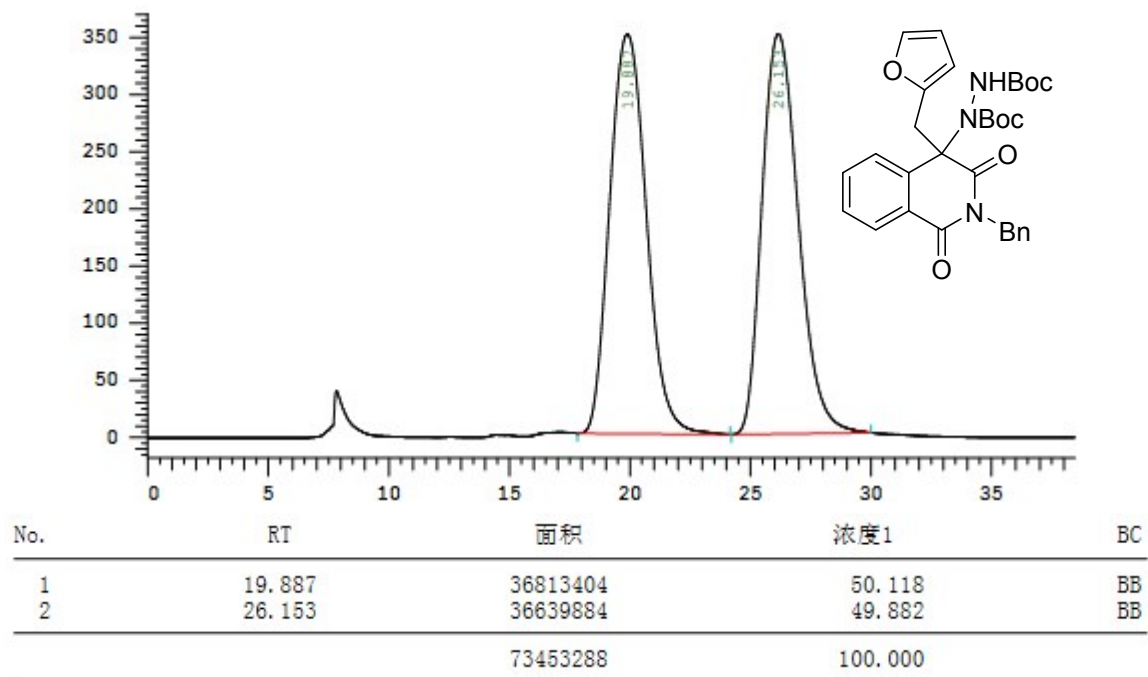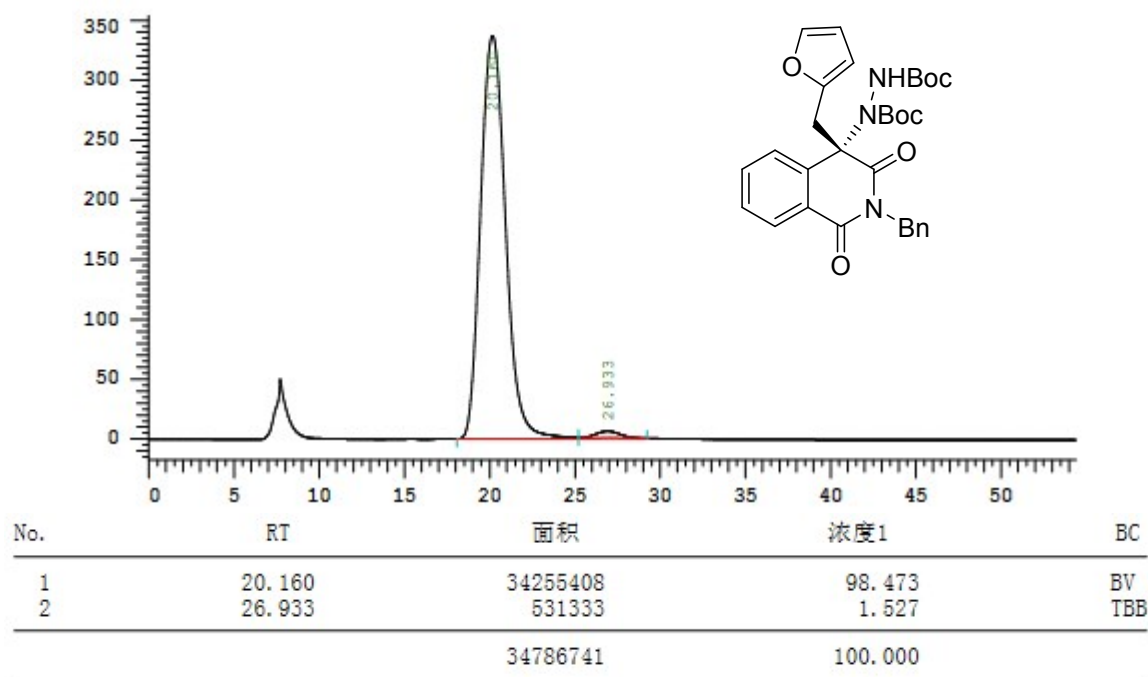



**diethyl (S)-1-(2-benzyl-4-butyl-1,3-dioxo-1,2,3,4-tetrahydroisoquinolin-4-yl)hydrazine-1,2-dicarboxylate(6v):**

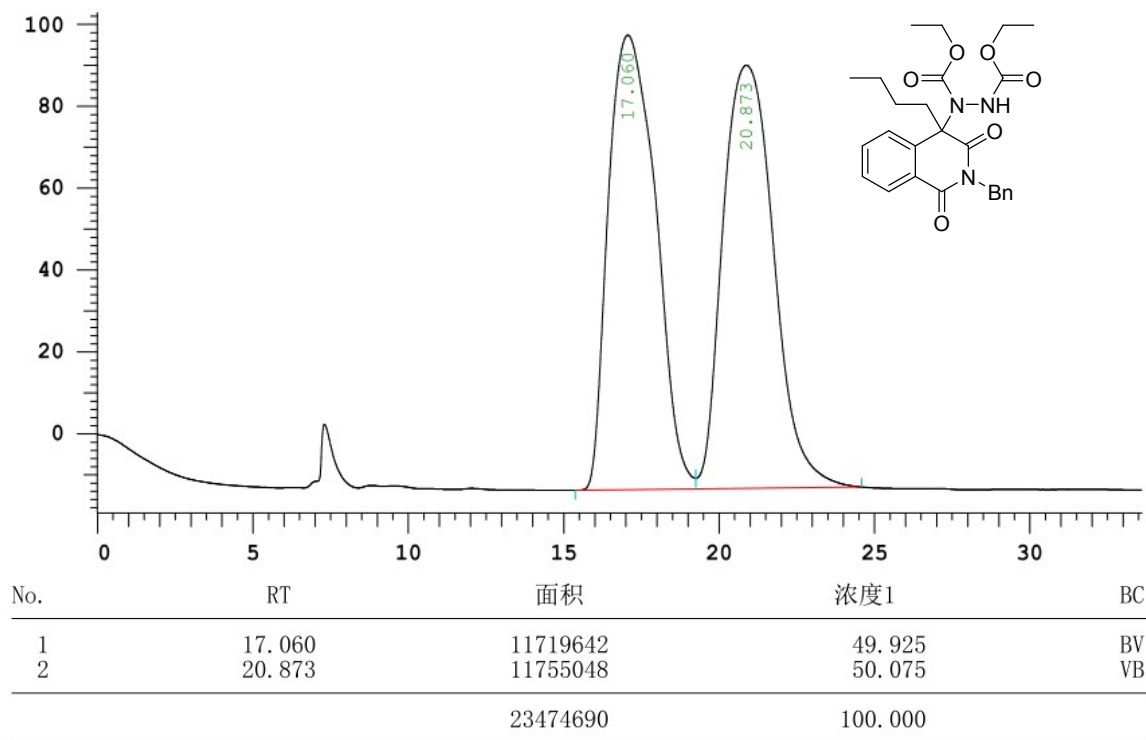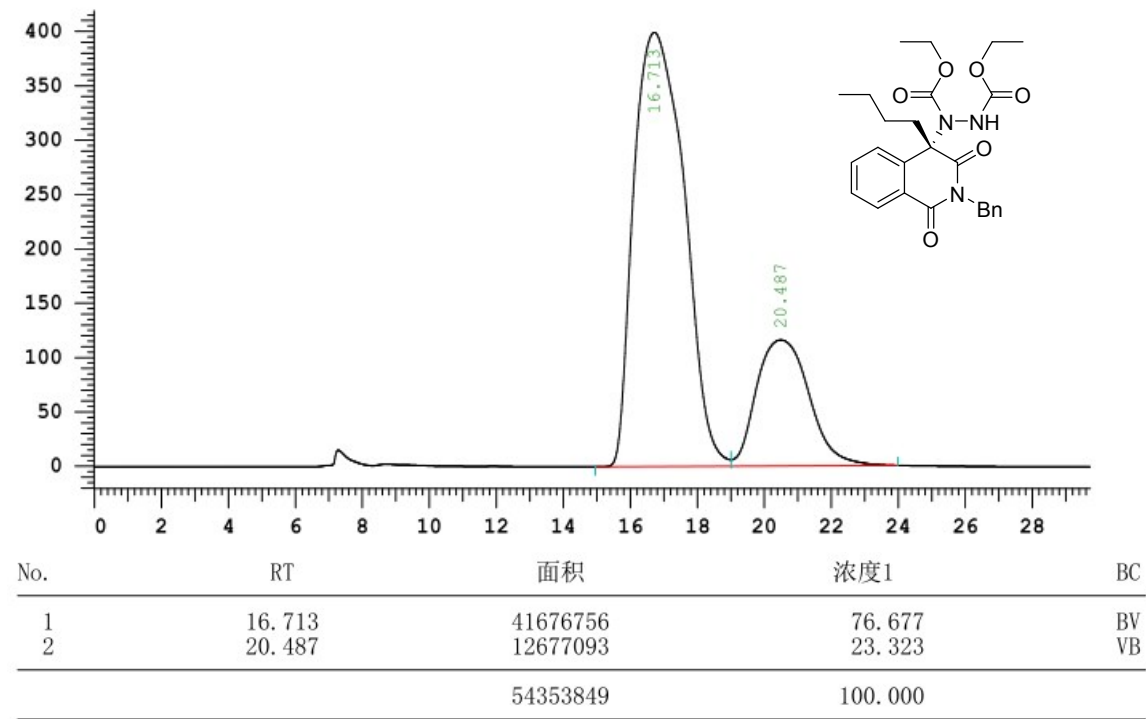

**diisopropyl (S)-1-(2-benzyl-4-butyl-1,3-dioxo-1,2,3,4-tetrahydroisoquinolin-4-yl)hydrazine-1,2-dicarboxylate(6w):**

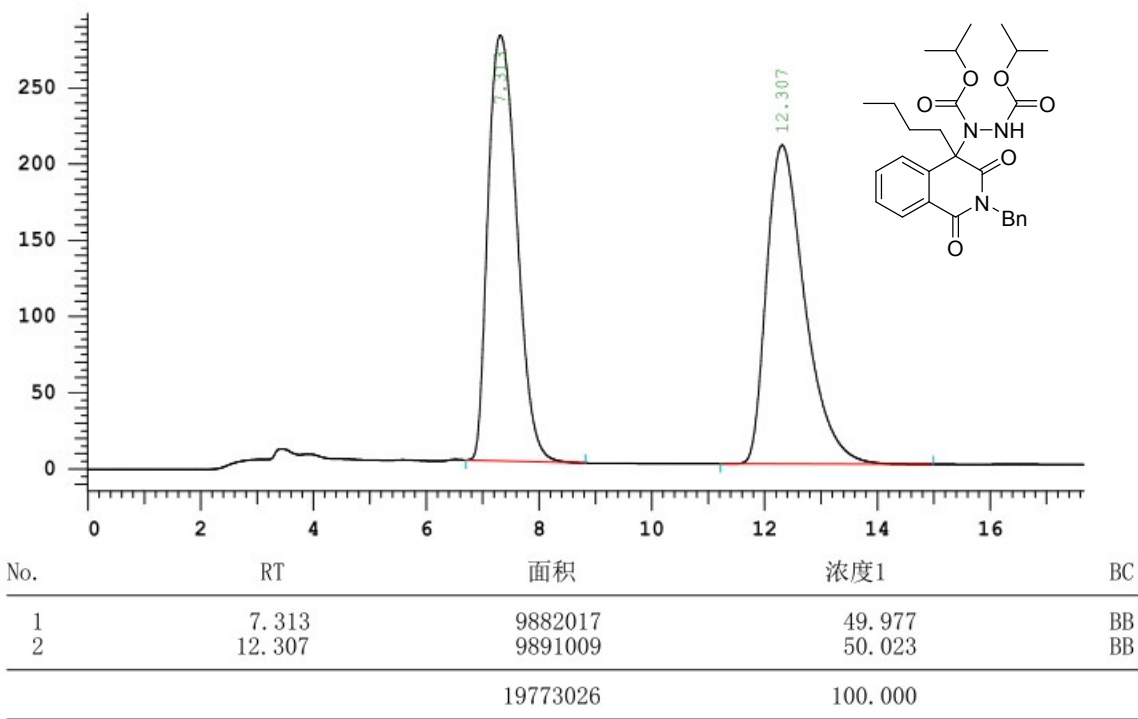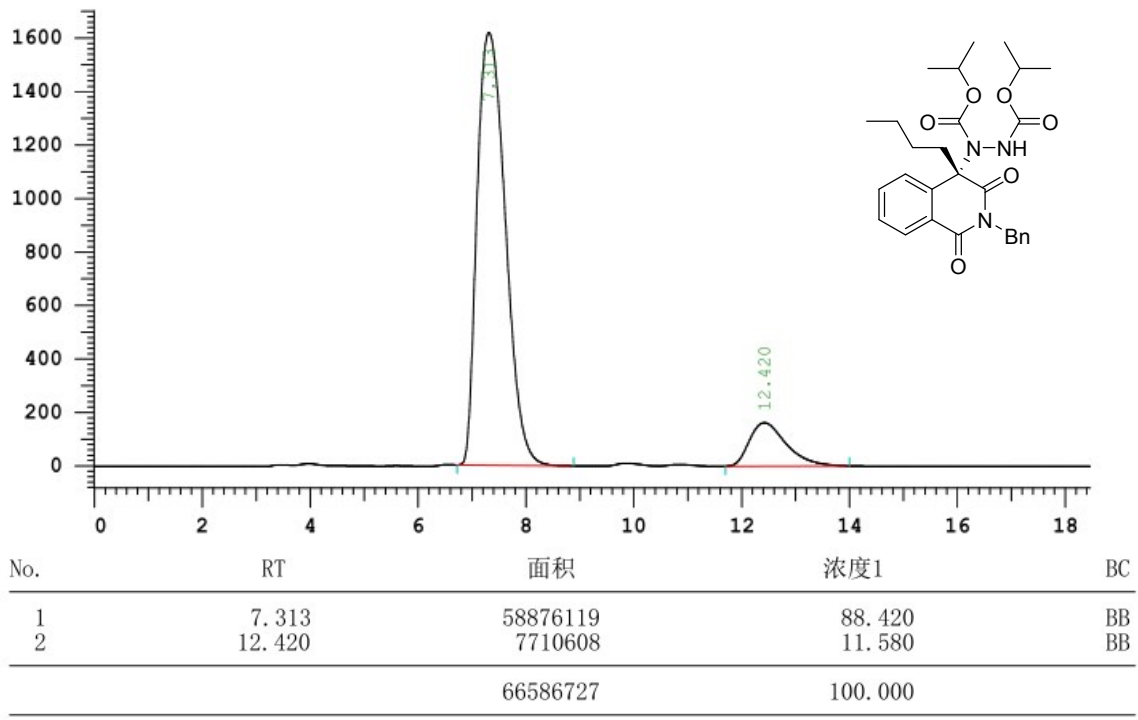

**(R)-N-benzyl-1-(4-chlorobenzyl)-3-oxoisindoline-1-carboxamide (7):**

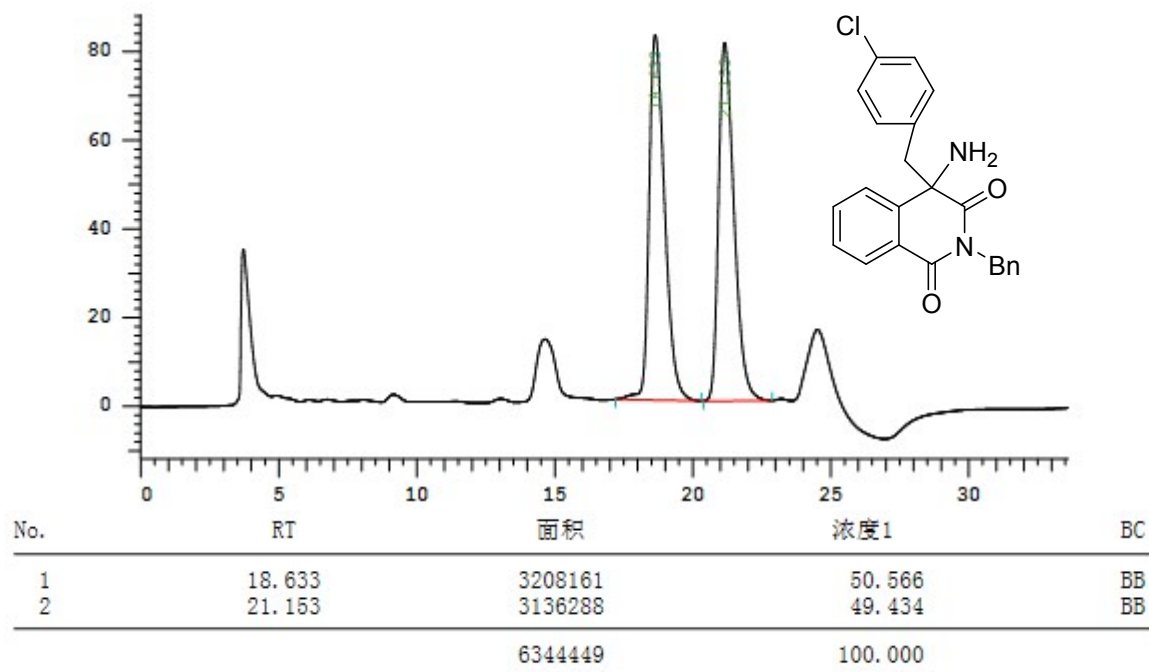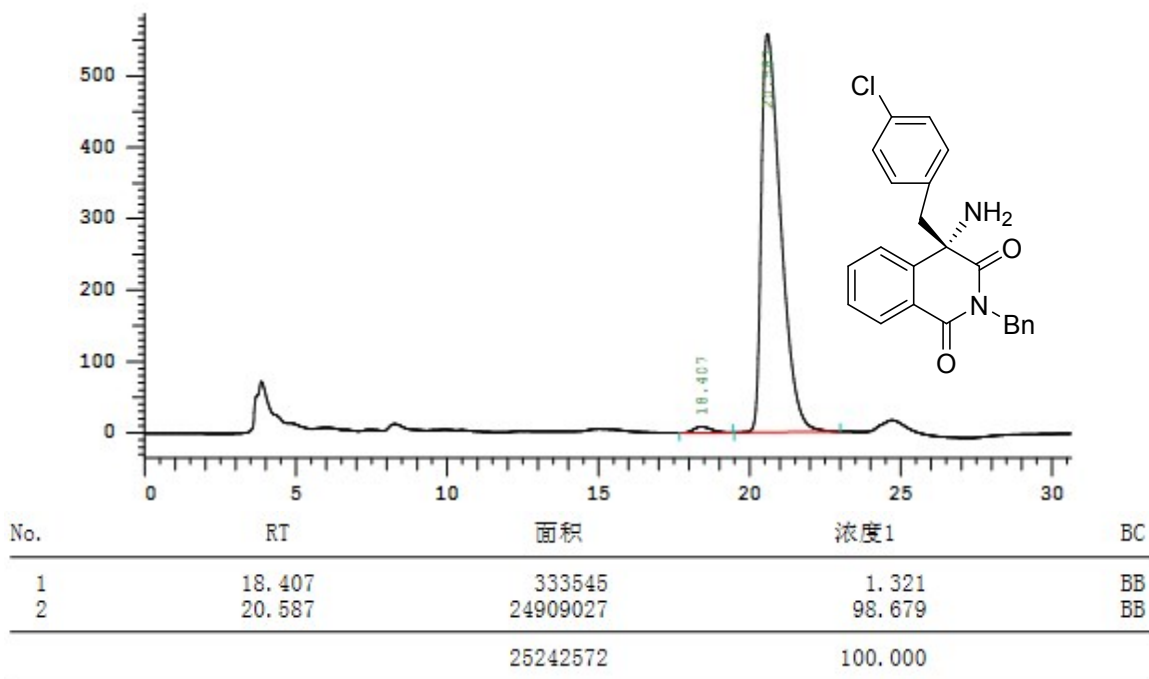

## 10. References:

1. Guo Yang, Yingxian Li, Cheng Cheng, Shun Zhou, Dandan Zheng, Yuanyong Yang, Lei Tang, Synthesis of monosubstituted Isoquinoline-1,3(2H,4H)-diones. *Science Technology and Engineering*, **2019**, 9, 10–14.
2. Weihong Liang, Wenhao Yin, Tingzhong Wang, Fayang G. Qiu, Junling Zhao. Organocatalytic Stereoselective Conjugate Addition of 3-Substituted Oxindoles with In Situ Generated ortho-Quinone Methides. *Tetrahedron Letters*, **2018**, 59, 1742-1747.
